# Supplementary material for: Development and Validation of a Targeted Next-Generation Sequencing Gene Panel for Children With Neuroinflammation
Source: PubMed Central journal article supplement (PMC6824223; doi:10.1001/jamanetworkopen.2019.14274), 2019-10-30
Supplement: jamanetwopen-2-e1914274-s001.pdf [file jamanetwopen-2-e1914274-s001.pdf]

## Supplementary Online Content

McCreary D, Omoyinmi E, Hong Y, et al. Development and validation of a targeted next-generation sequencing gene panel for children with neuroinflammation. *JAMA Netw Open*. 2019;2(10):e1914274. doi:10.1001/jamanetworkopen.2019.14274

### **eMethods.** Additional Information

**eTable 1.** List of Laboratory Investigations Organized in Context of Routine Clinical Care for Patients With Suspected Neuroinflammation

**eTable 2.** Detailed List of Genes Included in Neuroinflammation Panel (NIP)

**eTable 3.** SureDesign Description of Probes for NIP

**eTable 4.** Regions Below the Depth of Coverage Threshold of 30X

**eTable 5.** List of Regions With More Baits Added to Improve Coverage

**eTable 6.** Clinical Features and Class 4 and 5 Genetic Variants Identified on Neuroinflammation Gene Panel (NIP) in Patients With Suspected Genetic Neuroinflammatory Disorders and Unknown Molecular Diagnoses

**eTable 7.** Clinical Features and Class 3 Genetic Variants Identified on Neuroinflammation Gene Panel (NIP) in 34 Patients With Suspected Genetic Neuroinflammatory Disorders and Unknown Molecular Diagnoses

**eFigure.** Further Tests in Patients With Isolated Neuroinflammation

This supplementary material has been provided by the authors to give readers additional information about their work.

## **eMethods.** Additional Information

### *Granule release assay*

The granule release assay was performed according to Wheeler et al. (2010). Peripheral blood mononuclear cells (PBMC) were stimulated with IL-2 overnight, and then incubated with FITC-conjugated anti-CD107a antibody alone, or with anti-CD3 antibody or PHA, for 2 h. Samples were analyzed by flow cytometry and gating on lymphocytes by forward/side scatter. CD107a expression was analyzed on cytotoxic T cells (CD8+ and CD3+) and on NK cells (CD56+ and CD3-), and the increase in percentage of CD107a+ cells between unstimulated and stimulated samples was calculated.

### *XIAP and SAP Protein expression.*

Normal healthy control and whole blood was fixed and permeabilized using Intraprep/Intraperm (Beckman Coulter) according to manufacturer's protocol. An isotype IgG (BD Biosciences), anti-SAP (Abnova) or anti-XIAP (BD Biosciences) was added at to each tube, incubated 15 minutes room temperature, washed with PBS/0.1mM EDTA/1%BSA followed by staining with anti-CD3, anti-CD56 and anti-CD8 (BD Bioscience) for 10 minutes at room temperature. Samples were then washed, fixed (Cell Fix, BD Bioscience) and acquired on a FACsCalibur (BD Bioscience). Using Celle Quest software (BD Bioscience), sequential gating was used to identify the CD8 population and then histogram analyses with SAP and XIAP overlaying the isotype. Controls have >50% positivity for SAP and XIAP.

### *Bioinformatics parameters used for both SureCall and Genesis pipelines.*

Agilent SureCall (Version 4.0.1.46) analysis parameters:

SNPPET caller in SureCall was used to identify single nucleotide polymorphisms (SNPs), multiple nucleotide polymorphisms (MNP). The parameters that SureCall uses to identify SNPs, MNPs, and indels are:

- QC Metric applied: true
- Report Regions Having Read Depth Below: 20
- Enable Trimming: true
- Quality Threshold for Trimming: 5
- Minimum Read Length Fraction: 30
- Maximum Read Length Fraction: 100
- Aligner applied: true
- Illumina: BWA MEM
- Mismatch Penalty: 4.0
- Base Quality Encoding: Auto Detect
- Score Threshold for a Match: 1.0
- Maximum Number of Mismatches: 2
- Output Filter: Unique Best Hits
- Constraint for maximal gap length: 100
- Minimum matching seed length: 19
- Remove Duplicates: true
- Region Padding applied: true
- Region Padding: 100
- BAQ SNP Caller applied: false
- SNPPET SNP Caller applied: true
- Quality value threshold: 0.3
- Use base quality recalibration: false

- Minimum mapping quality for read: 30
  - Minimum quality for base: 30
  - Report multiple Alleles at a locus: false
  - Quality value threshold (low frequency): 100
  - Minimum Allele Frequency: 0.03
  - Minimum number of reads supporting variant allele: 10
- Parameters for SureCall data analysis for Copy Number Variation.*

- QC Metric applied: true
- Report Regions Having Read Depth Below: 20
- Enable Trimming: true
- Quality Threshold for Trimming: 5
- Minimum Read Length Fraction: 30
- Maximum Read Length Fraction: 100
- Aligner applied: true
- Illumina: BWA MEM
- Mismatch Penalty: 4.0
- Base Quality Encoding: Auto Detect
- Score Threshold for a Match: 1.0
- Maximum Number of Mismatches: 2
- Output Filter: Unique Best Hits
- Constraint for maximal gap length: 100
- Minimum matching seed length: 19
- Remove Duplicates: true
- Region Padding applied: true
- Region Padding: 100
- BAQ SNP Caller applied: false
- SNPPEP SNP Caller applied: true
- Quality value threshold: 0.3
- Use base quality recalibration: false
- Minimum mapping quality for read: 30
- Minimum quality for base: 30
- Report multiple Alleles at a locus: false
- Quality value threshold (low frequency): 100
- Minimum Allele Frequency: 0.01
- Minimum number of reads supporting variant allele: 10
- Minimum number of read pairs per barcode: 2
- Minimum number of reads supporting Denovo variant: 10
- Denovo variant quality: 0
- Denovo variant genotype quality: 10
- SNP Filter: true
- Absolute difference in max base quality observed for variant and wild type reads: 20:20:20
- Mutation Impact: Default
- Version of Annotation: V3

*Parameters for Genesis data analysis*

Genesis is an in-house pipeline, developed at NE Thames Regional Genetics laboratory. In short, paired end reads were aligned to the human genome (GRCh37) using Burrows-Wheeler Aligner (BWA)-MEM version 0.7.15<sup>47</sup> and the variant calling was performed using Freebayes (sensitive settings; version 1.1.0; <https://github.com/ekg/freebayes>) using region of interest of the targeted genes. VEP87 and Gemini v0.20 were used for variant annotation and filtering. Variants were further annotated using Alamut-batch (version 1.9; <http://www.interactive-biosoftware.com/alamut-batch/>) and variants with ExAC frequency > 2% were filtered out. CNVs were called using a bioconductor package ExomeDepth (version 1.0.7; <sup>48</sup>) excluding sex chromosomes. Coverage depth was calculated using chanjo (version 2.3.2; <https://github.com/robinandeer/chanjo>).

**eTable 1.** List of laboratory investigations organized in context of routine clinical care for patients with suspected neuroinflammation. CSF=cerebrospinal fluid. ANA=antinuclear antibodies. ENA=extranuclear antibodies. ANCA=antineutrophil cytoplasmic antibodies. MOG=myelin oligodendrocyte antibodies.

|                                                                                             |
|---------------------------------------------------------------------------------------------|
| Full blood count and blood film                                                             |
| Erythrocyte sedimentation rate                                                              |
| C-reactive protein                                                                          |
| Urea creatinine and electrolytes                                                            |
| Liver function tests                                                                        |
| CSF glucose and protein, microscopy and culture.                                            |
| CSF/serum oligoclonal bands                                                                 |
| CSF neopterin                                                                               |
| Clotting screen                                                                             |
| C3 and C4 levels, complement function                                                       |
| IgG/IgM/IgG                                                                                 |
| ANA/dsDNA/ENA                                                                               |
| ANCA                                                                                        |
| MOG antibodies                                                                              |
| Anti-aquaporin4 antibodies                                                                  |
| Urine for albumin: creatinine ratio.                                                        |
| Thyroid function and thyroid antibodies                                                     |
| Plasma amino acids, lactate, ammonia                                                        |
| For patients with suspected vasculopathy plasma homocysteine and alpha galactosidase levels |
| Muscle biopsy for respiratory chain enzymes in case of suspected mitochondrial disease      |

**eTable 2.** Detailed list of genes included in Neuroinflammation panel (NIP).

| <i>Gene</i>    | <i>HGNC Symbol</i> | <b>Gene Name</b>                                           | <b>Disease Group</b> | <b>Chr</b> | <b>Transcript reference from HGNC</b> |
|----------------|--------------------|------------------------------------------------------------|----------------------|------------|---------------------------------------|
| <i>ACTA2</i>   | <i>ACTA2</i>       | Actin alpha 2                                              | Arteriopathies       | 10         | NM_001613                             |
| <i>BMP2</i>    | <i>BMP2</i>        | Bone morphogenetic protein receptor type 2                 | Arteriopathies       | 2          | NM_001204                             |
| <i>CBL</i>     | <i>CBL</i>         | Cbl proto-oncogene                                         | Arteriopathies       | 11         | NM_005188                             |
| <i>CBS</i>     | <i>CBS</i>         | Cystathionine-beta-synthase                                | Arteriopathies       | 21         | NM_000071                             |
| <i>CECR1</i>   | <i>CECR1</i>       | Cat eye syndrome chromosome region 1/Adenosine deaminase 2 | Arteriopathies       | 22         | NM_001282225                          |
| <i>COL3A1</i>  | <i>COL3A1</i>      | Collagen type III alpha 1 chain                            | Arteriopathies       | 2          | NM_000090                             |
| <i>COL4A1</i>  | <i>COL4A1</i>      | Collagen type IV alpha 1 chain                             | Arteriopathies       | 13         | NM_001303110                          |
| <i>ELN</i>     | <i>ELN</i>         | Elastin                                                    | Arteriopathies       | 7          | NM_000501                             |
| <i>FBN1</i>    | <i>FBN1</i>        | Fibrillin1                                                 | Arteriopathies       | 15         | NM_000138                             |
| <i>FBN2</i>    | <i>FBN2</i>        | Fibrillin 2                                                | Arteriopathies       | 5          | NM_001999                             |
| <i>FOXE3</i>   | <i>FOXE3</i>       | Forkhead box E3                                            | Arteriopathies       | 1          | NM_012186                             |
| <i>FOXP3</i>   | <i>FOXP3</i>       | Forkhead box P3                                            | Arteriopathies       | X          | NM_014009                             |
| <i>GUCY1A3</i> | <i>GUCY1A3</i>     | Guanylate cyclase 1 soluble subunit alpha 1                | Arteriopathies       | 4          | NM_000856                             |
| <i>HTRA1</i>   | <i>HTRA1</i>       | HtrA serine peptidase-1 gene                               | Arteriopathies       | 10         | NM_002775                             |
| <i>LOX</i>     | <i>LOX</i>         | Lysyl oxidase                                              | Arteriopathies       | 5          | NM_001178102                          |
| <i>MAT2A</i>   | <i>MAT2A</i>       | Methionine adenosyltransferase 2A                          | Arteriopathies       | 2          | NM_005911                             |
| <i>MFAP5</i>   | <i>MFAP5</i>       | Microfibril associated protein 5                           | Arteriopathies       | 12         | NM_003480                             |
| <i>MYH11</i>   | <i>MYH11</i>       | Myosin heavy chain 11                                      | Arteriopathies       | 16         | NM_001040113                          |
| <i>MYLK</i>    | <i>MYLK</i>        | Myosin light chain kinase                                  | Arteriopathies       | 3          | NM_053025                             |
| <i>NOTCH1</i>  | <i>NOTCH1</i>      | Notch 1                                                    | Arteriopathies       | 9          | NM_017617                             |
| <i>NOTCH3</i>  | <i>NOTCH3</i>      | Notch 3                                                    | Arteriopathies       | 19         | NM_000435                             |
| <i>PRKG1</i>   | <i>PRKG1</i>       | Protein kinase cGMP-dependent 1                            | Arteriopathies       | 10         | NM_001098512                          |
| <i>RNF213</i>  | <i>RNF213</i>      | Ring finger protein 213                                    | Arteriopathies       | 17         | NM_020914                             |
| <i>SAMD3</i>   | <i>SAMD3</i>       | Sterile alpha motif domain containing 3                    | Arteriopathies       | 6          | NM_152552                             |
| <i>SKI</i>     | <i>SKI</i>         | SKI proto-oncogene                                         | Arteriopathies       | 1          | NM_003036                             |

|                |                |                                                        |                  |    |              |
|----------------|----------------|--------------------------------------------------------|------------------|----|--------------|
| <i>SLC2A10</i> | <i>SLC2A10</i> | Solute carrier family 2 member 10                      | Arteriopathies   | 20 | NM_030777    |
| <i>SMAD2</i>   | <i>SMAD2</i>   | SMAD family member 2                                   | Arteriopathies   | 18 | NM_005901    |
| <i>SMAD3</i>   | <i>SMAD3</i>   | SMAD family member 3                                   | Arteriopathies   | 15 | NM_005902    |
| <i>SMAD4</i>   | <i>SMAD4</i>   | SMAD family member 4                                   | Arteriopathies   | 18 | NM_005359    |
| <i>TGFB2</i>   | <i>TGFB2</i>   | Transforming growth factor beta 2                      | Arteriopathies   | 1  | NM_003238    |
| <i>TGFB3</i>   | <i>TGFB3</i>   | Transforming growth factor beta 3                      | Arteriopathies   | 14 | NM_003239    |
| <i>TGFBI</i>   | <i>TGFBI</i>   | Transforming growth factor beta induced                | Arteriopathies   | 5  | NM_000358    |
| <i>TGFBR1</i>  | <i>TGFBR1</i>  | Transforming growth factor beta receptor 1             | Arteriopathies   | 5  | NM_000358    |
| <i>TGFBR2</i>  | <i>TGFBR2</i>  | transforming growth factor beta receptor 2             | Arteriopathies   | 3  | NM_001024847 |
| <i>USB1</i>    | <i>USB1</i>    | U6 snRNA biogenesis phosphodiesterase 1                | Arteriopathies   | 16 | NM_024598    |
| <i>YYIAP1</i>  | -              | YY1 associated protein 1                               | Arteriopathies   | 1  | NM_139118    |
| <i>COPA</i>    | <i>COPA</i>    | Coatomer protein complex subunit alpha                 | Autoinflammatory | 1  | NM_004371    |
| <i>CTLA4</i>   | <i>CTLA4</i>   | Cytotoxic T-lymphocyte associated protein 4            | Autoinflammatory | 2  | NM_005214    |
| <i>IL1RN</i>   | <i>IL1RN</i>   | Interleukin 1 receptor antagonist                      | Autoinflammatory | 2  | NM_173841    |
| <i>LPIN2</i>   | <i>LPIN2</i>   | LPIN2                                                  | Autoinflammatory | 18 | NM_014646    |
| <i>MEFV</i>    | <i>MEFV</i>    | Mediterranean Fever                                    | Autoinflammatory | 16 | NM_000243    |
| <i>MVK</i>     | <i>MVK</i>     | Mevalonate Kinase                                      | Autoinflammatory | 16 | NM_000243    |
| <i>NLRP12</i>  | <i>NLRP12</i>  | NLR family pyrin domain containing 12                  | Autoinflammatory | 19 | NM_144687    |
| <i>NLRP3</i>   | <i>NLRP3</i>   | NLR family pyrin domain containing 3                   | Autoinflammatory | 1  | NM_004895    |
| <i>NOD2</i>    | <i>NOD2</i>    | Nucleotide binding oligomerization domain containing 2 | Autoinflammatory | 16 | NM_022162    |
| <i>OTULIN</i>  | <i>OTULIN</i>  | OTU deubiquitinase with linear linkage specificity     | Autoinflammatory | 5  | NM_138348    |
| <i>PLCG2</i>   | <i>PLCG2</i>   | Phospholipase C gamma 2                                | Autoinflammatory | 16 | NM_002661    |
| <i>PLOD1</i>   | <i>PLOD1</i>   | Procollagen-lysine,2-oxoglutarate 5-dioxygenase 1      | Autoinflammatory | 1  | NM_000302    |

|                 |                 |                                                            |                      |    |              |
|-----------------|-----------------|------------------------------------------------------------|----------------------|----|--------------|
| <i>PSMA3</i>    | <i>PSMA3</i>    | Proteasome subunit alpha 3                                 | Autoinflammatory     | 14 | NM_002788    |
| <i>PSTPIP1</i>  | <i>PSTPIP1</i>  | Proline-serine-threonine phosphatase interacting protein 1 | Autoinflammatory     | 15 | NM_003978    |
| <i>PYCARD</i>   | <i>PYCARD</i>   | PYD and CARD domain containing                             | Autoinflammatory     | 16 | NM_013258    |
| <i>RBCK1</i>    | <i>RBCK1</i>    | RANBP2-type and C3HC4-type zinc finger containing 1        | Autoinflammatory     | 20 | NM_031229    |
| <i>TNFAIP3</i>  | <i>TNFAIP3</i>  | TNF alpha induced protein 3                                | Autoinflammatory     | 6  | NM_001270507 |
| <i>TNFRSF1A</i> | <i>TNFRSF1A</i> | TNF receptor superfamily member 1A                         | Autoinflammatory     | 12 | NM_001065    |
| <i>TRAP1</i>    | <i>TRAP2</i>    | TNF receptor associated protein 1                          | Autoinflammatory     | 16 | NM_016292    |
| <i>TRIM28</i>   | <i>TRIM28</i>   | tripartite motif containing 28                             | Autoinflammatory     | 19 | NM_005762    |
| <i>TRNT1</i>    | <i>TRNT1</i>    | tRNA nucleotidyl transferase 1                             | Autoinflammatory     | 3  | NM_001302946 |
| <i>WDR1</i>     | <i>WDR1</i>     | WD repeat domain 1                                         | Autoinflammatory     | 4  | NM_005112    |
| <i>CIQA</i>     | <i>CIQA</i>     | Complement component 1, q subcomponent, A chain            | Complement disorders | 1  | NM_015991    |
| <i>CIQB</i>     | <i>CIQB</i>     | Complement component 1, q subcomponent, B chain            | Complement disorders | 1  | NM_000491    |
| <i>CIQC</i>     | <i>CIQC</i>     | Complement component 1, q subcomponent, C chain            | Complement disorders | 1  | NM_172369    |
| <i>C1R</i>      | <i>C1R</i>      | Complement component 1r                                    | Complement disorders | 12 | NM_001733    |
| <i>C2</i>       | <i>C2</i>       | Complement component 2                                     | Complement disorders | 6  | NM_000063    |
| <i>C3</i>       | <i>C3</i>       | Complement component 3                                     | Complement disorders | 19 | NM_000064    |
| <i>C5</i>       | <i>C5</i>       | Complement component 5                                     | Complement disorders | 9  | NM_001735    |
| <i>C6</i>       | <i>C6</i>       | Complement component 6                                     | Complement disorders | 5  | NM_000065    |
| <i>C7</i>       | <i>C7</i>       | Complement component 7                                     | Complement disorders | 5  | NM_000587    |
| <i>C8A</i>      | <i>C8A</i>      | Complement component 8 alpha                               | Complement disorders | 1  | NM_000562    |
| <i>C8B</i>      | <i>C8B</i>      | Complement component 8 beta                                | Complement disorders | 1  | NM_000066    |
| <i>CFH</i>      | <i>CFH</i>      | Complement factor H                                        | Complement disorders | 1  | NM_000186    |

|                |                |                                                    |                                  |    |              |
|----------------|----------------|----------------------------------------------------|----------------------------------|----|--------------|
| <i>CFHR5</i>   | <i>CFHR5</i>   | Complement factor H-related protein 5              | Complement disorders             | 1  | NM_030787    |
| <i>CFI</i>     | <i>CFI</i>     | Complement factor 1                                | Complement disorders             | 4  | NM_000204    |
| <i>CTPS1</i>   | <i>CTPS1</i>   | CTP synthase 1                                     | Complement disorders             | 1  | NM_001905    |
| <i>MASP2</i>   | <i>MASP2</i>   | Mannan binding lectin serine peptidase 2           | Complement disorders             | 1  | NM_006610    |
| <i>RANBP2</i>  | <i>RANBP2</i>  | RAN binding protein 2                              | Encephalomyelitis                | 2  | NM_006267    |
| <i>NLRC4</i>   | <i>NLRC4</i>   | NLR family CARD domain containing 4                | Haemophagocytic lymphosticytosis | 2  | NM_021209    |
| <i>PRF1</i>    | <i>PRF1</i>    | Perforin 1                                         | Haemophagocytic lymphosticytosis | 10 | NM_005041    |
| <i>SH2D1A</i>  | <i>SH2D1A</i>  | SH2 domain containing 1A                           | Haemophagocytic lymphosticytosis | X  | NM_002351    |
| <i>SLC29A3</i> | <i>SLC29A3</i> | Solute carrier family 29 member 3                  | Haemophagocytic lymphosticytosis | 10 | NM_018344    |
| <i>STX11</i>   | <i>STX11</i>   | Syntaxin 11                                        | Haemophagocytic lymphosticytosis | 6  | NM_003764    |
| <i>STXBP2</i>  | <i>STXBP2</i>  | Syntaxin binding protein 2                         | Haemophagocytic lymphosticytosis | 19 | NM_006949    |
| <i>UNC13D</i>  | <i>UNC13D</i>  | Unc-13 homolog D                                   | Haemophagocytic lymphosticytosis | 17 | NM_199242    |
| <i>XIAP</i>    | <i>XIAP</i>    | X-linked inhibitor of apoptosis                    | Haemophagocytic lymphosticytosis | x  | NM_001167    |
| <i>CLEC16A</i> | <i>CLEC16A</i> | C-type lectin domain containing 16A                | Immunodeficiency                 | 16 | NM_015226    |
| <i>FAS</i>     | <i>FAS</i>     | Fas cell surface death receptor                    | Immunodeficiency                 | 10 | NM_000043    |
| <i>GATA2</i>   | <i>GATA2</i>   | GATA binding protein 2                             | Immunodeficiency                 | 3  | NM_032638    |
| <i>IRF5</i>    | <i>IRF5</i>    | Interferon regulatory factor 5                     | Immunodeficiency                 | 7  | NM_001098627 |
| <i>IRF8</i>    | <i>IRF8</i>    | Interferon regulatory factor 8                     | Immunodeficiency                 | 16 | NM_002163    |
| <i>ITPR3</i>   | <i>ITPR3</i>   | Inositol 1,4,5-trisphosphate receptor type 3       | Immunodeficiency                 | 6  | NM_002224    |
| <i>MYO5A</i>   | <i>MYO5A</i>   | Myosin VA                                          | Immunodeficiency                 | 15 | NM_000259    |
| <i>PTPN22</i>  | <i>PTPN22</i>  | Protein tyrosine phosphatase, non-receptor type 22 | Immunodeficiency                 | 1  | NM_015967    |
| <i>RHOD</i>    | <i>RHOD</i>    | Ras homolog family member D                        | Immunodeficiency                 | 11 | NM_014578    |
| <i>STAT3</i>   | <i>STAT3</i>   | Signal transducer and activator of transcription 3 | Immunodeficiency                 | 17 | NM_139276    |
| <i>STAT4</i>   | <i>STAT4</i>   | Signal transducer and activator of transcription 4 | Immunodeficiency                 | 2  | NM_003151    |



|                 |                 |                                                   |                                |    |              |
|-----------------|-----------------|---------------------------------------------------|--------------------------------|----|--------------|
| <i>TBK1</i>     | <i>TBK1</i>     | TANK binding kinase 1                             | Immunodeficiency               | 12 | NM_013254    |
| <i>ACP5</i>     | <i>ACP5</i>     | Acid phosphatase-5/tartrate-resistant phosphatase | Interferonopathies             | 19 | NM_001111034 |
| <i>ADAR</i>     | <i>ADAR1</i>    | Adenosine deaminase, RNA specific                 | Interferonopathies             | 1  | NM_001111    |
| <i>DDX58</i>    | <i>DDX58</i>    | DEx/D/H-box helicase 58                           | Interferonopathies             | 9  | NM_014314    |
| <i>DNASE1</i>   | <i>DNASE1</i>   | Deoxyribonuclease 1                               | Interferonopathies             | 16 | NM_001351825 |
| <i>DNASE1L3</i> | <i>DNASE1L3</i> | Deoxyribonuclease I-like 3                        | Interferonopathies             | 3  | NM_004944    |
| <i>DNASE2</i>   | <i>DNaseII</i>  | Deoxyribonuclease 2, lysosomal                    | Interferonopathies             | 19 | NM_001375    |
| <i>IFIH1</i>    | <i>IFIH1</i>    | Interferon induced with helicase C domain 1       | Interferonopathies             | 2  | NM_022168    |
| <i>ISG15</i>    | <i>ISG15</i>    | ISG15 ubiquitin-like modifier                     | Interferonopathies             | 1  | NM_005101    |
| <i>NDUFS1</i>   | <i>NDUFS1</i>   | NADH:ubiquinone oxidoreductase core subunit S1    | White matter metabolic disease | 2  | NM_005006    |
| <i>NDUFS2</i>   | <i>NDUFS2</i>   | NADH:ubiquinone oxidoreductase core subunit S2    | White matter metabolic disease | 1  | NM_004550    |
| <i>NDUFS3</i>   | <i>NDUFS3</i>   | NADH:ubiquinone oxidoreductase core subunit S3    | White matter metabolic disease | 11 | NM_004551    |
| <i>NDUFS4</i>   | <i>NDUFS4</i>   | NADH:ubiquinone oxidoreductase subunit S4         | White matter metabolic disease | 5  | NM_002495    |
| <i>NDUFS5</i>   | <i>NDUFS5</i>   | NADH:ubiquinone oxidoreductase subunit S5         | White matter metabolic disease | 1  | NM_004552    |
| <i>NDUFS6</i>   | <i>NDUFS6</i>   | NADH:ubiquinone oxidoreductase subunit S6         | White matter metabolic disease | 5  | NM_004553    |
| <i>NDUFS7</i>   | <i>NDUFS7</i>   | NADH:ubiquinone oxidoreductase subunit S6         | White matter metabolic disease | 5  | NM_004553    |
| <i>NDUFS8</i>   | <i>NDUFS8</i>   | NADH:ubiquinone oxidoreductase core subunit S8    | White matter metabolic disease | 11 | NM_002496    |
| <i>POMP</i>     | <i>POMP</i>     | Proteasome maturation protein                     | Interferonopathies             | 13 | NM_015932    |
| <i>PRKCD</i>    | <i>PRKCD</i>    | Protein kinase C delta                            | Interferonopathies             | 3  | NM_001316327 |
| <i>PSMB3</i>    | <i>PSMB3</i>    | Proteasome subunit beta 3                         | Interferonopathies             | 17 | NM_002795    |
| <i>PSMB4</i>    | <i>PSMB4</i>    | Proteasome subunit beta 4                         | Interferonopathies             | 1  | NM_002796    |
| <i>PSMB8</i>    | <i>PSMB8</i>    | Proteasome subunit beta 8                         | Interferonopathies             | 6  | NM_148919    |

|                 |                 |                                                                                 |                                     |    |           |
|-----------------|-----------------|---------------------------------------------------------------------------------|-------------------------------------|----|-----------|
| <i>PSMB9</i>    | <i>PSMB9</i>    | Proteasome subunit beta 9                                                       | Interferonopathies                  | 6  | NM_002800 |
| <i>RAB27A</i>   | <i>RAB27A</i>   | RAB27A, member RAS oncogene family                                              | Haemophagocytic lymphohistiocytosis | 15 | NM_004580 |
| <i>RNASEH2A</i> | <i>RNASEH2A</i> | Ribonuclease H2 subunit A                                                       | Interferonopathies                  | 19 | NM_006397 |
| <i>RNASEH2B</i> | <i>RNASEH2B</i> | Ribonuclease H2 subunit B                                                       | Interferonopathies                  | 13 | NM_024570 |
| <i>RNASEH2C</i> | <i>RNASEH2C</i> | Ribonuclease H2 subunit C                                                       | Interferonopathies                  | 11 | NM_032193 |
| <i>SAMHD1</i>   | <i>SAMHD1</i>   | SAM and HD domain containing deoxynucleoside triphosphate triphosphohydrolase 1 | Interferonopathies                  | 20 | NM_015474 |
| <i>SKIV2L</i>   | <i>SKIV2L</i>   | Ski2 like RNA helicase                                                          | Immunodeficiency                    | 6  | NM_006929 |
| <i>STAT2</i>    | <i>STAT2</i>    | Signal transducer and activator of transcription 2                              | Immunodeficiency                    | 12 | NM_005419 |
| <i>TMEM173</i>  | <i>TMEM173</i>  | Transmembrane protein 173                                                       | Interferonopathies                  | 5  | NM_198282 |
| <i>TREX1</i>    | <i>TREX1</i>    | three prime repair exonuclease 1                                                | Interferonopathies                  | 3  | NM_016381 |
| <i>USP18</i>    | <i>USP18</i>    | Ubiquitin specific peptidase 18                                                 | Interferonopathies                  | 22 | NM_017414 |
| <i>EGR2</i>     | <i>EGR2</i>     | Early growth response 2                                                         | Neuropathies                        | 10 | NM_000399 |
| <i>LMNA</i>     | <i>LMNA</i>     | Lamin A/C                                                                       | Neuropathies                        | 1  | NM_170707 |
| <i>LMNB1</i>    | <i>LMNB1</i>    | Lamin B1                                                                        | Neuropathies                        | 5  | NM_005573 |
| <i>GJB1</i>     | <i>GJB1</i>     | Gap junction protein beta 1                                                     | Neuropathies                        | X  | NM_000166 |
| <i>MFN2</i>     | <i>MFN2</i>     | Mitofusin 2                                                                     | Neuropathies                        | 1  | NM_014874 |
| <i>MPZ</i>      | <i>MPZ</i>      | Myelin protein zero                                                             | Neuropathies                        | 1  | NM_000530 |
| <i>NEFL</i>     | <i>NEFL</i>     | Neurofilament light                                                             | Neuropathies                        | 8  | NM_006158 |
| <i>NF1</i>      | <i>NF1</i>      | Neurofibromin 1                                                                 | Neuropathies                        | 17 | NM_000267 |
| <i>PMP22</i>    | <i>PMP22</i>    | Peripheral myelin protein 22                                                    | Neuropathies                        | 17 | NM_000304 |
| <i>PRX</i>      | <i>PRX</i>      | Periaxin                                                                        | Neuropathies                        | 19 | NM_020956 |
| <i>TSC1</i>     | <i>TSC1</i>     | TSC complex subunit 1                                                           | Neuropathies                        | 9  | NM_000368 |
| <i>TSC2</i>     | <i>TSC2</i>     | TSC complex subunit 2                                                           | Neuropathies                        | 16 | NM_000548 |
| <i>TTC37</i>    | <i>TTC37</i>    | Tetratricopeptide repeat domain 37                                              | Neuropathies                        | 5  | NM_014639 |
| <i>LYST</i>     | <i>LYST</i>     | Lysosomal trafficking regulator                                                 | White matter and metabolic diseases | 1  | NM_000081 |
| <i>ATP7B</i>    | <i>ATP7B</i>    | ATPase copper transporting beta                                                 | White matter and metabolic diseases | 13 | NM_000053 |

|                |                |                                                                         |                                     |    |              |
|----------------|----------------|-------------------------------------------------------------------------|-------------------------------------|----|--------------|
| <i>CORO1A</i>  | <i>CORO1A</i>  | Coronin 1A                                                              | White matter and metabolic diseases | 16 | NM_007074    |
| <i>CPT2</i>    | <i>CPT2</i>    | Carnitine palmitoyltransferase 2                                        | White matter and metabolic diseases | 1  | NM_000098    |
| <i>FOLR1</i>   | <i>FOLR1</i>   | Folate receptor 1                                                       | White matter and metabolic diseases | 11 | NM_016725    |
| <i>HMBS</i>    | <i>HMBS</i>    | Hydroxymethylbilane synthase                                            | White matter and metabolic diseases | 11 | NM_000190    |
| <i>PHYH</i>    | <i>PHYH</i>    | Phytanoyl-CoA 2-hydroxylase                                             | White matter and metabolic diseases | 10 | NM_001037537 |
| <i>ARX</i>     | <i>ARX</i>     | Aristaless related homeobox                                             | White matter and metabolic diseases | X  | NM_139058    |
| <i>ISCA2</i>   | <i>ISCA2</i>   | Iron-sulfur cluster assembly 2                                          | White matter and metabolic diseases | 14 | NM_194279    |
| <i>AARS2</i>   | <i>AARS2</i>   | Alanyl-tRNA synthetase 2, mitochondrial                                 | White matter and metabolic diseases | 6  | NM_020745    |
| <i>ABCD1</i>   | <i>ABCD1</i>   | ATP binding cassette subfamily D member 1                               | White matter and metabolic diseases | X  | NM_000033    |
| <i>ACOX1</i>   | <i>ACOX1</i>   | Acyl-CoA oxidase 1                                                      | White matter and metabolic diseases | 17 | NM_001185039 |
| <i>ADCK3</i>   | <i>ADCK3</i>   | Coenzyme Q8A                                                            | White matter and metabolic diseases | 1  | NM_020247    |
| <i>AIFM1</i>   | <i>AIFM1</i>   | Apoptosis inducing factor mitochondria associated 1                     | White matter and metabolic diseases | X  | NM_001130846 |
| <i>AIMP1</i>   | <i>AIMP1</i>   | Aminoacyl tRNA synthetase complex interacting multifunctional protein 1 | White matter and metabolic diseases | 4  | NM_004757    |
| <i>ALDH3A2</i> | <i>ALDH3A2</i> | Aldehyde dehydrogenase 3 family member A2                               | White matter and metabolic diseases | 17 | NM_000382    |
| <i>ARSA</i>    | <i>ARSA</i>    | Arylsulfatase A                                                         | White matter and metabolic diseases | 22 | NM_000487    |
| <i>ASPA</i>    | <i>ASPA</i>    | Aspartoacylase                                                          | White matter and metabolic diseases | 17 | NM_000049    |
| <i>ATPAF2</i>  | <i>ATPAF2</i>  | ATP synthase mitochondrial F1 complex assembly factor 2                 | White matter and metabolic diseases | 17 | NM_145691    |
| <i>BCS1L</i>   | <i>BCS1L</i>   | BCS1 homolog, ubiquinol-cytochrome c reductase complex chaperone        | White matter and metabolic diseases | 2  | NM_004328    |
| <i>BOLA3</i>   | <i>BOLA3</i>   | BolA family member 3                                                    | White matter and metabolic diseases | 2  | NM_212552    |
| <i>BTD</i>     | <i>BTD</i>     | Biotinidase                                                             | White matter and metabolic diseases | 3  | NM_000060    |

|                |                |                                                                 |                                     |    |              |
|----------------|----------------|-----------------------------------------------------------------|-------------------------------------|----|--------------|
| <i>CLCN2</i>   | <i>CLCN2</i>   | Chloride voltage-gated channel 2                                | White matter and metabolic diseases | 3  | NM_001171087 |
| <i>COQ2</i>    | <i>COQ2</i>    | Coenzyme Q2, polyprenyltransferase                              | White matter and metabolic diseases | 4  | NM_015697    |
| <i>COQ9</i>    | <i>COQ9</i>    | Coenzyme Q9                                                     | White matter and metabolic diseases | 16 | NM_020312    |
| <i>COX10</i>   | <i>COX10</i>   | Cytochrome c oxidase assembly factor heme A:farnesyltransferase | White matter and metabolic diseases | 17 | NM_001303    |
| <i>COX15</i>   | <i>COX15</i>   | Cytochrome c oxidase assembly homolog COX15                     | White matter and metabolic diseases | 10 | NM_078470    |
| <i>CSF1R</i>   | <i>CSF1R</i>   | Colony stimulating factor 1 receptor                            | White matter and metabolic diseases | 5  | NM_005211    |
| <i>CST3</i>    | <i>CST3</i>    | Cystatin C                                                      | White matter and metabolic diseases | 20 | NM_000099    |
| <i>CTC1</i>    | <i>CTC1</i>    | CST telomere replication complex component 1                    | White matter and metabolic diseases | 17 | NM_025099    |
| <i>CYP27A1</i> | <i>CYP27A1</i> | Cytochrome P450 family 27 subfamily A member 1                  | White matter and metabolic diseases | 2  | NM_000784    |
| <i>DARS</i>    | <i>DARS</i>    | Aspartyl-tRNA synthetase                                        | White matter and metabolic diseases | 2  | NM_001349    |
| <i>DARS2</i>   | <i>DARS2</i>   | Aspartyl-tRNA synthetase 2, mitochondrial                       | White matter and metabolic diseases | 1  | NM_018122    |
| <i>DGUOK</i>   | <i>DGUOK</i>   | Deoxyguanosine kinase                                           | White matter and metabolic diseases | 2  | NM_001318859 |
| <i>EARS2</i>   | <i>EARS2</i>   | Glutamyl-tRNA synthetase 2, mitochondrial                       | White matter and metabolic diseases | 16 | NM_133451    |
| <i>EIF2B1</i>  | <i>EIF2B1</i>  | Eukaryotic translation initiation factor 2B subunit alpha       | White matter and metabolic diseases | 12 | NM_001414    |
| <i>EIF2B2</i>  | <i>EIF2B2</i>  | Eukaryotic translation initiation factor 2B subunit beta        | White matter and metabolic diseases | 14 | NM_014239    |
| <i>EIF2B3</i>  | <i>EIF2B3</i>  | Eukaryotic translation initiation factor 2B subunit gamma       | White matter and metabolic diseases | 1  | NM_020365    |
| <i>EIF2B4</i>  | <i>EIF2B4</i>  | Eukaryotic translation initiation factor 2B subunit delta       | White matter and metabolic diseases | 2  | NM_001034116 |
| <i>EIF2B5</i>  | <i>EIF2B5</i>  | Eukaryotic translation initiation factor 2B subunit epsilon     | White matter and metabolic diseases | 3  | NM_003907    |

|                |                |                                                              |                                     |    |              |
|----------------|----------------|--------------------------------------------------------------|-------------------------------------|----|--------------|
| <i>ERCC2</i>   | <i>ERCC2</i>   | ERCC excision repair 2, TFIIH core complex helicase subunit  | White matter and metabolic diseases | 19 | NM_000400    |
| <i>ERCC3</i>   | <i>ERCC3</i>   | ERCC excision repair 3, TFIIH core complex helicase subunit  | White matter and metabolic diseases | 2  | NM_000122    |
| <i>ERCC6</i>   | <i>ERCC6</i>   | ERCC excision repair 6, chromatin remodeling factor          | White matter and metabolic diseases | 10 | NM_000124    |
| <i>ERCC8</i>   | <i>ERCC8</i>   | ERCC excision repair 8, CSA ubiquitin ligase complex subunit | White matter and metabolic diseases | 5  | NM_000082    |
| <i>ETFDH</i>   | <i>ETFDH</i>   | Electron transfer flavoprotein dehydrogenase                 | White matter and metabolic diseases | 4  | NM_001281737 |
| <i>EXOSC8</i>  | <i>EXOSC8</i>  | Exosome component 8                                          | White matter and metabolic diseases | 13 | NM_181503    |
| <i>FAM126A</i> | <i>FAM126A</i> | Family with sequence similarity 126 member A                 | White matter and metabolic diseases | 7  | NM_032581    |
| <i>FUCA1</i>   | <i>FUCA1</i>   | Alpha-L-fucosidase 1                                         | White matter and metabolic diseases | 1  | NM_000147    |
| <i>FXN</i>     | <i>FXN</i>     | Frataxin                                                     | White matter and metabolic diseases | 9  | NM_000144    |
| <i>GALC</i>    | <i>GALC</i>    | Galactosylceramidase                                         | White matter and metabolic diseases | 14 | NM_000153    |
| <i>GBE1</i>    | <i>GBE1</i>    | 1,4-alpha-glucan branching enzyme 1                          | White matter and metabolic diseases | 3  | NM_000158    |
| <i>GFAP</i>    | <i>GFAP</i>    | Glial fibrillary acidic protein                              | White matter and metabolic diseases | 17 | NM_002055    |
| <i>GFM1</i>    | <i>GFM1</i>    | Elongation factor mitochondrial G1                           | White matter and metabolic diseases | 3  | NM_024996    |
| <i>GJC2</i>    | <i>GJC2</i>    | Gap junction protein gamma 2                                 | White matter and metabolic diseases | 1  | NM_020435    |
| <i>GLA</i>     | <i>GLA</i>     | Galactosidase alpha                                          | White matter and metabolic diseases | X  | NM_000169    |
| <i>GTF2H5</i>  | <i>GTF2H5</i>  | General transcription factor IIH subunit 5                   | White matter and metabolic diseases | 6  | NM_207118    |
| <i>HEPACAM</i> | <i>HEPACAM</i> | Hepatic and glial cell adhesion molecule                     | White matter and metabolic diseases | 11 | NM_152722    |
| <i>HFE</i>     | <i>HFE</i>     | Homeostatic iron regulator                                   | White matter and metabolic diseases | 6  | NM_000410    |
| <i>HSD17B4</i> | <i>HSD17B4</i> | Hydroxysteroid 17-beta dehydrogenase 4                       | White matter and metabolic diseases | 5  | NM_000414    |
| <i>IBA57</i>   | <i>IBA57</i>   | IBA57, iron-sulfur cluster assembly                          | White matter and metabolic diseases | 1  | NM_001010867 |
| <i>LONP1</i>   | <i>LONP1</i>   | Lon peptidase 1, mitochondrial                               | White matter and metabolic diseases | 16 | NM_004793    |
| <i>MLC1</i>    | <i>MLC1</i>    | Megalencephalic leukoencephalopathy                          | White matter and metabolic diseases | 22 | NM_015166    |

|                |                |                                                                   |                                        |    |           |
|----------------|----------------|-------------------------------------------------------------------|----------------------------------------|----|-----------|
|                |                | with subcortical<br>cysts 1                                       |                                        |    |           |
| <i>MPLKIP</i>  | <i>MPLKIP</i>  | M-phase specific<br>PLK1 interacting<br>protein                   | White matter and<br>metabolic diseases | 7  | NM_138701 |
| <i>MRPS16</i>  | <i>MRPS16</i>  | Mitochondrial<br>ribosomal protein<br>S16                         | White matter and<br>metabolic diseases | 10 | NM_016065 |
| <i>NDUFAF1</i> | <i>NDUFAF1</i> | NADH:ubiquinone<br>oxidoreductase<br>complex assembly<br>factor 1 | White matter and<br>metabolic diseases | 15 | NM_016013 |
| <i>NDUFV1</i>  | <i>NDUFV1</i>  | NADH:ubiquinone<br>oxidoreductase core<br>subunit V1              | White matter and<br>metabolic diseases | 11 | NM_007103 |
| <i>NUBPL</i>   | <i>NUBPL</i>   | Nucleotide binding<br>protein like                                | White matter and<br>metabolic diseases | 14 | NM_025152 |
| <i>PARN</i>    | <i>PARN</i>    | Poly(A)-specific<br>ribonuclease                                  | White matter and<br>metabolic diseases | 16 | NM_002582 |
| <i>PDHA1</i>   | <i>PDHA1</i>   | Pyruvate<br>dehydrogenase E1<br>alpha 1 subunit                   | White matter and<br>metabolic diseases | x  | NM_000284 |
| <i>PEX1</i>    | <i>PEX1</i>    | Peroxisomal<br>biogenesis factor 1                                | White matter and<br>metabolic diseases | 7  | NM_000466 |
| <i>PEX10</i>   | <i>PEX10</i>   | Peroxisomal<br>biogenesis factor 10                               | White matter and<br>metabolic diseases | 1  | NM_153818 |
| <i>PEX11A</i>  | <i>PEX11A</i>  | Peroxisomal<br>biogenesis factor 11<br>alpha                      | White matter and<br>metabolic diseases | 15 | NM_003847 |
| <i>PEX11B</i>  | <i>PEX11B</i>  | Peroxisomal<br>biogenesis factor 11<br>beta                       | White matter and<br>metabolic diseases | 1  | NM_003846 |
| <i>PEX12</i>   | <i>PEX12</i>   | Peroxisomal<br>biogenesis factor 12                               | White matter and<br>metabolic diseases | 17 | NM_000286 |
| <i>PEX13</i>   | <i>PEX13</i>   | Peroxisomal<br>biogenesis factor 13                               | White matter and<br>metabolic diseases | 2  | NM_002618 |
| <i>PEX14</i>   | <i>PEX14</i>   | Peroxisomal<br>biogenesis factor 14                               | White matter and<br>metabolic diseases | 1  | NM_004565 |
| <i>PEX16</i>   | <i>PEX16</i>   | Peroxisomal<br>biogenesis factor 16                               | White matter and<br>metabolic diseases | 11 | NM_057174 |
| <i>PEX2</i>    | <i>PEX2</i>    | Peroxisomal<br>biogenesis factor 2                                | White matter and<br>metabolic diseases | 8  | NM_000318 |
| <i>PEX3</i>    | <i>PEX3</i>    | Peroxisomal<br>biogenesis factor 3                                | White matter and<br>metabolic diseases | 6  | NM_003630 |
| <i>PEX26</i>   | <i>PEX26</i>   | Peroxisomal<br>biogenesis factor 26                               | White matter and<br>metabolic diseases | 22 | NM_017929 |
| <i>PEX5</i>    | <i>PEX5</i>    | Peroxisomal<br>biogenesis factor 5                                | White matter and<br>metabolic diseases | 12 | NM_000319 |
| <i>PEX6</i>    | <i>PEX6</i>    | Peroxisomal<br>biogenesis factor 6                                | White matter and<br>metabolic diseases | 6  | NM_000287 |
| <i>PEX7</i>    | <i>PEX7</i>    | Peroxisomal<br>biogenesis factor 7                                | White matter and<br>metabolic diseases | 6  | NM_000288 |
| <i>PGM3</i>    | <i>PGM3</i>    | Phosphoglucomutase<br>3                                           | White matter and<br>metabolic diseases | 6  | NM_015599 |

|                |                |                                                                |                                     |    |              |
|----------------|----------------|----------------------------------------------------------------|-------------------------------------|----|--------------|
| <i>PLP1</i>    | <i>PLP1</i>    | Proteolipid protein 1                                          | White matter and metabolic diseases | x  | NM_000533    |
| <i>POLG</i>    | <i>POLG</i>    | DNA polymerase gamma, catalytic subunit                        | White matter and metabolic diseases | 15 | NM_002693    |
| <i>POLG2</i>   | <i>POLG2</i>   | DNA polymerase gamma 2, accessory subunit                      | White matter and metabolic diseases | 17 | NM_007215    |
| <i>POLR1C</i>  | <i>POLR1C</i>  | POLR1C                                                         | White matter and metabolic diseases | 6  | NM_004875    |
| <i>POLR3A</i>  | <i>POLR3A</i>  | RNA polymerase III subunit A                                   | White matter and metabolic diseases | 10 | NM_007055    |
| <i>POLR3B</i>  | <i>POLR3B</i>  | RNA polymerase III subunit B                                   | White matter and metabolic diseases | 12 | NM_018082    |
| <i>PSAP</i>    | <i>PSAP</i>    | Prosaposin                                                     | White matter and metabolic diseases | 10 | NM_002778    |
| <i>PYCR2</i>   | <i>PYCR2</i>   | Pyrroline-5-carboxylate reductase 2                            | White matter and metabolic diseases | 1  | NM_013328    |
| <i>RARS</i>    | <i>RARS</i>    | Arginyl-tRNA synthetase                                        | White matter and metabolic diseases | 5  | NM_002887    |
| <i>RASGRP1</i> | <i>RASGRP1</i> | RAS guanyl releasing protein 1                                 | White matter and metabolic diseases | 15 | NM_005739    |
| <i>RNASET2</i> | <i>RNASET2</i> | Ribonuclease T2                                                | White matter and metabolic diseases | 6  | NM_003730    |
| <i>RRM2B</i>   | <i>RRM2B</i>   | Ribonucleotide reductase regulatory TP53 inducible subunit M2B | White matter and metabolic diseases | 8  | NM_001172477 |
| <i>SCN9A</i>   | <i>SCN9A</i>   | Sodium voltage-gated channel alpha subunit 9                   | White matter and metabolic diseases | 2  | NM_002977    |
| <i>SCO1</i>    | <i>SCO1</i>    | SCO1, cytochrome c oxidase assembly protein                    | White matter and metabolic diseases | 17 | NM_004589    |
| <i>SCO2</i>    | <i>SCO2</i>    | SCO2, cytochrome c oxidase assembly protein                    | White matter and metabolic diseases | 22 | NM_005138    |
| <i>SCP2</i>    | <i>SCP2</i>    | Sterol carrier protein 2                                       | White matter and metabolic diseases | 1  | NM_002979    |
| <i>SDHAF1</i>  | <i>SDHAF1</i>  | succinate dehydrogenase complex assembly factor 1              | White matter and metabolic diseases | 19 | NM_001042631 |
| <i>SDHB</i>    | <i>SDHB</i>    | succinate dehydrogenase complex iron sulfur subunit B          | White matter and metabolic diseases | 1  | NM_003000    |
| <i>SLC16A2</i> | <i>SLC16A2</i> | Solute carrier family 16 member 2                              | White matter and metabolic diseases | x  | NM_006517    |
| <i>SLC17A5</i> | <i>SLC17A5</i> | Solute carrier family 17 member 5                              | White matter and metabolic diseases | 6  | NM_012434    |
| <i>SLCIA4</i>  | <i>SLCIA4</i>  | Solute carrier family 1 member 4                               | White matter and metabolic diseases | 2  | NM_003038    |

|                 |                 |                                                   |                                     |    |           |
|-----------------|-----------------|---------------------------------------------------|-------------------------------------|----|-----------|
| <i>SLC25A12</i> | <i>SLC25A12</i> | Solute carrier family 25 member 12                | White matter and metabolic diseases | 2  | NM_003705 |
| <i>SOX10</i>    | <i>SOX10</i>    | SRY-box 10                                        | White matter and metabolic diseases | 22 | NM_006941 |
| <i>SPTAN1</i>   | <i>SPTAN1</i>   | Spectrin alpha, non-erythrocytic 1                | White matter and metabolic diseases | 9  | NM_003127 |
| <i>SUCLA2</i>   | <i>SUCLA2</i>   | Succinate-CoA ligase ADP-forming beta subunit     | White matter and metabolic diseases | 13 | NM_003850 |
| <i>SUMF1</i>    | <i>SUMF1</i>    | Sulfatase modifying factor 1                      | White matter and metabolic diseases | 3  | NM_182760 |
| <i>SURF1</i>    | <i>SURF1</i>    | SURF1, cytochrome c oxidase assembly factor       | White matter and metabolic diseases | 9  | NM_003172 |
| <i>TACO1</i>    | <i>TACO1</i>    | Translational activator of cytochrome c oxidase I | White matter and metabolic diseases | 17 | NM_016360 |
| <i>TUBB4A</i>   | <i>TUBB4A</i>   | Tubulin beta 4A class IVa                         | White matter and metabolic diseases | 19 | NM_006087 |
| <i>TUFM</i>     | <i>TUFM</i>     | Tu translation elongation factor, mitochondrial   | White matter and metabolic diseases | 16 | NM_003321 |
| <i>TYMP</i>     | <i>TYMP</i>     | Thymidine phosphorylase                           | White matter and metabolic diseases | 22 | NM_001953 |
| <i>NFU1</i>     | <i>NFU1</i>     | NFU1 iron-sulfur cluster scaffold                 | White matter and metabolic diseases | 2  | NM_015700 |
| <i>SNORD118</i> | <i>SNORD118</i> | SMALL NUCLEOLAR RNA, C/D BOX, 118                 | White matter and metabolic diseases | 17 | NR_033294 |



**eTable 3.** SureDesign description of probes for NIP.

| MiSeq sequencing runs | NIP Design ID | NIP gene list version | Description                                                                      | Number of genes | Number of regions | Number of probes | Probe size (Kbp) |
|-----------------------|---------------|-----------------------|----------------------------------------------------------------------------------|-----------------|-------------------|------------------|------------------|
| Run 1                 | 3065351       | NIP 1                 | NIP1 genes                                                                       | 257             | 3448              | 23940            | 877.433          |
| Run 2                 | 3102591       | NIP 1.1               | NIP1 modified with more baits added to 54 regions in 28 genes and 1 region added | 257             | 3450              | 24547            | 895.455          |
| Run 3                 |               | NIP 1.1               |                                                                                  |                 |                   |                  |                  |
| Run 4                 |               | NIP 1.1               |                                                                                  |                 |                   |                  |                  |

**eTable 4.** Regions below the depth of coverage threshold of 30X.

*C5*= complement component 5; *CFH*= complement factor H; *CFI*= complement factor 1; *CORO1A*= coronin 1A; *NF1*= neurofibromin 1; *POMP*= proteasome maturation protein; *PTPN22*= protein tyrosine phosphatase, non-receptor type 22; *RANBP2*= RANBP2-type and C3HC4-type zinc finger containing 1; *SMAD4*= SMAD family member 4; *STAT4*= signal transducer and activator of transcription 4; *TBK1*= TANK binding kinase 1; *USP18*= ubiquitin specific peptidase 18.

| Gene          | Chromosome | Start       | Stop        | Mean reads |
|---------------|------------|-------------|-------------|------------|
|               |            | Coordinates | Coordinates |            |
| <i>C5</i>     | chr9       | 1.24E+08    | 1.24E+08    | 20.2813    |
| <i>CFH</i>    | chr1       | 1.97E+08    | 1.97E+08    | 28.1719    |
| <i>CFI</i>    | chr4       | 1.11E+08    | 1.11E+08    | 20.9531    |
| <i>CORO1A</i> | chr16      | 30200112    | 30200352    | 2.53125    |
| <i>NF1</i>    | chr17      | 29548982    | 29549162    | 15.7031    |
| <i>NF1</i>    | chr17      | 29548796    | 29548976    | 26.3906    |
| <i>POMP</i>   | chr13      | 29238585    | 29238765    | 8.17188    |
| <i>PTPN22</i> | chr1       | 1.14E+08    | 1.14E+08    | 1.03125    |
| <i>RANBP2</i> | chr2       | 1.09E+08    | 1.09E+08    | 13.7188    |
| <i>RANBP2</i> | chr2       | 1.09E+08    | 1.09E+08    | 14.5625    |
| <i>RANBP2</i> | chr2       | 1.09E+08    | 1.09E+08    | 20.7031    |
| <i>RANBP2</i> | chr2       | 1.09E+08    | 1.09E+08    | 21.9063    |
| <i>RANBP2</i> | chr2       | 1.09E+08    | 1.09E+08    | 23.6719    |

|               |       |          |          |         |
|---------------|-------|----------|----------|---------|
| <i>RANBP2</i> | chr2  | 1.09E+08 | 1.09E+08 | 26.9375 |
| <i>RANBP2</i> | chr2  | 1.09E+08 | 1.09E+08 | 27.8906 |
| <i>RANBP2</i> | chr2  | 1.09E+08 | 1.09E+08 | 28.6094 |
| <i>SMAD4</i>  | chr18 | 48578898 | 48579018 | 0.73438 |
| <i>STAT4</i>  | chr2  | 1.92E+08 | 1.92E+08 | 25.8281 |
| <i>TBK1</i>   | chr12 | 64890076 | 64890256 | 3.3125  |
| <i>USP18</i>  | chr22 | 18649941 | 18650181 | 6.0625  |

**eTable 5.** List of regions with more baits added to improve coverage.

| <b>Gene</b>    | <b>Chromosome</b> | <b>Start Coordinates</b> | <b>Stop Coordinates</b> |
|----------------|-------------------|--------------------------|-------------------------|
| <i>C5</i>      | chr9              | 123744892                | 123745132               |
| <i>C5</i>      | chr9              | 123800134                | 123800314               |
| <i>CECR1</i>   | chr22             | 17700000                 | 17700800                |
| <i>CECR1</i>   | chr22             | 17702200                 | 17702900                |
| <i>CFH</i>     | chr1              | 196716221                | 196716461               |
| <i>CFI</i>     | chr4              | 110678838                | 110679193               |
| <i>CORO1A</i>  | chr16             | 30200112                 | 30200352                |
| <i>DARS</i>    | chr2              | 136670005                | 136670185               |
| <i>DARS2</i>   | chr1              | 173814307                | 173814487               |
| <i>ERCC8</i>   | chr5              | 60200569                 | 60200749                |
| <i>FAS</i>     | chr10             | 90771600                 | 90772000                |
| <i>FBN2</i>    | chr5              | 127642770                | 127642950               |
| <i>GUCY1A3</i> | chr4              | 156625024                | 156625204               |
| <i>HSD17B4</i> | chr5              | 118807272                | 118807452               |
| <i>LYST</i>    | chr1              | 235875330                | 235875570               |
| <i>LYST</i>    | chr1              | 235963562                | 235963742               |
| <i>MYO5A</i>   | chr15             | 52640928                 | 52641108                |
| <i>MYO5A</i>   | chr15             | 52688463                 | 52688643                |
| <i>NF1</i>     | chr17             | 29541415                 | 29541655                |
| <i>NF1</i>     | chr17             | 29548796                 | 29548976                |
| <i>NF1</i>     | chr17             | 29548982                 | 29549162                |
| <i>NF1</i>     | chr17             | 29579896                 | 29580076                |
| <i>PARN</i>    | chr16             | 14678536                 | 14678716                |
| <i>PEX1</i>    | chr7              | 92116722                 | 92116902                |
| <i>PEX1</i>    | chr7              | 92140189                 | 92140429                |

|                |       |           |           |
|----------------|-------|-----------|-----------|
| <i>Pomp</i>    | chr13 | 29238585  | 29238765  |
| <i>RANBP2</i>  | chr2  | 109345531 | 109345711 |
| <i>RANBP2</i>  | chr2  | 109347165 | 109347405 |
| <i>RANBP2</i>  | chr2  | 109347733 | 109347973 |
| <i>RANBP2</i>  | chr2  | 109363120 | 109363300 |
| <i>RANBP2</i>  | chr2  | 109365360 | 109365600 |
| <i>RANBP2</i>  | chr2  | 109367690 | 109367930 |
| <i>RANBP2</i>  | chr2  | 109368268 | 109368508 |
| <i>RANBP2</i>  | chr2  | 109369827 | 109370067 |
| <i>RANBP2</i>  | chr2  | 109370233 | 109370473 |
| <i>RANBP2</i>  | chr2  | 109371583 | 109371763 |
| <i>RANBP2</i>  | chr2  | 109378513 | 109378693 |
| <i>SH2D1A</i>  | chrX  | 123505130 | 123505310 |
| <i>SLC17A5</i> | chr6  | 74345043  | 74345283  |
| <i>SMAD4</i>   | chr18 | 48578898  | 48579018  |
| <i>STAT4</i>   | chr2  | 191923375 | 191923555 |
| <i>TBK1</i>    | chr12 | 64853918  | 64854158  |
| <i>TBK1</i>    | chr12 | 64883769  | 64883949  |
| <i>TBK1</i>    | chr12 | 64890076  | 64890256  |
| <i>TRNT1</i>   | chr3  | 3186210   | 3186450   |
| <i>TTC37</i>   | chr5  | 94842586  | 94842766  |
| <i>USP18</i>   | chr22 | 18649971  | 18650151  |
| <i>USP18</i>   | chr22 | 18650609  | 18650849  |
| <i>USP18</i>   | chr22 | 18652568  | 18652748  |
| <i>USP18</i>   | chr22 | 18653483  | 18653723  |
| <i>USP18</i>   | chr22 | 18659471  | 18659651  |
| <i>XIAP</i>    | chrX  | 123025014 | 123025194 |

**eTable 6. Clinical features and class 4 and 5 genetic variants identified on Neuroinflammation gene panel (NIP) in patients with suspected genetic neuroinflammatory disorders and unknown molecular diagnoses.** MRI=magnetic resonance imaging; GAD=glutamic acid decarboxylase; OGB=oligoclonal bands; JAK=janus kinase; HSCT=haematopoietic stem cell transplantation; HLH=haemophagocytic lymphostocytosis; ANA=antinuclear; IVIG=intravenous immunoglobulin; CT=computed tomography; CSF=cerebrospinal fluid; AD=autosomal dominant; AR=autosomal recessive. T=tolerated; B=benign; D=damaging; N=polymorphism; Het= heterozygous; Hom= Homozygous; Hemi= hemizyosity; XLR= X-linked recessive; XL= X-linked.

| Patient number | Sex      | Age (Years) | Gene          | Nucleotide Change | Amino Acid Change   | Predicted pathogenicity | Mode of inheritance/ Zygosity | Variant Classification | Clinical Features, laboratory investigations and treatment                                                                                                                                                                                                                                                                                                                                                                                                                                                                                                                                                                                   | Clinical impact of NIP and suspected diagnosis after genetic testing |
|----------------|----------|-------------|---------------|-------------------|---------------------|-------------------------|-------------------------------|------------------------|----------------------------------------------------------------------------------------------------------------------------------------------------------------------------------------------------------------------------------------------------------------------------------------------------------------------------------------------------------------------------------------------------------------------------------------------------------------------------------------------------------------------------------------------------------------------------------------------------------------------------------------------|----------------------------------------------------------------------|
| 17             | F        | 18          | <i>NLRP3</i>  | c.2557A>G         | p.Thr853Ala         | T/B/D                   | AD/Het                        | 3                      | <p><b>Clinical features:</b> Recurrent episodes of encephalopathy, seizures, psychiatric symptoms, left homonymous quadrantanopia, diabetes, autoimmune thyroiditis. No other systemic symptoms or other organ involvement. Relapsing disease course.</p> <p><b>Investigations:</b> MRI brain showed abnormal signal and atrophic changes in right occipital lobe with extension in right thalamus and mesiotemporal lobe. Atrophic changes subsequently extended to right cerebellar hemisphere and right parietal lobe. Positive GAD antibodies, negative other autoantibodies. No acute phase response.</p> <p><b>Treatment:</b> IVIG</p> | Unclassified neuroinflammatory disease                               |
|                |          |             | <i>NLRC4</i>  | c.2785G>T         | p.Ala929Ser         | T/B/.                   | AD/Het                        | 3                      |                                                                                                                                                                                                                                                                                                                                                                                                                                                                                                                                                                                                                                              |                                                                      |
|                |          |             | <i>RANBP2</i> | c.7172C>G         | p.Thr2391Ser        | T/B/N                   | AD/Het                        | 3                      |                                                                                                                                                                                                                                                                                                                                                                                                                                                                                                                                                                                                                                              |                                                                      |
|                |          |             | <i>FBN2</i>   | c.7181T>C         | p.Ile2394Thr        | T/B/N                   | AD/Het                        | 3                      |                                                                                                                                                                                                                                                                                                                                                                                                                                                                                                                                                                                                                                              |                                                                      |
|                |          |             | <i>STX11</i>  | c.9C>A            | p.Asp3Glu           | D/D/D                   | AR/Het                        | 3                      |                                                                                                                                                                                                                                                                                                                                                                                                                                                                                                                                                                                                                                              |                                                                      |
|                |          |             | <i>TSC1</i>   | c.2194C>T         | p.His732Tyr         | D/P/A                   | AD/Het                        | 4                      |                                                                                                                                                                                                                                                                                                                                                                                                                                                                                                                                                                                                                                              |                                                                      |
|                |          |             | <i>NOTCH1</i> | c.4028C>T         | p.Ala1343Val        | T/P/D                   | AD/Het                        | 3                      |                                                                                                                                                                                                                                                                                                                                                                                                                                                                                                                                                                                                                                              |                                                                      |
|                |          |             | <i>NOTCH1</i> | c.1981G>A         | p.Gly661Ser         | T/P/D                   | AD/Het                        | 3                      |                                                                                                                                                                                                                                                                                                                                                                                                                                                                                                                                                                                                                                              |                                                                      |
|                |          |             | <i>POLG</i>   | c.158_159insGCA   | p.Gln55_Pro56insGln | ././.                   | AD;AR/Het                     | 3                      |                                                                                                                                                                                                                                                                                                                                                                                                                                                                                                                                                                                                                                              |                                                                      |
|                |          |             | <i>MEFV</i>   | c.442G>C          | p.Glu148Gln         | D/D/P                   | AD;AR/Het                     | 3                      |                                                                                                                                                                                                                                                                                                                                                                                                                                                                                                                                                                                                                                              |                                                                      |
|                |          |             | <i>RNF213</i> | c.4156G>A         | p.Asp1386Asn        | T/B/N                   | -/Het                         | 3                      |                                                                                                                                                                                                                                                                                                                                                                                                                                                                                                                                                                                                                                              |                                                                      |
| <i>DNASE2</i>  | c.134C>G | p.Ala45Gly  | T/P/N         | -/Het             | 3                   |                         |                               |                        |                                                                                                                                                                                                                                                                                                                                                                                                                                                                                                                                                                                                                                              |                                                                      |

|    |   |                |                |                    |                            |        |           |   |                                                                                                                                                                                                                                                                                                                                                                                                                                           |                                        |
|----|---|----------------|----------------|--------------------|----------------------------|--------|-----------|---|-------------------------------------------------------------------------------------------------------------------------------------------------------------------------------------------------------------------------------------------------------------------------------------------------------------------------------------------------------------------------------------------------------------------------------------------|----------------------------------------|
| 18 | M | 15             | <i>ADAR</i>    | c.577C>G           | p.Pro19<br>3Ala            | D/D/D  | AR;AD/Het | 5 | <p><b>Clinical features:</b><br/>Encephalitis triggered by influenza A, cutaneous leucocytoclastic vasculitis, peripheral lymphoedema.</p> <p><b>Investigations:</b> MRI brain showed bilateral haemorrhagic foci and brain oedema. Negative autoantibodies, normal complement studies, modestly elevated ESR (20 mm/h; RR&lt; 10 mm/h).</p> <p><b>Treatment:</b> Corticosteroids and azathioprine.</p>                                   | Likely monogenic interferonopathy.     |
|    |   |                | <i>CFHR5</i>   | c.832G>A           | p.Gly27<br>8Ser            | D/D/N  | AD/Het    | 3 |                                                                                                                                                                                                                                                                                                                                                                                                                                           |                                        |
|    |   |                | <i>TGFBR2</i>  | c.374del           | p.K128<br>Sfs*34           | ./.    | AD/Het    | 3 |                                                                                                                                                                                                                                                                                                                                                                                                                                           |                                        |
|    |   |                | <i>PEX1</i>    | c.3250A>G          | p.Met10<br>84Val           | T/P/D  | AR/Het    | 3 |                                                                                                                                                                                                                                                                                                                                                                                                                                           |                                        |
|    |   |                | <i>SPTAN1</i>  | c.1303T>G          | p.Ser43<br>5Ala            | T/B/D  | AD/Het    | 3 |                                                                                                                                                                                                                                                                                                                                                                                                                                           |                                        |
|    |   |                | <i>POLG</i>    | c.158_159insGCA    | p.Gln55<br>_Pro56insGln    | ./.    | AR;AD/Het | 3 |                                                                                                                                                                                                                                                                                                                                                                                                                                           |                                        |
|    |   |                | <i>RNF213</i>  | c.5162C>T          | p.Pro17<br>21Leu           | T./N   | -/Het     | 3 |                                                                                                                                                                                                                                                                                                                                                                                                                                           |                                        |
|    |   | <i>LPIN2</i>   | c.1801G>A      | p.Glu60<br>1Lys    | T/B/N                      | -/Het  | 3         |   |                                                                                                                                                                                                                                                                                                                                                                                                                                           |                                        |
| 19 | M | 14             | <i>FUCA1</i>   | c.106C>T           | p.Arg36<br>Cys             | D/P/D  | AR/Het    | 3 | <p><b>Clinical features:</b><br/>Recurrent acute transverse myelitis, optic neuritis, hearing loss, choreoathetosis, development delay. No other systemic symptoms or other organ involvement. Chronic relapsing disease course.</p> <p><b>Investigations:</b> MRI brain showed bilateral and symmetrical T1 hyperintense signal in the globi pallidi, bilateral mild engorgement of the deep medullary veins (more on the left) with</p> | Unclassified neuroinflammatory disease |
|    |   |                | <i>BTD</i>     | c.133G>A           | p.Gly45<br>Arg             | T/B/N  | AR/Het    | 4 |                                                                                                                                                                                                                                                                                                                                                                                                                                           |                                        |
|    |   |                | <i>PEX1</i>    | c.1579A>G          | p.Thr52<br>7Ala            | T/B/D  | AR/Het    | 3 |                                                                                                                                                                                                                                                                                                                                                                                                                                           |                                        |
|    |   |                | <i>CLEC16A</i> | c.2945G>A          | p.Ser98<br>2Asn            | D/D/D  | -/Het     | 3 |                                                                                                                                                                                                                                                                                                                                                                                                                                           |                                        |
|    |   |                | <i>POLG</i>    | c.158_159insGCAGCA | p.Gln55<br>_Pro56insGlnGln | ./.    | AD;AR/Hom | 3 |                                                                                                                                                                                                                                                                                                                                                                                                                                           |                                        |
|    |   |                | <i>LONP1</i>   | c.10A>G            | p.Ser4Gly                  | T/B/D  | AR/Het    | 3 |                                                                                                                                                                                                                                                                                                                                                                                                                                           |                                        |
|    |   |                | <i>MEFV</i>    | c.442G>C           | p.Glu14<br>8Gln            | D/D/P  | AD;AR/Het | 3 |                                                                                                                                                                                                                                                                                                                                                                                                                                           |                                        |
|    |   | <i>HSD17B4</i> | c.272G>A       | p.Gly91<br>Glu     | D/D/D                      | AR/Het | 3         |   |                                                                                                                                                                                                                                                                                                                                                                                                                                           |                                        |

|    |   |   |                |           |              |       |           |   |                                                                                                                                                                                                                                                                                                                                                                                                    |                                          |
|----|---|---|----------------|-----------|--------------|-------|-----------|---|----------------------------------------------------------------------------------------------------------------------------------------------------------------------------------------------------------------------------------------------------------------------------------------------------------------------------------------------------------------------------------------------------|------------------------------------------|
|    |   |   |                |           |              |       |           |   | some associated haemorrhagic foci, generalised brain parenchymal swelling. Negative autoantibodies and CSF OGB negative. No acute phase response.<br><b>Treatment:</b> IVIG, corticosteroids, rituximab                                                                                                                                                                                            |                                          |
| 20 | F | 3 | <i>DARS</i>    | c.1391C>T | p.Pro464Leu  | T/D/D | AR/Het    | 4 | <b>Clinical features:</b> Subcutaneous nodules, progressive ataxia, muscle weakness, lipodystrophy.<br><b>Investigations:</b> MRI brain revealed widespread leucoencephalopathy. Negative autoantibody screen and no acute phase response. Significant upregulation of interferon induced gene expression.<br><b>Treatment:</b> corticosteroids, oral JAK1/JAK2 inhibitor, mycophenolate mofetil.. | Likely monogenic interferonopathy        |
|    |   |   | <i>PRX</i>     | c.1574T>C | p.Val525Ala  | T/B/N | AD;AR/Het | 3 |                                                                                                                                                                                                                                                                                                                                                                                                    |                                          |
|    |   |   | <i>PRX</i>     | c.133C>G  | p.Arg45Gly   | D/P/D | AD;AR/Het | 3 |                                                                                                                                                                                                                                                                                                                                                                                                    |                                          |
|    |   |   | <i>CBS</i>     | c.833T>C  | p.Ile278Thr  | D/D/A | AR/Het    | 3 |                                                                                                                                                                                                                                                                                                                                                                                                    |                                          |
|    |   |   | <i>FBN2</i>    | c.6598A>G | p.Met2200Val | T/B/D | AD/Het    | 3 |                                                                                                                                                                                                                                                                                                                                                                                                    |                                          |
|    |   |   | <i>MYH11</i>   | c.3949C>A | p.Leu1317Ile | T/P/D | AD/Het    | 3 |                                                                                                                                                                                                                                                                                                                                                                                                    |                                          |
|    |   |   | <i>NDUFS3</i>  | c.475G>C  | p.Val159Leu  | T/B/D | AR/Het    | 3 |                                                                                                                                                                                                                                                                                                                                                                                                    |                                          |
|    |   |   | <i>PLCG2</i>   | c.2542C>T | p.Leu848Phe  | T/D/D | AD/Het    | 3 |                                                                                                                                                                                                                                                                                                                                                                                                    |                                          |
|    |   |   | <i>PRKG1</i>   | c.1421A>T | p.Tyr474Phe  | D/B/D | AD/Het    | 3 |                                                                                                                                                                                                                                                                                                                                                                                                    |                                          |
|    |   |   | <i>RNF213</i>  | c.5114C>A | p.Thr1705Lys | D/.D  | -/Het     | 3 |                                                                                                                                                                                                                                                                                                                                                                                                    |                                          |
|    |   |   | <i>TNFAIP3</i> | c.1105G>A | p.Ala369Thr  | T/B/N | AD/Het    | 3 |                                                                                                                                                                                                                                                                                                                                                                                                    |                                          |
| 21 | M | 8 | <i>IL1RN</i>   | c.379G>A  | p.Ala127Thr  | T/B/N | AD;AR/Het | 3 | <b>Clinical features:</b> Febrile episode followed by refractory seizures, progressive four limb motor                                                                                                                                                                                                                                                                                             | Autoimmune lymphoproliferative syndrome. |
|    |   |   | <i>LONP1</i>   | c.70C>A   | p.Leu24Met   | D/D/N | AR/Het    | 3 |                                                                                                                                                                                                                                                                                                                                                                                                    |                                          |

|    |   |    |                |           |                  |       |           |   |                                                                                                                                                                                                                                                                                                                                                                                               |                                                   |
|----|---|----|----------------|-----------|------------------|-------|-----------|---|-----------------------------------------------------------------------------------------------------------------------------------------------------------------------------------------------------------------------------------------------------------------------------------------------------------------------------------------------------------------------------------------------|---------------------------------------------------|
|    |   |    | <i>MFN2</i>    | c.58C>T   | p.His20<br>Tyr   | T/B/D | AD;AR/Het | 3 | <p>dystonic disorder following infectious gastroenteritis. History of frequent chest infections.</p> <p><b>Investigations:</b> MRI brain showed marked atrophy and signal changes followed by cystic degeneration on subsequent scans in basal ganglia, internal capsule and midbrain. Negative autoantibody screen and no acute phase response.</p> <p><b>Treatment:</b> Corticosteroids</p> | Referred to Immunology for consideration of HSCT. |
|    |   |    | <i>PEX13</i>   | c.661C>G  | p.Leu22<br>1Val  | T/B/D | AR/Het    | 3 |                                                                                                                                                                                                                                                                                                                                                                                               |                                                   |
|    |   |    | <i>POLR3A</i>  | c.3499G>C | p.Val11<br>67Leu | T/P/D | AR/Het    | 3 |                                                                                                                                                                                                                                                                                                                                                                                               |                                                   |
|    |   |    | <i>TGFBI</i>   | c.C829C>G | p.Leu27<br>7Val  | T/B/D | AD/Het    | 3 |                                                                                                                                                                                                                                                                                                                                                                                               |                                                   |
|    |   |    | <i>USP18</i>   | c.974A>G  | p.Asn32<br>5Ser  | T/B/N | AR/Het    | 3 |                                                                                                                                                                                                                                                                                                                                                                                               |                                                   |
|    |   |    | <i>COL3A1</i>  | c.1804C>A | p.Pro60<br>2Thr  | T/P/D | AD/Het    | 3 |                                                                                                                                                                                                                                                                                                                                                                                               |                                                   |
|    |   |    | <i>TMEM173</i> | c.937G>A  | p.Ala31<br>3Thr  | T/B/N | AD/Het    | 3 |                                                                                                                                                                                                                                                                                                                                                                                               |                                                   |
|    |   |    | <i>C5</i>      | c.3051G>C | p.Glu10<br>17Asp | D/D/D | AD/Het    | 3 |                                                                                                                                                                                                                                                                                                                                                                                               |                                                   |
|    |   |    | <i>FAS</i>     | c.517G>A  | p.Glu17<br>3Lys  | T/B/N | AD/Het    | 4 |                                                                                                                                                                                                                                                                                                                                                                                               |                                                   |
| 22 | M | 18 | <i>ERCC3</i>   | c.2080G>A | p.Ala69<br>4Thr  | T/B/D | AR/Het    | 3 | <p><b>Clinical features:</b> Recurrent seizures, progressive ataxia, dysarthria, loss of mobility, learning difficulties, necrotising pneumonia.</p> <p><b>Investigations:</b> MRI brain changes suggestive of chronic lymphocytic inflammation with pontine perivascular enhancement responsive to steroids (CLIPPERS) syndrome. ANA/dsDNA and complement studies normal. Blood film no</p>  | Primary HLH diagnosed posthumously                |
|    |   |    | <i>BTD</i>     | c.1171C>T | p.Pro39<br>1Ser  | T/B/N | AR/Het    | 3 |                                                                                                                                                                                                                                                                                                                                                                                               |                                                   |
|    |   |    | <i>ERCC8</i>   | c.170G>A  | p.Arg57<br>Lys   | T/B/D | AR/Het    | 3 |                                                                                                                                                                                                                                                                                                                                                                                               |                                                   |
|    |   |    | <i>FBN2</i>    | c.976C>T  | p.Pro32<br>6Ser  | T/B/D | AD/Hom    | 3 |                                                                                                                                                                                                                                                                                                                                                                                               |                                                   |
|    |   |    | <i>RRM2B</i>   | c.44C>T   | p.Pro15<br>L     | ././  | AD;AR/Het | 3 |                                                                                                                                                                                                                                                                                                                                                                                               |                                                   |
|    |   |    | <i>PRF1</i>    | c.1621del | p.M541<br>Cfs*71 | ././  | AR/Het    | 4 |                                                                                                                                                                                                                                                                                                                                                                                               |                                                   |
|    |   |    | <i>PRF1</i>    | c.82C>T   | p.Arg28<br>Cys   | D/P/N | AR/Het    | 4 |                                                                                                                                                                                                                                                                                                                                                                                               |                                                   |
|    |   |    | <i>NUBPL</i>   | c.545T>C  | p.Val18<br>2Ala  | D/P/D | AR/Het    | 3 |                                                                                                                                                                                                                                                                                                                                                                                               |                                                   |

|    |   |    |               |                 |                     |       |           |   |                                                                                                                                                                                                                                                                                                                                     |                                        |
|----|---|----|---------------|-----------------|---------------------|-------|-----------|---|-------------------------------------------------------------------------------------------------------------------------------------------------------------------------------------------------------------------------------------------------------------------------------------------------------------------------------------|----------------------------------------|
|    |   |    | <i>MYO5A</i>  | c.5065G>A       | p.Val1689Ile        | T/B/D | AR/Het    | 3 | lymphocyte vacuolation. Muscle biopsy and other metabolic disease tests-normal. Brain biopsy chronic white matter disease with dense macrophage infiltrate. History of occasional cytopaenias.<br><b>Treatment:</b> IVIG, mycophenolate mofetil, azathioprine, rituximab, natalizumab.                                              |                                        |
|    |   |    | <i>POLG</i>   | c.158_159insGCA | p.Gln55_Pro56insGln | ./.   | AD;AR/Het | 3 |                                                                                                                                                                                                                                                                                                                                     |                                        |
|    |   |    | <i>TSC2</i>   | c.4524_4526del  | p.Phe1510del        | ./.   | AD/Het    | 3 |                                                                                                                                                                                                                                                                                                                                     |                                        |
|    |   |    | <i>MYH11</i>  | c.4156A>G       | p.Thr1386Ala        | T/B/D | AD/Het    | 3 |                                                                                                                                                                                                                                                                                                                                     |                                        |
|    |   |    | <i>CTC1</i>   | c.974A>G        | p.Ser83Thr          | D/D/D | AR/Het    | 3 |                                                                                                                                                                                                                                                                                                                                     |                                        |
| 23 | F | 12 | <i>DGUOK</i>  | c.462T>A        | p.Asn154Lys         | D/D/D | AR/Het    | 4 | <b>Clinical features:</b> Facial lipodystrophy, recurrent seizures, progressive myoclonus, occasional fevers, no rashes or articular symptoms.<br><b>Investigations:</b> MRI brain no progressive white matter disease. Negative autoantibody screen.<br><b>Treatment:</b> rituximab, mycophenolate mofetil, IVIG and methotrexate. | Unclassified neuroinflammatory disease |
|    |   |    | <i>MVK</i>    | c.1129G>A       | p.Val377Ile         | T/B/A | AD;AR/Het | 4 |                                                                                                                                                                                                                                                                                                                                     |                                        |
|    |   |    | <i>RANBP2</i> | c.6362A>G       | p.Gln2121Arg        | T/D/D | AD/Het    | 3 |                                                                                                                                                                                                                                                                                                                                     |                                        |
|    |   |    | <i>RANBP2</i> | c.6680A>G       | p.Tyr2227Cys        | D/D/D | AD/Het    | 3 |                                                                                                                                                                                                                                                                                                                                     |                                        |
|    |   |    | <i>TGFBR2</i> | c.374del        | p.Lys128Sfs*34      | ./.   | AD/Het    | 3 |                                                                                                                                                                                                                                                                                                                                     |                                        |
|    |   |    | <i>CFI</i>    | c.1657C>T       | p.Pro553Ser         | T/B/N | AD;AR/Het | 3 |                                                                                                                                                                                                                                                                                                                                     |                                        |
|    |   |    | <i>PRF1</i>   | c.755A>G        | p.Asn252Ser         | T/B/N | AR/Het    | 3 |                                                                                                                                                                                                                                                                                                                                     |                                        |
|    |   |    | <i>PLCG2</i>  | c.82A>T         | p.Met28Leu          | T/P/D | AD/Het    | 3 |                                                                                                                                                                                                                                                                                                                                     |                                        |
|    |   |    | <i>IRF8</i>   | c.724T>C        | p.Tyr242His         | D/P/D | AD/Het    | 3 |                                                                                                                                                                                                                                                                                                                                     |                                        |
|    |   |    | <i>RNF213</i> | c.1208_1210del  | p.Gly405del         | ./.   | -/Het     | 3 |                                                                                                                                                                                                                                                                                                                                     |                                        |
|    |   |    | <i>USP18</i>  | c.974A>G        | p.Asn325Ser         | T/B/N | AR/Het    | 3 |                                                                                                                                                                                                                                                                                                                                     |                                        |



|             |           |                 |               |           |                  |       |           |   |                                                                                                                                                                                                                                                                                                                                                                                               |                                        |
|-------------|-----------|-----------------|---------------|-----------|------------------|-------|-----------|---|-----------------------------------------------------------------------------------------------------------------------------------------------------------------------------------------------------------------------------------------------------------------------------------------------------------------------------------------------------------------------------------------------|----------------------------------------|
| 24          | F         | 10              | <i>YYIAP1</i> | c.516G>C  | p.Met17<br>2Ile  | T/D/D | AR/Het    | 3 | <p><b>Clinical features:</b> Right sided visual loss secondary to long standing optic disc swelling and optic neuritis. No systemic symptoms or other organ involvement.</p> <p><b>Investigations:</b> MRI brain scan, nonprogressive white matter disease (non-consistent with MS). Negative autoantibody profile and no acute phase response.</p> <p><b>Treatment:</b> corticosteroids.</p> | Unclassified neuroinflammatory disease |
|             |           |                 | <i>LYST</i>   | c.1686G>C | p.Gln56<br>2His  | D/P/D | AR/Het    | 3 |                                                                                                                                                                                                                                                                                                                                                                                               |                                        |
|             |           |                 | <i>RANBP2</i> | c.7172C>G | p.Thr23<br>91Ser | T/B/N | AD/Het    | 3 |                                                                                                                                                                                                                                                                                                                                                                                               |                                        |
|             |           |                 | <i>PEXI</i>   | c.2528G>A | p.Gly84<br>3Asp  | D/D/A | AR/Het    | 4 |                                                                                                                                                                                                                                                                                                                                                                                               |                                        |
|             |           |                 | <i>ATPAF2</i> | c.511G>A  | p.Val17<br>1Met  | T/B/D | AR/Het    | 3 |                                                                                                                                                                                                                                                                                                                                                                                               |                                        |
|             |           |                 | <i>GFAP</i>   | c.650G>A  | p.Arg21<br>7Gln  | T/B/D | AD/Het    | 3 |                                                                                                                                                                                                                                                                                                                                                                                               |                                        |
|             |           |                 | <i>TRIM28</i> | c.2183CT  | p.Thr72<br>8Ile  | T/B/N | AD/Het    | 3 |                                                                                                                                                                                                                                                                                                                                                                                               |                                        |
|             |           |                 | <i>RBCK1</i>  | c.703G>A  | p.Glu23<br>5Lys  | T/B/D | AR/Het    | 3 |                                                                                                                                                                                                                                                                                                                                                                                               |                                        |
|             |           |                 | <i>USP18</i>  | c.506C>T  | p.Thr16<br>9Met  | T/B/N | AR/Het    | 3 |                                                                                                                                                                                                                                                                                                                                                                                               |                                        |
|             |           |                 | <i>ARSA</i>   | c.*96A>G  | -                | ././  | AR/Het    | 3 |                                                                                                                                                                                                                                                                                                                                                                                               |                                        |
| <i>ARSA</i> | c.1055A>G | p.Asn35<br>2Ser | T/B/P         | AR/Het    | 3                |       |           |   |                                                                                                                                                                                                                                                                                                                                                                                               |                                        |
| 25          | F         | 15              | <i>ATP7B</i>  | c.3207C>A | p.His10<br>69Gln | D/D/A | AR/Het    | 4 | <p><b>Clinical features:</b> Progressive polyneuropathy, glaucoma, spinal cord tethering, atrial septal defect, ventricular septal defect, proptosis, precocious telarche, keratosis pilaris.</p> <p><b>Investigations:</b> MRI brain and spine showed diffuse thickening of the nerve roots with Meckel's</p>                                                                                | Unclassified neuroinflammatory disease |
|             |           |                 | <i>MASP2</i>  | c.1243G>A | p.Asp41<br>5Asn  | T/B/D | AR/Het    | 3 |                                                                                                                                                                                                                                                                                                                                                                                               |                                        |
|             |           |                 | <i>CPT2</i>   | c.1763C>G | p.Ser58<br>8Cys  | D/D/D | AD;AR/Het | 3 |                                                                                                                                                                                                                                                                                                                                                                                               |                                        |
|             |           |                 | <i>LYST</i>   | c.5518T>G | p.Ser18<br>40Ala | T/B/D | AR/Het    | 3 |                                                                                                                                                                                                                                                                                                                                                                                               |                                        |
|             |           |                 | <i>DGUOK</i>  | c.4G>T    | p.Ala2Ser        | T/B/N | AR/Het    | 3 |                                                                                                                                                                                                                                                                                                                                                                                               |                                        |
|             |           |                 | <i>RANBP2</i> | c.6362A>G | p.Gln21<br>21Arg | T/D/D | AD/Het    | 3 |                                                                                                                                                                                                                                                                                                                                                                                               |                                        |

|  |  |  |               |                       |                                |       |           |   |                                                                                                                                                                                                                                                                                                                    |  |
|--|--|--|---------------|-----------------------|--------------------------------|-------|-----------|---|--------------------------------------------------------------------------------------------------------------------------------------------------------------------------------------------------------------------------------------------------------------------------------------------------------------------|--|
|  |  |  | <i>RANBP2</i> | c.6680A>G             | p.Tyr22<br>27Cys               | D/D/D | AD/Het    | 3 | caves, foramina ovale and the jugular foramina, the cauda equina, in all spinal exit foramina, the lumbar plexus and the right sciatic nerve.<br>Negative autoantibody profile and no acute phase response.<br>Negative CSF OGB and normal levels of CSF neopterin.<br><b>Treatment:</b> corticosteroids and IVIG. |  |
|  |  |  | <i>TGFBR2</i> | c.374del              | p.Lys12<br>8Sfs*34             | ././  | AD/Het    | 3 |                                                                                                                                                                                                                                                                                                                    |  |
|  |  |  | <i>MYLK</i>   | c.3706A>G             | p.Met12<br>36Val               | T/B/N | AD/Het    | 3 |                                                                                                                                                                                                                                                                                                                    |  |
|  |  |  | <i>GFM1</i>   | c.1775A>T             | p.Xaa59<br>2Leu                | ././N | AR/Het    | 3 |                                                                                                                                                                                                                                                                                                                    |  |
|  |  |  | <i>AIMP1</i>  | c.7C>T                | p.Prp3S<br>er                  | D/./N | AR/Het    | 3 |                                                                                                                                                                                                                                                                                                                    |  |
|  |  |  | <i>C6</i>     | c.2435C>T             | p.Thr81<br>2Ile                | D/D/D | -/Het     | 3 |                                                                                                                                                                                                                                                                                                                    |  |
|  |  |  | <i>C6</i>     | c.1555G>A             | p.Asp51<br>9Asn                | D/D/D | -/Het     | 3 |                                                                                                                                                                                                                                                                                                                    |  |
|  |  |  | <i>TGFBI</i>  | c.1954G>C             | p.Glu65<br>2Gln                | D/B/D | AD/Het    | 3 |                                                                                                                                                                                                                                                                                                                    |  |
|  |  |  | <i>POLRIC</i> | c.944C>T              | p.Ala31<br>5Val                | D/P/N | AR/Het    | 3 |                                                                                                                                                                                                                                                                                                                    |  |
|  |  |  | <i>NEFL</i>   | c.1576G>A             | p.Glu52<br>6Lys                | ./B/. | AD;AR/Het | 3 |                                                                                                                                                                                                                                                                                                                    |  |
|  |  |  | <i>ERCC6</i>  | c.3659C>T             | p.Thr12<br>20Ile               | T/B/N | AD;AR/Het | 3 |                                                                                                                                                                                                                                                                                                                    |  |
|  |  |  | <i>GALC</i>   | c.1403C>G             | p.Thr46<br>8Ser                | D/D/D | AR/Het    | 3 |                                                                                                                                                                                                                                                                                                                    |  |
|  |  |  | <i>POLG</i>   | c.58_159in<br>sGCAGCA | p.Gln55<br>_Pro56i<br>nsGlnGln | ././  | AD;AR/Het | 3 |                                                                                                                                                                                                                                                                                                                    |  |
|  |  |  | <i>POLG</i>   | c.125G>A              | p.Arg42<br>Gln                 | T/B/N | AD;AR/Het | 3 |                                                                                                                                                                                                                                                                                                                    |  |
|  |  |  | <i>TSC2</i>   | c.3914C>T             | p.Pro13<br>05Leu               | T/B/N | AD/Het    | 3 |                                                                                                                                                                                                                                                                                                                    |  |
|  |  |  | <i>MEFV</i>   | c.586G>T              | p.Gly19<br>6Trp                | D/B/N | AD;AR/Het | 3 |                                                                                                                                                                                                                                                                                                                    |  |

|              |           |                 |                      |           |                          |       |                |   |                                                                                                                                                                                                                                                                                                                                                                                                                                                                                                |                                                                                                                            |
|--------------|-----------|-----------------|----------------------|-----------|--------------------------|-------|----------------|---|------------------------------------------------------------------------------------------------------------------------------------------------------------------------------------------------------------------------------------------------------------------------------------------------------------------------------------------------------------------------------------------------------------------------------------------------------------------------------------------------|----------------------------------------------------------------------------------------------------------------------------|
|              |           |                 | <i>NOD2</i>          | c.1622G>A | p.Arg54<br>1Gln          | T/B/N | AD;Mu/Het<br>t | 3 |                                                                                                                                                                                                                                                                                                                                                                                                                                                                                                |                                                                                                                            |
| 26           | M         | 3               | <i>SH2DIA</i>        | c.163C>T  | p.Arg55<br>Xaa           | ././A | XLR/Het        | 5 | <p><b>Clinical features:</b> Seizures, acute lethargy, incoherent speech, aphasia, neutropaenia. Chronic relapsing disease course.</p> <p><b>Investigations:</b> MRI brain showed widespread bilateral white matter disease progressive over time with brain volume loss. Brain biopsy showed non-specific lymphocytic infiltrate. Negative autoantibody profile and no acute phase response. Negative CSF OGB</p> <p><b>Treatment:</b> IVIG, steroids, cyclophosphamide. plasma exchange.</p> | X-linked lymphoproliferative disease. Underwent allogeneic HSCT. Sibling diagnosed with XLP-type 1 and underwent HSCT too. |
|              |           |                 | <i>RANBP2</i>        | c.6362A>G | p.Gln21<br>21Arg         | T/D/D | AD/Het         | 3 |                                                                                                                                                                                                                                                                                                                                                                                                                                                                                                |                                                                                                                            |
|              |           |                 | <i>RANBP2</i>        | c.7172C>G | p.Thr23<br>91Ser         | T/B/N | AD/Het         | 3 |                                                                                                                                                                                                                                                                                                                                                                                                                                                                                                |                                                                                                                            |
|              |           |                 | <i>C6</i>            | c.542C>T  | p.Thr18<br>1Ile          | T/B/N | -/Het          | 3 |                                                                                                                                                                                                                                                                                                                                                                                                                                                                                                |                                                                                                                            |
|              |           |                 | <i>NOTCH1</i>        | c.3664G>A | p.Val12<br>22Met         | T/B/D | AD/Het         | 3 |                                                                                                                                                                                                                                                                                                                                                                                                                                                                                                |                                                                                                                            |
|              |           |                 | <i>POLR3A</i>        | c.1745G>T | p.Arg58<br>2Leu          | D/B/D | AR/Het         | 3 |                                                                                                                                                                                                                                                                                                                                                                                                                                                                                                |                                                                                                                            |
|              |           |                 | <i>DNASE1</i>        | c.105G>C  | p.Glu35<br>Asp           | T/B/D | AD/Het         | 3 |                                                                                                                                                                                                                                                                                                                                                                                                                                                                                                |                                                                                                                            |
|              |           |                 | <i>NLRP12</i>        | c.1855G>C | p.Glu61<br>9Gln          | D/D/D | AD/Het         | 3 |                                                                                                                                                                                                                                                                                                                                                                                                                                                                                                |                                                                                                                            |
|              |           |                 | <i>CBS;CBS<br/>L</i> | c.1105C>T | p.Arg36<br>9Cys          | D/D/D | AR/Het         | 3 |                                                                                                                                                                                                                                                                                                                                                                                                                                                                                                |                                                                                                                            |
| <i>USP18</i> | c.1115G>T | p.Cys37<br>2Phe | D/B/N                | AR/Het    | 3                        |       |                |   |                                                                                                                                                                                                                                                                                                                                                                                                                                                                                                |                                                                                                                            |
| 27           | F         | 17mon<br>ths    | <i>SKI</i>           | c.1163C>T | p.Ala38<br>8Val          | T/B/N | AD/Het         | 3 | <p><b>Clinical features:</b> Necrotising encephalopathy with seizures leading to death preceded by chest infection.</p> <p><b>Investigations:</b> MRI brain showed oedema, no focal lesions. Negative autoantibody profile, cytopaenias, no acute phase response.</p>                                                                                                                                                                                                                          | Unclassified neuroinflammatory disease                                                                                     |
|              |           |                 | <i>RANBP2</i>        | c.7172C>G | p.Thr23<br>91Ser         | T/B/N | AD/Het         | 3 |                                                                                                                                                                                                                                                                                                                                                                                                                                                                                                |                                                                                                                            |
|              |           |                 | <i>BTD</i>           | c.1171C>T | p.Pro39<br>1Ser          | T/B/N | AR/Het         | 3 |                                                                                                                                                                                                                                                                                                                                                                                                                                                                                                |                                                                                                                            |
|              |           |                 | <i>TGFBR2</i>        | c.374del  | p.Lys12<br>8SERfs<br>*34 | ././. | AD/Het         | 3 |                                                                                                                                                                                                                                                                                                                                                                                                                                                                                                |                                                                                                                            |
|              |           |                 | <i>COQ2</i>          | c.64A>T   | p.Arg22<br>Xaa           | ././A | AD;AR/Het<br>t | 3 |                                                                                                                                                                                                                                                                                                                                                                                                                                                                                                |                                                                                                                            |

|    |   |   |                |                 |                    |       |           |   |                                                                                                                                                                                                                                                                                                                                                                                                                                                                                                                                     |                                                                                                                                               |
|----|---|---|----------------|-----------------|--------------------|-------|-----------|---|-------------------------------------------------------------------------------------------------------------------------------------------------------------------------------------------------------------------------------------------------------------------------------------------------------------------------------------------------------------------------------------------------------------------------------------------------------------------------------------------------------------------------------------|-----------------------------------------------------------------------------------------------------------------------------------------------|
|    |   |   | <i>MEFV</i>    | c.1772T>C       | p.Ile591<br>Thr    | T/B/N | AD;AR/Het | 3 | Negative CSF OGB.<br><b>Treatment:</b> corticosteroids and IVIG, plasma exchange with no response.                                                                                                                                                                                                                                                                                                                                                                                                                                  |                                                                                                                                               |
|    |   |   | <i>COX10</i>   | c.1291C>T       | p.Arg43<br>1Trp    | D/P/N | AR;Mi/Het | 3 |                                                                                                                                                                                                                                                                                                                                                                                                                                                                                                                                     |                                                                                                                                               |
|    |   |   | <i>STXBP2</i>  | c.1034C>T       | p.Thr34<br>5Mey    | D/D/D | -/Het     | 4 |                                                                                                                                                                                                                                                                                                                                                                                                                                                                                                                                     |                                                                                                                                               |
|    |   |   | <i>PRF1</i>    | c.272C>T        | p.Ala91<br>Val     | D/D/D | AR/Het    | 3 |                                                                                                                                                                                                                                                                                                                                                                                                                                                                                                                                     |                                                                                                                                               |
|    |   |   | <i>USP18</i>   | c.1097T>C       | p.Val36<br>6Ala    | D/P/N | AR/Het    | 3 |                                                                                                                                                                                                                                                                                                                                                                                                                                                                                                                                     |                                                                                                                                               |
|    |   |   | <i>TRNT1</i>   | c.1057-<br>7C>G | p.introni<br>c     | ././. | AR/Het    | 5 |                                                                                                                                                                                                                                                                                                                                                                                                                                                                                                                                     |                                                                                                                                               |
| 28 | M | 8 | <i>ISG15</i>   | c.388C>T        | p.Pro13<br>0Ser    | T/P/N | AR/Het    | 3 | <b>Clinical features:</b><br>Refractory epilepsy. Mild skin rashes occasional fevers. Chronic relapsing disease course.<br><b>Investigations:</b> Brain MRI showed white matter disease in the left temporal pole, both mesial frontal lobes, left insular, left peritrigonal and parietal regions with diffuse cortical atrophy particularly in the left frontal and perirolandic regions.<br>Brain biopsy showed chronic inflammatory process affecting both white and grey matter with no fibrinoid necrosis of leukocytoclasia. | Muckle Wells syndrome (Cryopyrin associated periodic syndrome). Referred to rheumatology for consideration of starting IL-1 blockade therapy. |
|    |   |   | <i>PEX10</i>   | c.611G>A        | p.Arg20<br>4His    | T/B/N | AR/Het    | 3 |                                                                                                                                                                                                                                                                                                                                                                                                                                                                                                                                     |                                                                                                                                               |
|    |   |   | <i>C8A</i>     | c.1331G>A       | p.Arg44<br>4His    | D/D/D | AR/Het    | 3 |                                                                                                                                                                                                                                                                                                                                                                                                                                                                                                                                     |                                                                                                                                               |
|    |   |   | <i>NLRP3</i>   | c.214G>A        | p.Val72<br>Met     | D/D/N | AD/Het    | 4 |                                                                                                                                                                                                                                                                                                                                                                                                                                                                                                                                     |                                                                                                                                               |
|    |   |   | <i>RANBP2</i>  | c.1258A>G       | p.Thr42<br>0Ala    | T/B/N | AD/Het    | 3 |                                                                                                                                                                                                                                                                                                                                                                                                                                                                                                                                     |                                                                                                                                               |
|    |   |   | <i>ERCC3</i>   | c.847C>T        | p.Arg28<br>3Cys    | D/P/D | AR/Het    | 3 |                                                                                                                                                                                                                                                                                                                                                                                                                                                                                                                                     |                                                                                                                                               |
|    |   |   | <i>CYP27A1</i> | c.491G>C        | p.Arg16<br>4Pro    | D/D/D | AR/Het    | 3 |                                                                                                                                                                                                                                                                                                                                                                                                                                                                                                                                     |                                                                                                                                               |
|    |   |   | <i>GATA2</i>   | c.595G>A        | p.Gly19<br>9Arg    | D/D/D | AD/Het    | 3 |                                                                                                                                                                                                                                                                                                                                                                                                                                                                                                                                     |                                                                                                                                               |
|    |   |   | <i>ITPR3</i>   | c.4364G>A       | p.Arg14<br>55His   | T/D/D | AR/Het    | 3 |                                                                                                                                                                                                                                                                                                                                                                                                                                                                                                                                     |                                                                                                                                               |
|    |   |   | <i>SAMD3</i>   | c.731del        | p.Leu24<br>4Yfs*16 | ././. | -/Het     | 3 |                                                                                                                                                                                                                                                                                                                                                                                                                                                                                                                                     |                                                                                                                                               |
|    |   |   | <i>FAM126A</i> | c.1171G>C       | p.Gly39<br>1Arg    | D/B/D | AR/Het    | 3 |                                                                                                                                                                                                                                                                                                                                                                                                                                                                                                                                     |                                                                                                                                               |

|    |   |    |                |                     |                          |       |           |   |                                                                                                                                                                                                                                                                                                                                                                                                                                                                                                                                                                |             |
|----|---|----|----------------|---------------------|--------------------------|-------|-----------|---|----------------------------------------------------------------------------------------------------------------------------------------------------------------------------------------------------------------------------------------------------------------------------------------------------------------------------------------------------------------------------------------------------------------------------------------------------------------------------------------------------------------------------------------------------------------|-------------|
|    |   |    | <i>ERCC6</i>   | c.4315G>C           | p.Ala14<br>39Pro         | D/D/D | AD;AR/Het | 3 | Positive CSF OGB and elevated neopterin 211 nmol/l (RR< 65 nmol/l). Negative antibodies for Myelin Oligodendrocyte Glycoprotein /Aquaporin 4/ ANA/dsDNA.<br><b>Treatment:</b> Corticosteroids and mycophenolate mofetil.                                                                                                                                                                                                                                                                                                                                       |             |
|    |   |    | <i>STAT2</i>   | c.2478G>T           | p.Gln82<br>6His          | D/B/N | AR/Het    | 3 |                                                                                                                                                                                                                                                                                                                                                                                                                                                                                                                                                                |             |
|    |   |    | <i>PMP22</i>   | c.353C>T            | p.Thr11<br>8Met          | D/D/A | AD;AR/Het | 4 |                                                                                                                                                                                                                                                                                                                                                                                                                                                                                                                                                                |             |
|    |   |    | <i>NOTCH3</i>  | c.1490C>T           | p.Ser49<br>7Leu          | T/B/D | AD/Het    | 3 |                                                                                                                                                                                                                                                                                                                                                                                                                                                                                                                                                                |             |
|    |   |    | <i>SLC2A10</i> | c.1057C>G           | p.Leu35<br>3Val          | T/B/N | AR/Het    | 3 |                                                                                                                                                                                                                                                                                                                                                                                                                                                                                                                                                                |             |
| 29 | M | 15 | <i>NDUFS2</i>  | c.1004A>T           | p.Glu33<br>5Val          | D/P/P | AR/Het    | 3 | <b>Clinical features:</b><br>Recurrent episodes of occipital headache, bilateral arm weakness, visual symptoms, collapse.<br><b>Investigations:</b> MRI brain showed patchy bilateral and asymmetric white matter lesions in the cerebral hemispheres and posterior fossa with some attenuation of the posterior circulation vessels on MRA. Catheter angiography cerebral and visceral normal. No spinal pathology. Brain biopsy showed multiple foci of chronic inflammation comprising predominantly T-lymphocytes, present in the cortex, white matter and | Primary HLH |
|    |   |    | <i>RANBP2</i>  | c.5756G>A           | p.Gly19<br>19Asp         | T/B/B | AD/Het    | 3 |                                                                                                                                                                                                                                                                                                                                                                                                                                                                                                                                                                |             |
|    |   |    | <i>RANBP2</i>  | c.6362A>G           | p.Gln21<br>21Arg         | T/D/D | AD/Het    | 3 |                                                                                                                                                                                                                                                                                                                                                                                                                                                                                                                                                                |             |
|    |   |    | <i>RANBP2</i>  | c.6680A>G           | p.Tyr22<br>27Cys         | D/D/D | AD/Hom    | 3 |                                                                                                                                                                                                                                                                                                                                                                                                                                                                                                                                                                |             |
|    |   |    | <i>RANBP2</i>  | c.7172C>G           | p.Thr23<br>91Ser         | T/B/B | AD/Het    | 3 |                                                                                                                                                                                                                                                                                                                                                                                                                                                                                                                                                                |             |
|    |   |    | <i>RANBP2</i>  | c.7669A>G           | p.Asn25<br>57Asp         | T/B/B | AD/Het    | 3 |                                                                                                                                                                                                                                                                                                                                                                                                                                                                                                                                                                |             |
|    |   |    | <i>TGFBR2</i>  | c.449del            | p.Lys15<br>3Serfs*<br>34 | ././. | AD/Hom    | 3 |                                                                                                                                                                                                                                                                                                                                                                                                                                                                                                                                                                |             |
|    |   |    | <i>FBN2</i>    | c.8351C>T           | p.Pro27<br>84Leu         | T/B/B | AD/Het    | 3 |                                                                                                                                                                                                                                                                                                                                                                                                                                                                                                                                                                |             |
|    |   |    | <i>CSF1R</i>   | c.2891_289<br>2insC | p.Gln96<br>5Alafs*<br>11 | ././. | AD/Hom    | 3 |                                                                                                                                                                                                                                                                                                                                                                                                                                                                                                                                                                |             |
|    |   |    | <i>PEX6</i>    | c.2219T>C           | p.Leu74<br>0Pro          | D/D/D | AD;AR/Het | 3 |                                                                                                                                                                                                                                                                                                                                                                                                                                                                                                                                                                |             |
|    |   |    | <i>PRF1</i>    | c.731T>G            | p.Leu24<br>4Arg          | D/D/D | AR/Het    | 4 |                                                                                                                                                                                                                                                                                                                                                                                                                                                                                                                                                                |             |

|    |   |    |                |                      |                          |       |           |   |                                                                                                                                                                                                                                                                                                                                                                                                                                                                                                                                                                                                             |                                        |
|----|---|----|----------------|----------------------|--------------------------|-------|-----------|---|-------------------------------------------------------------------------------------------------------------------------------------------------------------------------------------------------------------------------------------------------------------------------------------------------------------------------------------------------------------------------------------------------------------------------------------------------------------------------------------------------------------------------------------------------------------------------------------------------------------|----------------------------------------|
|    |   |    | <i>PRF1</i>    | c.694C>T             | p.Arg23<br>2Cys          | D/D/D | AR/Het    | 4 | <p>possibly on leptomeningeal surface in perivascular but no obvious evidence of vasculitis. Occasional foci show features of possible early granulomas, but there is no necrosis. RNA sequencing for identification of any pathogens on brain biopsy tissue was negative. Tuberculosis PCR and extended culture negative. Abnormal perforin expression and NK cell killing activity. CSF OGB negative; raised neopterin 211 (RR &lt; 65 nmol/L). Normal complement studies, negative autoantibodies including MOG/Aq4. Mannose binding lectin deficient.</p> <p><b>Treatment:</b><br/>Corticosteroids.</p> |                                        |
|    |   |    | <i>PSTPIP1</i> | c.79C>T              | p.R27W                   | D/./. | AD/Het    | 3 |                                                                                                                                                                                                                                                                                                                                                                                                                                                                                                                                                                                                             |                                        |
|    |   |    | <i>DNASE1</i>  | c.460C>G             | p.P154<br>A              | D/B/B | AD/Het    | 3 |                                                                                                                                                                                                                                                                                                                                                                                                                                                                                                                                                                                                             |                                        |
|    |   |    | <i>MEFV</i>    | c.442G>C             | p.E148<br>Q              | D/D/P | AD;AR/Het | 3 |                                                                                                                                                                                                                                                                                                                                                                                                                                                                                                                                                                                                             |                                        |
|    |   |    | <i>USP18</i>   | c.974A>G             | p.N325<br>S              | T/B/B | AR/Het    | 3 |                                                                                                                                                                                                                                                                                                                                                                                                                                                                                                                                                                                                             |                                        |
|    |   |    | <i>DARS2</i>   | c.228-<br>21T>C      | p.introni<br>c           | ././. | AR/Hom    | 4 |                                                                                                                                                                                                                                                                                                                                                                                                                                                                                                                                                                                                             |                                        |
|    |   |    | <i>DARS2</i>   | c.228-20_<br>-21insC | p.introni<br>c           | ././. | AR/Het    | 4 |                                                                                                                                                                                                                                                                                                                                                                                                                                                                                                                                                                                                             |                                        |
| 30 | F | 12 | <i>CFHR5</i>   | c.Ala480dup          | p.Glu16<br>3Argfs*<br>34 | ././. | AD/Hom    | 4 | <p><b>Clinical features:</b> Short history of fever and headache followed by rapid deterioration of conscious level and evidence raised ICP. No systemic symptoms or other organ involvement.</p>                                                                                                                                                                                                                                                                                                                                                                                                           | Unclassified neuroinflammatory disease |
|    |   |    | <i>CFHR5</i>   | c.622T>C             | p.Cys20<br>8Arg          | D/D/N | AD/Het    | 3 |                                                                                                                                                                                                                                                                                                                                                                                                                                                                                                                                                                                                             |                                        |
|    |   |    | <i>LYST</i>    | c.8806G>A            | p.Val29<br>36Ile         | T/B/D | AR/Het    | 3 |                                                                                                                                                                                                                                                                                                                                                                                                                                                                                                                                                                                                             |                                        |
|    |   |    | <i>RANBP2</i>  | c.7172C>G            | p.Thr23<br>91Ser         | T/B/N | AD/Het    | 3 |                                                                                                                                                                                                                                                                                                                                                                                                                                                                                                                                                                                                             |                                        |

|    |   |   |                |                 |                         |       |           |   |                                                                                                                                                                                                                                                                                                                                                                 |                                                                                                                       |
|----|---|---|----------------|-----------------|-------------------------|-------|-----------|---|-----------------------------------------------------------------------------------------------------------------------------------------------------------------------------------------------------------------------------------------------------------------------------------------------------------------------------------------------------------------|-----------------------------------------------------------------------------------------------------------------------|
|    |   |   | <i>CFI</i>     | c.1555G>A       | p.Asp51<br>9Asn         | D/D/D | AD;AR/Het | 3 | Bilateral papillitis and/or papilloedema.<br><b>Investigations:</b> MRI brain suggested fulminant presumed ADEM. Biopsy – no vasculitis, monocytic infiltrate, no marked histochemical evidence of demyelination. Negative autoantibody profile and no acute phase response. Negative CSF OGB.<br><b>Treatment:</b> Required EVD and decompressive craniectomy. |                                                                                                                       |
|    |   |   | <i>CFI</i>     | c.1019T>C       | p.Ile340<br>Thr         | D/P/N | AD;AR/Het | 3 |                                                                                                                                                                                                                                                                                                                                                                 |                                                                                                                       |
|    |   |   | <i>PEX7</i>    | c.377A>C        | p.Gln12<br>6Pro         | T/P/D | AR/Het    | 3 |                                                                                                                                                                                                                                                                                                                                                                 |                                                                                                                       |
|    |   |   | <i>GALC</i>    | c.334A>G        | p.Thr11<br>2Ala         | T/D/D | AR/Het    | 4 |                                                                                                                                                                                                                                                                                                                                                                 |                                                                                                                       |
|    |   |   | <i>NDUFAF1</i> | c.958G>A        | p.Glu32<br>0Lys         | T/B/N | AR/Het    | 3 |                                                                                                                                                                                                                                                                                                                                                                 |                                                                                                                       |
|    |   |   | <i>POLG</i>    | c.158_159insGCA | p.Gln55<br>_Pro56insGln | ././. | AD;AR/Hom | 3 |                                                                                                                                                                                                                                                                                                                                                                 |                                                                                                                       |
|    |   |   | <i>C3</i>      | c.4855A>C       | p.Ser16<br>19Arg        | T/P/N | AD;AR/Het | 3 |                                                                                                                                                                                                                                                                                                                                                                 |                                                                                                                       |
|    |   |   | <i>TRIM28</i>  | c.1180G>C       | p.Asp39<br>4His         | D/D/D | AD/Het    | 3 |                                                                                                                                                                                                                                                                                                                                                                 |                                                                                                                       |
|    |   |   | <i>USP18</i>   | c.974A>G        | p.Asn32<br>5Ser         | T/B/N | AR/Het    | 3 |                                                                                                                                                                                                                                                                                                                                                                 |                                                                                                                       |
| 31 | F | 8 | <i>PEX10</i>   | c.435G>A        | p.Met14<br>5Ile         | T/B/N | AR/Het    | 3 | <b>Clinical features:</b> Severe progressive retinal ischaemia and retinal angiopathy.<br><b>Investigations:</b> MRI brain non-specific stable white matter disease. Negative autoantibody profile. No acute phase response.<br><b>Treatment:</b> Nil                                                                                                           | POLG2 related metabolic disorder. Referral to metabolic team and further metabolic test investigation were organised. |
|    |   |   | <i>C8B</i>     | c.1505C>T       | p.Ser50<br>2Phe         | D/D/D | AR/Het    | 3 |                                                                                                                                                                                                                                                                                                                                                                 |                                                                                                                       |
|    |   |   | <i>YYIAP1</i>  | c.1157T>C       | p.Ile386<br>Thr         | D/B/B | AR/Het    | 3 |                                                                                                                                                                                                                                                                                                                                                                 |                                                                                                                       |
|    |   |   | <i>HSD17B4</i> | c.1192T>C       | p.Ser39<br>8Pro         | T/B/D | AR/Het    | 3 |                                                                                                                                                                                                                                                                                                                                                                 |                                                                                                                       |
|    |   |   | <i>PSMB8</i>   | c.220A>T        | p.Thr74<br>Ser          | D/D/D | AR/Het    | 3 |                                                                                                                                                                                                                                                                                                                                                                 |                                                                                                                       |
|    |   |   | <i>SPTAN1</i>  | c.1688T>C       | p.Met56<br>3Thr         | T/B/D | AD/Het    | 3 |                                                                                                                                                                                                                                                                                                                                                                 |                                                                                                                       |
|    |   |   | <i>SLC29A3</i> | c.7G>A          | p.Val3Ile               | T/B/N | AR/Het    | 3 |                                                                                                                                                                                                                                                                                                                                                                 |                                                                                                                       |

|    |   |    |                 |                 |                         |       |           |   |                                                                                                                                                                                                                                                                                                                                        |                                                                                                                                             |
|----|---|----|-----------------|-----------------|-------------------------|-------|-----------|---|----------------------------------------------------------------------------------------------------------------------------------------------------------------------------------------------------------------------------------------------------------------------------------------------------------------------------------------|---------------------------------------------------------------------------------------------------------------------------------------------|
|    |   |    | <i>PEX16</i>    | c.760G>C        | p.Val25<br>4Leu         | T/B/N | AR/Het    | 3 |                                                                                                                                                                                                                                                                                                                                        |                                                                                                                                             |
|    |   |    | <i>POLG2</i>    | c.1105A>G       | p.Arg36<br>9Gly         | D/D/D | AD/Hom    | 4 |                                                                                                                                                                                                                                                                                                                                        |                                                                                                                                             |
|    |   |    | <i>NLRP12</i>   | c.2222A>G       | p.Asn74<br>1Ser         | T/B/N | AD/Het    | 3 |                                                                                                                                                                                                                                                                                                                                        |                                                                                                                                             |
|    |   |    | <i>MEFV</i>     | c.442G>C        | p.Glu14<br>8Gln         | D/D/P | AD;AR/Het | 3 |                                                                                                                                                                                                                                                                                                                                        |                                                                                                                                             |
|    |   |    | <i>USP18</i>    | c.974A>G        | p.Asn32<br>5Ser         | T/B/N | AR/Het    | 3 |                                                                                                                                                                                                                                                                                                                                        |                                                                                                                                             |
| 32 | F | 10 | <i>C8A</i>      | c.1454G>A       | p.Arg48<br>5His         | D/B/P | AR/Het    | 3 | <p><b>Clinical features:</b><br/>Recurrent fevers with acute phase response, arthralgia, aseptic meningitis.</p> <p><b>Investigations:</b> MRI brain showed non progressive white matter disease. Negative autoantibody profile and no systemic symptoms or other organ involvement.</p> <p><b>Treatment:</b><br/>corticosteroids.</p> | <p>Autoinflammation, antibody deficiency, and immune dysregulation syndrome (APLAID). Family screening, consideration of IL-1 blockade.</p> |
|    |   |    | <i>CLCN2</i>    | c.704G>A        | p.Arg23<br>5Gln         | D/D/D | AD;AR/Het | 3 |                                                                                                                                                                                                                                                                                                                                        |                                                                                                                                             |
|    |   |    | <i>PEX7</i>     | c.377A>C        | p.Gln12<br>6Pro         | T/P/D | AR/Het    | 3 |                                                                                                                                                                                                                                                                                                                                        |                                                                                                                                             |
|    |   |    | <i>MPLKIP</i>   | c.253G>C        | p.Gln85<br>Arg          | D/B/N | AR/Het    | 3 |                                                                                                                                                                                                                                                                                                                                        |                                                                                                                                             |
|    |   |    | <i>ELN</i>      | c.1861G>A       | p.Ala62<br>1Thr         | D/B/N | AD/Het    | 3 |                                                                                                                                                                                                                                                                                                                                        |                                                                                                                                             |
|    |   |    | <i>TNFRSF1A</i> | c.1343C>T       | p.Prp44<br>8Leu         | T/B/N | AD/Het    | 3 |                                                                                                                                                                                                                                                                                                                                        |                                                                                                                                             |
|    |   |    | <i>STAT2</i>    | c.2473G>T       | p.Gly82<br>5Cys         | T/B/N | AR/Het    | 3 |                                                                                                                                                                                                                                                                                                                                        |                                                                                                                                             |
|    |   |    | <i>POLG</i>     | c.158_159insGCA | p.Gln55<br>_Pro56insGln | ././  | AD;AR/Het | 3 |                                                                                                                                                                                                                                                                                                                                        |                                                                                                                                             |
|    |   |    | <i>POLG</i>     | c.156_158del    | p.Gln55<br>del          | ././  | AD;AR/Het | 3 |                                                                                                                                                                                                                                                                                                                                        |                                                                                                                                             |
|    |   |    | <i>POLG</i>     | c.125G>A        | p.Arg42<br>Gln          | T/B/N | AD;AR/Het | 3 |                                                                                                                                                                                                                                                                                                                                        |                                                                                                                                             |
|    |   |    | <i>PLCG2</i>    | c.1444T>C       | p.Tyr48<br>2His         | T/B/D | AD/Het    | 4 |                                                                                                                                                                                                                                                                                                                                        |                                                                                                                                             |



|                |          |             |                   |           |                  |       |           |   |                                                                                                                                                                                                                                                                                                                                                                                                                                                                                                                                                   |                            |
|----------------|----------|-------------|-------------------|-----------|------------------|-------|-----------|---|---------------------------------------------------------------------------------------------------------------------------------------------------------------------------------------------------------------------------------------------------------------------------------------------------------------------------------------------------------------------------------------------------------------------------------------------------------------------------------------------------------------------------------------------------|----------------------------|
|                |          |             | <i>PLCG2</i>      | c.1712A>G | p.Asn571Ser      | D/B/D | AD/Het    | 4 |                                                                                                                                                                                                                                                                                                                                                                                                                                                                                                                                                   |                            |
|                |          |             | <i>CBS; CBS L</i> | c.833T>C  | p.Ile278Thr      | D/D/A | AR/Het    | 4 |                                                                                                                                                                                                                                                                                                                                                                                                                                                                                                                                                   |                            |
|                |          |             | <i>PEX26</i>      | c.728C>T  | p.Ala243Val      | T/B/N | AR/Het    | 3 |                                                                                                                                                                                                                                                                                                                                                                                                                                                                                                                                                   |                            |
|                |          |             | <i>USP18</i>      | c.1097T>C | p.Val366Ala      | D/D/N | AR/Het    | 3 |                                                                                                                                                                                                                                                                                                                                                                                                                                                                                                                                                   |                            |
|                |          |             | <i>USP18</i>      | c.1115G>T | p.Cys372Phe      | D/B/N | AR/Het    | 3 |                                                                                                                                                                                                                                                                                                                                                                                                                                                                                                                                                   |                            |
| 33             | M        | 9           | <i>C8A</i>        | c.1724C>T | p.P575L          | T/B/P | AR/Het    | 3 | <p><b>Clinical features:</b> Left sided squint and vision loss. Left sided hemiplegia. No systemic symptoms or other organ involvement.</p> <p><b>Investigations:</b> MRI brain showed bilateral symmetrical cortical and subcortical lesions in the parieto occipital lesions affecting both grey and white matter disease with associated oedema and haemorrhagic transformation. Brain biopsy suggested chronic inflammatory disorder with perivascular component. Negative CSF OGB. Negative autoantibody profile. Primary HLH functional</p> | Folate receptor deficiency |
|                |          |             | <i>NDUFS2</i>     | c.58C>A   | p.P20T           | D/B/P | AR/Het    | 3 |                                                                                                                                                                                                                                                                                                                                                                                                                                                                                                                                                   |                            |
|                |          |             | <i>LYST</i>       | c.8368A>C | p.K2790Q         | D/B/P | AR/Het    | 4 |                                                                                                                                                                                                                                                                                                                                                                                                                                                                                                                                                   |                            |
|                |          |             | <i>RANBP2</i>     | c.8842A>C | p.S2948R         | T/P/N | AD/Het    | 3 |                                                                                                                                                                                                                                                                                                                                                                                                                                                                                                                                                   |                            |
|                |          |             | <i>TGFBR2</i>     | c.374del  | p.Lys128Serfs*34 | ./.   | AD/Hom    | 3 |                                                                                                                                                                                                                                                                                                                                                                                                                                                                                                                                                   |                            |
|                |          |             | <i>CFI</i>        | c.1217G>A | p.Arg406His      | T/P/P | AD;AR/Het | 3 |                                                                                                                                                                                                                                                                                                                                                                                                                                                                                                                                                   |                            |
|                |          |             | <i>OTULIN</i>     | c.439C>T  | p.Pro147Ser      | T/B/N | AR/Het    | 3 |                                                                                                                                                                                                                                                                                                                                                                                                                                                                                                                                                   |                            |
|                |          |             | <i>FBN2</i>       | c.2260G>A | p.Gly754Ser      | T/P/D | AD/Het    | 3 |                                                                                                                                                                                                                                                                                                                                                                                                                                                                                                                                                   |                            |
|                |          |             | <i>TGFBI</i>      | c.805C>T  | p.Leu269Phe      | D/D/D | AD/Het    | 3 |                                                                                                                                                                                                                                                                                                                                                                                                                                                                                                                                                   |                            |
|                |          |             | <i>PHYH</i>       | c.85C>T   | p.Pro29Ser       | T/B/P | AR/Het    | 3 |                                                                                                                                                                                                                                                                                                                                                                                                                                                                                                                                                   |                            |
|                |          |             | <i>GALC</i>       | c.49G>A   | p.Ala17Thr       | T./P  | AR/Het    | 3 |                                                                                                                                                                                                                                                                                                                                                                                                                                                                                                                                                   |                            |
| <i>NDUFAF1</i> | c.941C>G | p.Ala314Gly | D/P/P             | AR/Het    | 3                |       |           |   |                                                                                                                                                                                                                                                                                                                                                                                                                                                                                                                                                   |                            |

|    |   |    |               |                 |                     |       |           |   |                                                                                                                                                                                                                                                                                     |                                        |
|----|---|----|---------------|-----------------|---------------------|-------|-----------|---|-------------------------------------------------------------------------------------------------------------------------------------------------------------------------------------------------------------------------------------------------------------------------------------|----------------------------------------|
|    |   |    | <i>POLG</i>   | c.158_159insGCA | p.Gln55_Pro56insGln | ./.   | AD;AR/Hom | 3 | assays normal.<br><b>Treatment:</b> corticosteroids and cyclophosphamide, mycophenolate mofetil.                                                                                                                                                                                    |                                        |
|    |   |    | <i>TRAP1</i>  | c.2053G>A       | p.Asp685Asn         | T/D/D | -/Het     | 3 |                                                                                                                                                                                                                                                                                     |                                        |
|    |   |    | <i>GFAP</i>   | c.883G>A        | p.Asp295Asn         | D/D/P | AD/Het    | 3 |                                                                                                                                                                                                                                                                                     |                                        |
|    |   |    | <i>MEFV</i>   | c.442G>C        | p.Glu148Gln         | D/D/P | AD;AR/Het | 3 |                                                                                                                                                                                                                                                                                     |                                        |
|    |   |    | <i>PRX</i>    | c.944G>A        | p.Arg315Gln         | T/B/D | AD;AR/Het | 3 |                                                                                                                                                                                                                                                                                     |                                        |
|    |   |    | <i>MLC1</i>   | c.628G>A        | p.Val210Ile         | T/B/D | AR/Het    | 3 |                                                                                                                                                                                                                                                                                     |                                        |
|    |   |    | <i>FOLR1</i>  | c.493+2T>C      | p.intronic          | ./.   | AR/Hom    | 4 |                                                                                                                                                                                                                                                                                     |                                        |
| 34 | F | 21 | <i>DARS2</i>  | c.1257G>A       | p.Met419Ile         | T/B/N | AR/Het    | 3 | <b>Clinical features:</b> Chorea. No other symptoms or organ involvement.<br><b>Imaging:</b> MRI brain showed progressive white matter disease. Autoantibody screen negative and infections as trigger excluded.<br><b>Treatment:</b> IVIG, corticosteroids, mycophenolate mofetil. | Unclassified neuroinflammatory disease |
|    |   |    | <i>NOTCH1</i> | c.3836G>A       | p.Arg1279His        | T/B/D | AD/Het    | 3 |                                                                                                                                                                                                                                                                                     |                                        |
|    |   |    | <i>EXOSC8</i> | c.815G>C        | p.Ser272Thr         | T/P/D | AR/Het    | 5 |                                                                                                                                                                                                                                                                                     |                                        |
|    |   |    | <i>POLG</i>   | c.156_158del    | p.Gln55del          | ./.   | AD;AR/Hom | 3 |                                                                                                                                                                                                                                                                                     |                                        |
|    |   |    | <i>GFAP</i>   | c.1288C>T       | p.Arg430Cys         | D/P/D | AD/Het    | 3 |                                                                                                                                                                                                                                                                                     |                                        |
|    |   |    | <i>POLG2</i>  | c.562G>C        | p.Gly188Arg         | D/D/D | AD/Het    | 3 |                                                                                                                                                                                                                                                                                     |                                        |
|    |   |    | <i>PRX</i>    | c.1568T>C       | p.Leu523Pro         | T/B/N | AD;AR/Het | 3 |                                                                                                                                                                                                                                                                                     |                                        |
|    |   |    | <i>PRX</i>    | c.1483G>C       | p.Glu495Gln         | T/B/D | AD;AR/Het | 3 |                                                                                                                                                                                                                                                                                     |                                        |
|    |   |    | <i>USP18</i>  | c.974A>G        | p.Asn325Ser         | T/B/N | AR/Het    | 3 |                                                                                                                                                                                                                                                                                     |                                        |

|    |   |   |                 |           |                  |       |           |   |                                                                                                                                                                                                                                                                                                                                                                                               |                                                                                                      |
|----|---|---|-----------------|-----------|------------------|-------|-----------|---|-----------------------------------------------------------------------------------------------------------------------------------------------------------------------------------------------------------------------------------------------------------------------------------------------------------------------------------------------------------------------------------------------|------------------------------------------------------------------------------------------------------|
| 35 | M | 9 | <i>STXBP2</i>   | c.1034C>T | p.Thr34<br>5Met  | D/D/D | AD;AR/het | 4 | <p><b>Clinical features:</b> Enterocolitis, headache, cognitive decline, HLH.</p> <p><b>Investigations:</b> MRI brain showed white matter disease non progressive. Negative autoantibody screen and no acute phase response.</p> <p><b>Treatment:</b> Corticosteroids, IVIG, ciclosporin</p>                                                                                                  | Unclassified neuroinflammatory disease with HLH                                                      |
|    |   |   | <i>MFN2</i>     | c.58C>T   | p.His20<br>Tyr   | T/B/D | AR/Het    | 3 |                                                                                                                                                                                                                                                                                                                                                                                               |                                                                                                      |
|    |   |   | <i>YYIAP1</i>   | c.169C>T  | p.Leu57<br>Phe   | T/D/D | AD/Hom    | 3 |                                                                                                                                                                                                                                                                                                                                                                                               |                                                                                                      |
|    |   |   | <i>RANBP2</i>   | c.7499C>T | p.Thr25<br>00Ile | D/B/N | AR/Het    | 3 |                                                                                                                                                                                                                                                                                                                                                                                               |                                                                                                      |
|    |   |   | <i>SKIV2L</i>   | c.3279G>C | p.Glu10<br>93Asp | D/D/D | AR/Het    | 3 |                                                                                                                                                                                                                                                                                                                                                                                               |                                                                                                      |
|    |   |   | <i>NOTCH1</i>   | c.4129C>T | p.Pro13<br>77Ser | T/B/N | AD/Het    | 3 |                                                                                                                                                                                                                                                                                                                                                                                               |                                                                                                      |
|    |   |   | <i>PLCG2</i>    | c.1712A>G | p.Asn57<br>1Ser  | D/B/D | AD/Het    | 3 |                                                                                                                                                                                                                                                                                                                                                                                               |                                                                                                      |
|    |   |   | <i>CTCI</i>     | c.2162G>C | p.Gly72<br>Ala   | T/B/N | AR/Het    | 3 |                                                                                                                                                                                                                                                                                                                                                                                               |                                                                                                      |
|    |   |   | <i>CTCI</i>     | c.1241G>C | p.Gly41<br>4Ala  | T/D/D | AR/Het    | 3 |                                                                                                                                                                                                                                                                                                                                                                                               |                                                                                                      |
| 36 | M | 1 | <i>RNASEH2B</i> | c.179T>G  | p.Leu60<br>Arg   | D/D/A | AR/Het    | 5 | <p><b>Clinical features:</b> Neonatal meningoencephalitis, recurrent seizures, development delay.</p> <p><b>Investigations:</b> MRI brain showed meningoencephalitis. CSF lymphocytosis and raised neopterin (105 nmol/IRR&lt; 65 nmol/l), bilateral widespread white matter disease, normal XIAP expression, negative screening for congenital infection. Negative autoantibody profile.</p> | Aicardi Goutières syndrome (AGS) type 2. Family screening, consideration of JAK inhibition treatment |
|    |   |   | <i>RNASEH2B</i> | c.529G>A  | p.Ala17<br>7Ter  | T/D/A | AR/Het    | 5 |                                                                                                                                                                                                                                                                                                                                                                                               |                                                                                                      |
|    |   |   | <i>SDHB</i>     | c.487T>C  | p.Ser16<br>3Pro  | T/B/A | AD/Het    | 3 |                                                                                                                                                                                                                                                                                                                                                                                               |                                                                                                      |
|    |   |   | <i>C8B</i>      | c.1625C>T | p.Thr54<br>2Ile  | T/B/N | AR/Het    | 3 |                                                                                                                                                                                                                                                                                                                                                                                               |                                                                                                      |
|    |   |   | <i>NLRC4</i>    | c.1163G>A | p.Arg38<br>8Gln  | T/B/. | AD/Het    | 3 |                                                                                                                                                                                                                                                                                                                                                                                               |                                                                                                      |
|    |   |   | <i>RANBP2</i>   | c.5941T>A | p.Ser19<br>81Thr | T/B/N | AD/Het    | 3 |                                                                                                                                                                                                                                                                                                                                                                                               |                                                                                                      |
|    |   |   | <i>CFI</i>      | c.1322A>G | p.Lys44<br>1Arg  | T/B/N | AD;AR/Het | 3 |                                                                                                                                                                                                                                                                                                                                                                                               |                                                                                                      |
|    |   |   | <i>ITPR3</i>    | c.626A>G  | p.Glu20<br>9Gly  | D/D/D | AR/Het    | 3 |                                                                                                                                                                                                                                                                                                                                                                                               |                                                                                                      |

|    |   |    |               |                    |                        |       |           |   |                                                                                                                                                                                                                                                                                                                                       |                                        |
|----|---|----|---------------|--------------------|------------------------|-------|-----------|---|---------------------------------------------------------------------------------------------------------------------------------------------------------------------------------------------------------------------------------------------------------------------------------------------------------------------------------------|----------------------------------------|
|    |   |    | <i>PEX16</i>  | c.760G>C           | p.Val254Leu            | T/B/N | AR/Het    | 3 | Abnormal liver function tests.<br><b>Treatment:</b> Corticosteroids                                                                                                                                                                                                                                                                   |                                        |
|    |   |    | <i>POLG</i>   | c.158_159insGCAGCA | p.Gln55_Pro56insGlnGln | ./.   | AD;AR/Hom | 3 |                                                                                                                                                                                                                                                                                                                                       |                                        |
|    |   |    | <i>POLG</i>   | c.125G>A           | p.Arg42Gln             | T/B/N | AD;AR/Het | 3 |                                                                                                                                                                                                                                                                                                                                       |                                        |
|    |   |    | <i>DNASE1</i> | c.503C>T           | p.Ala168Val            | D/P/D | AD/Het    | 3 |                                                                                                                                                                                                                                                                                                                                       |                                        |
|    |   |    | <i>PRX</i>    | c.4077_4079del     | p.Glu1361del           | ./.   | AD;AR/Het | 3 |                                                                                                                                                                                                                                                                                                                                       |                                        |
|    |   |    | <i>XIAP</i>   | c.1429G>A          | p.Ala477Thr            | D/D/D | XLR/Hemi  | 3 |                                                                                                                                                                                                                                                                                                                                       |                                        |
| 37 | F | 10 | <i>SCN9A</i>  | c.2215A>G          | p.Ile739Val            | D/P/D | AD;AR/Het | 4 | <b>Clinical features:</b> Opsoclonus myoclonus and neuroblastoma in infancy, lupus like disease with recurrent arthritis, cutaneous lesions, malar rash.<br><b>Investigations:</b> MRI brain widespread white matter disease. Positive ANA and dsDNA, Aq4 antibodies.<br><b>Treatment:</b> corticosteroids and mycophenolate mofetil. | Unclassified neuroinflammatory disease |
|    |   |    | <i>CFHR5</i>  | c.136C>T           | p.Pro46Ser             | T/B/N | AD/Het    | 3 |                                                                                                                                                                                                                                                                                                                                       |                                        |
|    |   |    | <i>SCN9A</i>  | c.3734A>G          | p.Asn1245Ser           | D/D/D | AD;AR/Het | 3 |                                                                                                                                                                                                                                                                                                                                       |                                        |
|    |   |    | <i>DDX58</i>  | c.212G>A           | p.Arg71His             | D/D/D | AD/Het    | 3 |                                                                                                                                                                                                                                                                                                                                       |                                        |
|    |   |    | <i>STAT2</i>  | c.685G>A           | p.Glu229Lys            | T/D/D | AR/Het    | 3 |                                                                                                                                                                                                                                                                                                                                       |                                        |
|    |   |    | <i>ATP7B</i>  | c.751C>T           | p.His251Tyr            | T/B/N | AR/Het    | 3 |                                                                                                                                                                                                                                                                                                                                       |                                        |
|    |   |    | <i>TRAP1</i>  | c.1073A>G          | p.Glu358Gly            | T/B/N | -/Het     | 3 |                                                                                                                                                                                                                                                                                                                                       |                                        |
|    |   |    | <i>GFAP</i>   | c.1288C>T          | p.Arg430Cys            | D/P/D | AD/Het    | 3 |                                                                                                                                                                                                                                                                                                                                       |                                        |
|    |   |    | <i>RNF213</i> | c.6551A>G          | p.Gln2184Arg           | T/B/N | -/Het     | 3 |                                                                                                                                                                                                                                                                                                                                       |                                        |
|    |   |    | <i>LPIN2</i>  | c.1801G>A          | p.Glu601Lys            | T/B/D | -/Het     | 3 |                                                                                                                                                                                                                                                                                                                                       |                                        |

|               |                |                  |                |                  |                          |       |               |   |                                                                                                                                                                                                                                                             |                                        |
|---------------|----------------|------------------|----------------|------------------|--------------------------|-------|---------------|---|-------------------------------------------------------------------------------------------------------------------------------------------------------------------------------------------------------------------------------------------------------------|----------------------------------------|
|               |                |                  | <i>PRX</i>     | c.716C>T         | p.Pro23<br>9Leu          | T/P/D | AD;AR/<br>Het | 3 |                                                                                                                                                                                                                                                             |                                        |
|               |                |                  | <i>NEFL</i>    | c.1414-<br>1C>T  | p.introni<br>c           | ././. | -/Hom         | 3 |                                                                                                                                                                                                                                                             |                                        |
| 38            | M              | 17               | <i>PLOD1</i>   | c.1217C>T        | p.Pro40<br>6Leu          | D/D/D | AR/Het        | 3 | <b>Clinical features:</b> Lupus like disease with skin rashes and arthralgia.<br><b>Investigations:</b> MRI brain showed progressive white matter disease, intracerebral calcification.<br>Positive dsDNA antibodies.<br><b>Treatment:</b> corticosteroids. | Unclassified neuroinflammatory disease |
|               |                |                  | <i>RANBP2</i>  | c.5941T>A        | p.Ser19<br>81Thr         | T/B/N | AD/Het        | 3 |                                                                                                                                                                                                                                                             |                                        |
|               |                |                  | <i>ERCC3</i>   | c.144G>C         | p.Glu48<br>Asp           | T/B/D | AR/Het        | 3 |                                                                                                                                                                                                                                                             |                                        |
|               |                |                  | <i>COQ2</i>    | c.64A>T          | p.Arg22<br>Xaa           | ././A | AD;AR/<br>Het | 3 |                                                                                                                                                                                                                                                             |                                        |
|               |                |                  | <i>CSF1R</i>   | c.1237G>A        | p.Gly41<br>3Ser          | T/P/N | AD/Het        | 3 |                                                                                                                                                                                                                                                             |                                        |
|               |                |                  | <i>HFE</i>     | c.193A>T         | p.Ser65<br>Cys           | D/D/A | AR/Het        | 4 |                                                                                                                                                                                                                                                             |                                        |
|               |                |                  | <i>SLC17A5</i> | c.1375G>A        | p.Val45<br>9Met          | D/D/D | AR/Het        | 3 |                                                                                                                                                                                                                                                             |                                        |
|               |                |                  | <i>PEX1</i>    | c.2953C>T        | c.Gky12<br>20Thr         | D/D/D | AR/Het        | 3 |                                                                                                                                                                                                                                                             |                                        |
|               |                |                  | <i>SUCLA2</i>  | c.1220G>T        | p.Arg40<br>7Leu          | D/D/D | AR/Het        | 3 |                                                                                                                                                                                                                                                             |                                        |
|               |                |                  | <i>POLG</i>    | c.2492A>G        | p.Tyr83<br>1Cys          | T/D/A | AD;AR/<br>Het | 3 |                                                                                                                                                                                                                                                             |                                        |
|               |                |                  | <i>POLG</i>    | c.158_166d<br>el | p.Gln53<br>_Gln55d<br>el | ././. | AD;AR/<br>Het | 3 |                                                                                                                                                                                                                                                             |                                        |
|               |                |                  | <i>NOD2</i>    | c.2722G>C        | p.Gly90<br>8Arg          | D/D/D | AR;Mu/<br>Het | 3 |                                                                                                                                                                                                                                                             |                                        |
| <i>POLG2</i>  | c.1247G>C      | p.Gly41<br>6Ala  | T/D/D          | AD/Het           | 3                        |       |               |   |                                                                                                                                                                                                                                                             |                                        |
| <i>RNF213</i> | c.11465G><br>T | p.Arg38<br>22Ile | D/D/D          | -/Het            | 3                        |       |               |   |                                                                                                                                                                                                                                                             |                                        |

|              |           |                  |                 |              |                      |       |           |   |                                                                                                                                                                                                                                                                                                                                                                                  |                                        |
|--------------|-----------|------------------|-----------------|--------------|----------------------|-------|-----------|---|----------------------------------------------------------------------------------------------------------------------------------------------------------------------------------------------------------------------------------------------------------------------------------------------------------------------------------------------------------------------------------|----------------------------------------|
|              |           |                  | <i>RNASEH2A</i> | c.615T>A     | p.Asp20<br>5Glu      | T/B/D | AR/Het    | 3 |                                                                                                                                                                                                                                                                                                                                                                                  |                                        |
| 39           | F         | 8                | <i>TRNT1</i>    | c.667A>G     | p.Ile223<br>Val      | T/P/D | AR/Het    | 5 | <b>Clinical features:</b> Right sided hemiplegia, blurred vision, pyrexia, cytopaenias, seizures. No systemic symptoms or other organ involvement. Chronic progressive disease course.<br><b>Investigations:</b> CT diffuse cerebral oedema and swelling, MRI brain white matter disease. Negative autoantibody profile. Negative CSF OGB.<br><b>Treatment:</b> corticosteroids. | Unclassified neuroinflammatory disease |
|              |           |                  | <i>RANBP2</i>   | c.2351G>A    | p.Arg78<br>4Lys      | T/B/N | AD/Het    | 3 |                                                                                                                                                                                                                                                                                                                                                                                  |                                        |
|              |           |                  | <i>NDUFS1</i>   | c.29T>C      | p.Leu10<br>Pro       | D/B/N | AR/Het    | 3 |                                                                                                                                                                                                                                                                                                                                                                                  |                                        |
|              |           |                  | <i>CYP27A1</i>  | c.673C>T     | p.Arg22<br>5Cys      | D/D/D | AR/Het    | 3 |                                                                                                                                                                                                                                                                                                                                                                                  |                                        |
|              |           |                  | <i>MYLK</i>     | c.2101G>A    | p.Ala70<br>1Thr      | T/B/N | AD/Het    | 3 |                                                                                                                                                                                                                                                                                                                                                                                  |                                        |
|              |           |                  | <i>MYLK</i>     | c.1684G>A    | p.Glu56<br>2Lys      | D/P/D | AD/Het    | 3 |                                                                                                                                                                                                                                                                                                                                                                                  |                                        |
|              |           |                  | <i>TTC37</i>    | c.860A>G     | p.Lys28<br>7Arg      | T/B/D | AR/Het    | 3 |                                                                                                                                                                                                                                                                                                                                                                                  |                                        |
|              |           |                  | <i>FAM126A</i>  | c.1555T>C    | p.Ser51<br>9Pro      | D/P/D | AR/Het    | 3 |                                                                                                                                                                                                                                                                                                                                                                                  |                                        |
|              |           |                  | <i>NOTCH1</i>   | c.4451A>G    | p.Asn14<br>84Ser     | T/B/D | AD/Het    | 3 |                                                                                                                                                                                                                                                                                                                                                                                  |                                        |
|              |           |                  | <i>MYO5A</i>    | c.5018C>T    | p.Ser16<br>73Leu     | D/P/D | AR/Het    | 3 |                                                                                                                                                                                                                                                                                                                                                                                  |                                        |
|              |           |                  | <i>PSTPIP1</i>  | c.80G>A      | p.Arg27<br>Gln       | D/.N  | AD/Het    | 3 |                                                                                                                                                                                                                                                                                                                                                                                  |                                        |
|              |           |                  | <i>POLG</i>     | c.803G>C     | p.Gly26<br>8Ala      | D/D/D | AD;AR/Het | 3 |                                                                                                                                                                                                                                                                                                                                                                                  |                                        |
|              |           |                  | <i>POLG</i>     | c.153_158del | p.Gln54<br>_Gln55del | ./.   | AD;AR/Het | 3 |                                                                                                                                                                                                                                                                                                                                                                                  |                                        |
| <i>PARN</i>  | c.1102A>T | p.Ser36<br>8Cys  | D/P/D           | AD;AR/Het    | 3                    |       |           |   |                                                                                                                                                                                                                                                                                                                                                                                  |                                        |
| <i>MYH11</i> | c.5819C>A | p.Pro19<br>40Gln | D/B/D           | AD/Het       | 3                    |       |           |   |                                                                                                                                                                                                                                                                                                                                                                                  |                                        |

|    |   |   |               |             |              |       |           |   |                                                                                                                                                                                                                                                                                                                                                                                                                                                 |                                                                            |
|----|---|---|---------------|-------------|--------------|-------|-----------|---|-------------------------------------------------------------------------------------------------------------------------------------------------------------------------------------------------------------------------------------------------------------------------------------------------------------------------------------------------------------------------------------------------------------------------------------------------|----------------------------------------------------------------------------|
|    |   |   | <i>NOD2</i>   | c.781G>T    | p.Ala261Ser  | T/B/N | AD;Mu/Het | 3 |                                                                                                                                                                                                                                                                                                                                                                                                                                                 |                                                                            |
|    |   |   | <i>RNF213</i> | c.103G>A    | p.Glu35Lys   | T/B/N | -/Het     | 3 |                                                                                                                                                                                                                                                                                                                                                                                                                                                 |                                                                            |
|    |   |   | <i>RNF213</i> | c.7417G>A   | p.Ala2473Thr | T/B/N | -/Het     | 3 |                                                                                                                                                                                                                                                                                                                                                                                                                                                 |                                                                            |
|    |   |   | <i>DNASE2</i> | c.611A>G    | p.His204Arg  | T/B/N | -/Het     | 3 |                                                                                                                                                                                                                                                                                                                                                                                                                                                 |                                                                            |
|    |   |   | <i>CST3</i>   | c.88G>A     | p.Gly30Ser   | T/B/N | AD/Het    | 3 |                                                                                                                                                                                                                                                                                                                                                                                                                                                 |                                                                            |
|    |   |   | <i>PEX26</i>  | c.130C>T    | p.Leu44Phe   | T/B/N | AR/Het    | 3 |                                                                                                                                                                                                                                                                                                                                                                                                                                                 |                                                                            |
|    |   |   | <i>USP18</i>  | c.389G>A    | p.Cys130Tyr  | T/B/N | AR/Het    | 3 |                                                                                                                                                                                                                                                                                                                                                                                                                                                 |                                                                            |
|    |   |   | <i>NEFL</i>   | 4345+2C>T   | p.Intronic   | ./.   | AD;AR/Hom | 3 |                                                                                                                                                                                                                                                                                                                                                                                                                                                 |                                                                            |
| 40 | M | 6 | <i>STXBP2</i> | c.1621G>A   | p.Gly541Ser  | D/D/D | AR/Het    | 5 | <p><b>Clinical features:</b> Progressive ataxia, headaches, encephalopathy. No systemic symptoms or other organ involvement.</p> <p><b>Investigations:</b> MRI brain showed progressive cerebellar white matter disease and dentate changes associated with cerebellar swelling and crowding of posterior fossa. Elevated CSF neopterin 95 (RR&lt;65), negative CSF OGB, normal ESR and CRP. Negative autoantibody profile. Abnormal T-cell</p> | <p>Primary HLH. Referred to immunology and undergoing work up for HSCT</p> |
|    |   |   | <i>STXBP2</i> | c.1247-1G>C | p.Intronic   | ././D | AR/Het    | 5 |                                                                                                                                                                                                                                                                                                                                                                                                                                                 |                                                                            |
|    |   |   | <i>PLOD1</i>  | c.555G>T    | p.Lys185Asn  | T/B/D | AR/Het    | 3 |                                                                                                                                                                                                                                                                                                                                                                                                                                                 |                                                                            |
|    |   |   | <i>PEX11B</i> | c.13G>A     | p.Val5Ile    | ./.   | AR/Het    | 3 |                                                                                                                                                                                                                                                                                                                                                                                                                                                 |                                                                            |
|    |   |   | <i>COQ8A</i>  | c.11T>A     | p.Ile4Lys    | T/D/D | AR/Het    | 3 |                                                                                                                                                                                                                                                                                                                                                                                                                                                 |                                                                            |
|    |   |   | <i>LYST</i>   | c.3499G>A   | p.Val1167Ile | T/B/N | AR/Het    | 3 |                                                                                                                                                                                                                                                                                                                                                                                                                                                 |                                                                            |
|    |   |   | <i>RANBP2</i> | c.5941T>A   | p.Ser1981Thr | T/B/N | AD/Het    | 3 |                                                                                                                                                                                                                                                                                                                                                                                                                                                 |                                                                            |
|    |   |   | <i>IFIH1</i>  | c.2863C>G   | p.Gln955Glu  | T/B/N | AD/Het    | 3 |                                                                                                                                                                                                                                                                                                                                                                                                                                                 |                                                                            |
|    |   |   | <i>CSF1R</i>  | c.533G>C    | p.Ser178Thr  | T/B/N | AD/Het    | 3 |                                                                                                                                                                                                                                                                                                                                                                                                                                                 |                                                                            |

|    |   |    |                |                 |                         |       |           |   |                                                                                                                                                                                                                                                                                                                                                                                                                         |                                                                                             |
|----|---|----|----------------|-----------------|-------------------------|-------|-----------|---|-------------------------------------------------------------------------------------------------------------------------------------------------------------------------------------------------------------------------------------------------------------------------------------------------------------------------------------------------------------------------------------------------------------------------|---------------------------------------------------------------------------------------------|
|    |   |    | <i>COL4A1</i>  | c.C161C>T       | p.Pro54<br>Leu          | D/D/D | AD/Het    | 3 | and NK cell degranulation assay.                                                                                                                                                                                                                                                                                                                                                                                        |                                                                                             |
|    |   |    | <i>SAMHD1</i>  | c.G1583G>A      | p.Arg52<br>8Lys         | T/B/N | AD;AR/Het | 3 | <b>Treatment:</b> mycophenolate mofetil, corticosteroids                                                                                                                                                                                                                                                                                                                                                                |                                                                                             |
| 41 | F | 7  | <i>IFIH1</i>   | c.2336G>A       | p.Arg77<br>9His         | T/D/D | AD/Het    | 5 | <b>Clinical features:</b> Severe developmental delay, past medical history of opsoclonus myoclonus and neuroblastoma, lupus like disease characterised by cutaneous vasculitis and a malar rash.<br><b>Investigations:</b> MRI brain showed wide spread white matter disease.<br>Raised inflammatory markers and positive autoantibodies (ANA, anti-dsDNA).<br><b>Treatment:</b> mycophenolate mofetil, corticosteroids | AGS type 7. Started treatment with JAK inhibitor. Family counselling and genetic screening. |
|    |   |    | <i>C2</i>      | c.1109C>T       | p.Ala37<br>0Val         | T/B/N | AR/Het    | 3 |                                                                                                                                                                                                                                                                                                                                                                                                                         |                                                                                             |
|    |   |    | <i>TSC1</i>    | c.2285A>G       | p.Asn76<br>2Ser         | T/B/D | AD/Het    | 3 |                                                                                                                                                                                                                                                                                                                                                                                                                         |                                                                                             |
|    |   |    | <i>POLG</i>    | c.158_159insGCA | p.Gln55<br>_Pro56insGln | ./.   | AD;AR/Het | 3 |                                                                                                                                                                                                                                                                                                                                                                                                                         |                                                                                             |
|    |   |    | <i>CLEC16A</i> | c.2287G>A       | p.Val76<br>3Met         | T/D/D | -/Het     | 3 |                                                                                                                                                                                                                                                                                                                                                                                                                         |                                                                                             |
|    |   |    | <i>ACOX1</i>   | c.628C>T        | p.Arg21<br>0Cys         | D/D/D | AR/Het    | 3 |                                                                                                                                                                                                                                                                                                                                                                                                                         |                                                                                             |
|    |   |    | <i>NEFL</i>    | 4345+2C>T       | p.Intronic              | ./.   | AD;AR/Hom | 3 |                                                                                                                                                                                                                                                                                                                                                                                                                         |                                                                                             |
| 42 | F | 13 | <i>RAB27A</i>  | c.550C>T        | p.Arg18<br>4Xaa         | ././D | AR/Het    | 5 | <b>Clinical features:</b> Strabismus, ataxia. Mild erythematous skin rashes, no fevers or other systemic symptoms.<br><b>Investigations:</b> MRI brain widespread progressive white matter disease in pons medulla and cerebellum.<br>Negative autoantibody profile. No cytopaenias.                                                                                                                                    | Griscelli syndrome. Referred to immunology and undergoing work up for HSCT                  |
|    |   |    | <i>RAB27A</i>  | c.259G>C        | p.Ala87<br>Pro          | D/D/A | AR/Het    | 5 |                                                                                                                                                                                                                                                                                                                                                                                                                         |                                                                                             |
|    |   |    | <i>PEX10</i>   | c.880A>G        | p.Thr29<br>4Ala         | T/D/D | AR/Het    | 3 |                                                                                                                                                                                                                                                                                                                                                                                                                         |                                                                                             |
|    |   |    | <i>DGUOK</i>   | c.125C>T        | p.Ser42<br>Phe          | D/D/D | AR/Het    | 3 |                                                                                                                                                                                                                                                                                                                                                                                                                         |                                                                                             |
|    |   |    | <i>DGUOK</i>   | c.218A>G        | p.Gln73<br>Arg          | D/D/D | AR/Het    | 3 |                                                                                                                                                                                                                                                                                                                                                                                                                         |                                                                                             |
|    |   |    | <i>ITPR3</i>   | c.626A>G        | p.Glu20<br>9Gly         | D/D/D | AR/Het    | 3 |                                                                                                                                                                                                                                                                                                                                                                                                                         |                                                                                             |



|  |  |  |               |           |             |       |        |   |                                                                                                                                   |  |
|--|--|--|---------------|-----------|-------------|-------|--------|---|-----------------------------------------------------------------------------------------------------------------------------------|--|
|  |  |  | <i>SAMD3</i>  | c.149T>C  | p.Ile50Thr  | D/D/D | -/Het  | 3 | Negative CSF OGB.<br>Abnormal T-cell and NK cell degranulation assay.<br><b>Treatment:</b> mycophenolate mofetil, corticosteroids |  |
|  |  |  | <i>UNC13D</i> | c.2243C>T | p.Ala748Val | T/P/D | -/Het  | 3 |                                                                                                                                   |  |
|  |  |  | <i>TRIM28</i> | c.1073A>C | p.N358T     | D/B/D | AD/Het | 3 |                                                                                                                                   |  |

**eTable 7.** Clinical features and class 3 genetic variants identified on Neuroinflammation gene panel (NIP) in 34 patients with suspected genetic neuroinflammatory disorders and unknown molecular diagnoses. MRI=magnetic resonance imaging; GAD=glutamic acid decarboxylase; OGB=oligoclonal bands; JAK=janus kinase; HSCT=haematopoietic stem cell transplantation; HLH=haemophagocytic lymphohistiocytosis; ANA=antinuclear; IVIG=intravenous immunoglobulin; CT=computed tomography; CSF=cerebrospinal fluid; AD=autosomal dominant; AR=autosomal recessive; Mu= mutation; SMu= somatic mutation; XL= X-linked; XLR= X-linked recessive; T=tolerated; B=benign; D=damaging; N=polymorphism; Het= heterozygous; Hom= Homozygous; Hemi= hemizygosity; ESR=erythrocyte sedimentation rate; CRP=C-reactive protein.

| Patient number |  | Sex | Age (Years) | Gene          | Nucleotide Change | Amino Acid Change | Predicted pathogenicity | Mode of inheritance/ Zygosity | Variant Classification | Clinical Features, investigations and treatment                                                                                                                                                                                                                                                                                                                                                                                                  | Clinical impact of NIP and suspected diagnosis after genetic testing |
|----------------|--|-----|-------------|---------------|-------------------|-------------------|-------------------------|-------------------------------|------------------------|--------------------------------------------------------------------------------------------------------------------------------------------------------------------------------------------------------------------------------------------------------------------------------------------------------------------------------------------------------------------------------------------------------------------------------------------------|----------------------------------------------------------------------|
| 43             |  | F   | 19          | <i>C7</i>     | c.289A>G          | p.Ile97Val        | T/D/D                   | -/Het                         | 3                      | <p><b>Clinical features:</b> Chromosome 6p24-26 deletion syndrome, progressive motor difficulties, colobomas, retinal changes, and scoliosis.</p> <p><b>Investigations:</b> Symmetrical white matter disease, ventriculomegaly. Negative autoantibody screen and no systemic symptoms or other organ involvement. No acute phase response. Negative CSG OGB and normal levels of CSF neopterin.</p> <p><b>Treatment:</b> corticosteroids and</p> | Unclassified neuroinflammatory disease                               |
|                |  |     |             | <i>FBN2</i>   | C.362A>G          | p.Asp121Gly       | D/P/D                   | AD/Het                        | 3                      |                                                                                                                                                                                                                                                                                                                                                                                                                                                  |                                                                      |
|                |  |     |             | <i>NOTCH1</i> | c.4823G>A         | p.Arg1608His      | T/D/D                   | AD/Het                        | 3                      |                                                                                                                                                                                                                                                                                                                                                                                                                                                  |                                                                      |
|                |  |     |             | <i>HFE</i>    | c.283G>C          | p. Asp 95His      | D/D/D                   | AD/AR/Het                     | 3                      |                                                                                                                                                                                                                                                                                                                                                                                                                                                  |                                                                      |
|                |  |     |             | <i>NOD2</i>   | c.859C>T          | p.His287Tyr       | T/P/N                   | AD/Het                        | 3                      |                                                                                                                                                                                                                                                                                                                                                                                                                                                  |                                                                      |
|                |  |     |             | <i>NOD2</i>   | c.2046G>T         | p. Leu 682Phe     | D/D/D                   | AD/ Het                       | 3                      |                                                                                                                                                                                                                                                                                                                                                                                                                                                  |                                                                      |
|                |  |     |             | <i>RANBP2</i> | c.6362A>G         | p. Gln2121Arg     | T/D/D                   | AD/Het                        | 3                      |                                                                                                                                                                                                                                                                                                                                                                                                                                                  |                                                                      |
|                |  |     |             | <i>RANBP2</i> | c.7172C>G         | p. Thr2391Ser     | T/B/N                   | AD/Het                        | 3                      |                                                                                                                                                                                                                                                                                                                                                                                                                                                  |                                                                      |
|                |  |     |             | <i>RARS</i>   | c.982G>A          | p. Val 328 Ile    | T/B/N                   | AR/Het                        | 3                      |                                                                                                                                                                                                                                                                                                                                                                                                                                                  |                                                                      |
|                |  |     |             | <i>USP18</i>  | c.974A>G          | p.Asn325Ser       | T/B/N                   | AR/Het                        | 3                      |                                                                                                                                                                                                                                                                                                                                                                                                                                                  |                                                                      |

|               |           |              |       |                |           |              |       |           |   |                                                                                                                                                                                                                                                                                                                                                   |                                        |
|---------------|-----------|--------------|-------|----------------|-----------|--------------|-------|-----------|---|---------------------------------------------------------------------------------------------------------------------------------------------------------------------------------------------------------------------------------------------------------------------------------------------------------------------------------------------------|----------------------------------------|
|               |           |              |       | <i>USP18</i>   | c.1115G>T | p.Cys372 Phe | D/B/N | AR/Het    | 3 | mycophenolate mofetil. Required VP shunt for ventriculomegaly.                                                                                                                                                                                                                                                                                    |                                        |
| 44            |           | F            | 15    | <i>MASP2</i>   | c.881C>T  | p.Thr294 Met | D/B/N | AR/Het    | 3 | <b>Clinical features:</b><br>Ophthalmoplegia, proptosis, retinal artery occlusion. No systemic symptoms or other organ involvement.<br><b>Investigations:</b><br>MRI brain showed widespread leucoencephalopathy. Mitochondrial DNA mutation testing negative. Negative autoantibody screen and no acute phase response.<br><b>Treatment:</b> Nil | Unclassified neuroinflammatory disease |
|               |           |              |       | <i>PLOD1</i>   | c.1534C>T | p.Arg512 Cys | D/D/D | AR/Het    | 3 |                                                                                                                                                                                                                                                                                                                                                   |                                        |
|               |           |              |       | <i>COPA</i>    | c.766G>C  | p.Val256 Leu | T/B/D | AD/Het    | 3 |                                                                                                                                                                                                                                                                                                                                                   |                                        |
|               |           |              |       | <i>PRF1</i>    | c.632C>T  | p.Ala211 Val | T/B/N | AR/Het    | 3 |                                                                                                                                                                                                                                                                                                                                                   |                                        |
|               |           |              |       | <i>PLCG2</i>   | c.2011A>G | p.Ile671Val  | T/B/D | AD/Het    | 3 |                                                                                                                                                                                                                                                                                                                                                   |                                        |
|               |           |              |       | <i>PRX</i>     | c.4376C>T | p.Ala1459Val | D/D/D | AD;AR/Het | 3 |                                                                                                                                                                                                                                                                                                                                                   |                                        |
|               |           |              |       | <i>RANBP2</i>  | c.3253A>C | p.Lys1085Gln | T/D/D | AD/Het    | 3 |                                                                                                                                                                                                                                                                                                                                                   |                                        |
|               |           |              |       | <i>SLC2A10</i> | c.674G>A  | p.Arg225 His | D/D/N | AR/Het    | 3 |                                                                                                                                                                                                                                                                                                                                                   |                                        |
|               |           |              |       | <i>USP18</i>   | c.974A>G  | p.Asn325 Ser | T/B/N | AR/Het    | 3 |                                                                                                                                                                                                                                                                                                                                                   |                                        |
|               |           |              |       | <i>C2</i>      | c.1305T>A | p.His435 Gln | D/D/D | AR/Het    | 3 |                                                                                                                                                                                                                                                                                                                                                   |                                        |
|               |           |              |       | <i>MEFV</i>    | c.442G>C  | p.Glu148 Gln | D/D/P | AD;AR/Het | 3 |                                                                                                                                                                                                                                                                                                                                                   |                                        |
|               |           |              |       | <i>ELN</i>     | c.1492G>A | p.Ala498 Thr | D/D/D | AD/Het    | 3 |                                                                                                                                                                                                                                                                                                                                                   |                                        |
| <i>SPTAN1</i> | c.4525G>A | p.Asp1509Asn | T/B/D | AD/Het         | 3         |              |       |           |   |                                                                                                                                                                                                                                                                                                                                                   |                                        |
| 45            |           | F            | 9     | <i>PEX14</i>   | c.26A>T   | p.Gln9Leu    | D/B/D | AR/Het    | 3 | <b>Clinical features:</b> HLH, febrile seizures, serositis, enteropathy, hypothyroidism                                                                                                                                                                                                                                                           | Likely primary HLH                     |
|               |           |              |       | <i>CIQC</i>    | c.559G>A  | p.Val187Ile  | T/B/N | AR/Het    | 3 |                                                                                                                                                                                                                                                                                                                                                   |                                        |

|  |  |  |                 |                |              |       |               |   |                                                                                                                                                                                                                                                                 |
|--|--|--|-----------------|----------------|--------------|-------|---------------|---|-----------------------------------------------------------------------------------------------------------------------------------------------------------------------------------------------------------------------------------------------------------------|
|  |  |  | <i>ERCC3</i>    | c.1411G>A      | p.Val471Ile  | D/D/D | AR/Het        | 3 | <p><b>Investigations:</b> bilateral symmetrical white matter lesions, extensive infection screening negative, primary HLH functional assays negative.</p> <p><b>Treatment:</b> corticosteroids, anakinra, methotrexate, baricitinib, plasma exchange, IVIG.</p> |
|  |  |  | <i>MYLK</i>     | c.1182_1184del | p.Val395del  | ./.   | AD/Hom        | 3 |                                                                                                                                                                                                                                                                 |
|  |  |  | <i>CLCN2</i>    | c.1859A>T      | p.Glu620Val  | D/B/D | AD;AR/Het     | 3 |                                                                                                                                                                                                                                                                 |
|  |  |  | <i>C6</i>       | c.2800G>A      | p.Ala934Thr  | T/B/N | -/Het         | 3 |                                                                                                                                                                                                                                                                 |
|  |  |  | <i>C6</i>       | c.1848G>A      | p.Met616Ile  | D/B/N | -/Het         | 3 |                                                                                                                                                                                                                                                                 |
|  |  |  | <i>C6</i>       | c.1701G>C      | p.Gln567His  | T/B/N | -/Het         | 3 |                                                                                                                                                                                                                                                                 |
|  |  |  | <i>NDUFS4</i>   | c.373G>T       | p.Val125Phe  | T/P/N | AR;Mi;XLD/Het | 3 |                                                                                                                                                                                                                                                                 |
|  |  |  | <i>CSF1R</i>    | c.733G>A       | p.Ala245Thr  | T/B/N | AD/Het        | 3 |                                                                                                                                                                                                                                                                 |
|  |  |  | <i>PARN</i>     | c.1741G>A      | p.Gly581Arg  | T/B/N | AD;AR/Het     | 3 |                                                                                                                                                                                                                                                                 |
|  |  |  | <i>NOD2</i>     | c.1411C>T      | p.ARG471Cys  | T/B/N | AD;Mi/Het     | 3 |                                                                                                                                                                                                                                                                 |
|  |  |  | <i>CTCI</i>     | c.370T>G       | p.Leu124Val  | T/B/N | AR/Het        | 3 |                                                                                                                                                                                                                                                                 |
|  |  |  | <i>STXBP2</i>   | c.953C>T       | p.Thr318Met  | T/D/D | -/Het         | 3 |                                                                                                                                                                                                                                                                 |
|  |  |  | <i>STXBP2</i>   | c.1375C>T      | p.Arg459Tyr  | D/D/N | -/Het         | 3 |                                                                                                                                                                                                                                                                 |
|  |  |  | <i>NOTCH3</i>   | c.5764G>T      | p.Val1922Leu | T/D/D | AD/Het        | 3 |                                                                                                                                                                                                                                                                 |
|  |  |  | <i>PRX</i>      | c.2101G>A      | p.Val701M    | T/P/N | AD;AR/Het     | 3 |                                                                                                                                                                                                                                                                 |
|  |  |  | <i>CBS;CBSL</i> | c.588G>C       | p.Arg196Ser  | T/B/D | AR/Het        | 3 |                                                                                                                                                                                                                                                                 |
|  |  |  | <i>USP18</i>    | c.974A>G       | p.Asn325Ser  | T/B/N | AR/Het        | 3 |                                                                                                                                                                                                                                                                 |

|    |  |   |          |               |            |              |       |        |   |                                                                                                                                                                                                                                                                                                                                                                                                                                                                                                |                                        |
|----|--|---|----------|---------------|------------|--------------|-------|--------|---|------------------------------------------------------------------------------------------------------------------------------------------------------------------------------------------------------------------------------------------------------------------------------------------------------------------------------------------------------------------------------------------------------------------------------------------------------------------------------------------------|----------------------------------------|
| 46 |  | F | 8 months | <i>PSMB9</i>  | c.517C>T   | p.Arg173 Cys | D/D/D | AR/Het | 3 | <p><b>Clinical features:</b><br/>Seizures, developmental delay, Right sided hemiplegia and lethargy, livedo reticularis. No other systemic symptoms or other organ involvement.</p> <p><b>Investigations:</b><br/>MRI brain showed left sided MCA infarct and widespread white matter disease. Skin biopsy suggested occlusive endotheliopathy. Negative autoantibody screen and no acute phase response.</p> <p><b>Treatment:</b><br/>corticosteroids and aspirin, mycophenolate mofetil.</p> | Unclassified neuroinflammatory disease |
|    |  |   |          | <i>SKIV2L</i> | c.1705G>A  | p.Val569 Met | T/D/D | AR/Het | 3 |                                                                                                                                                                                                                                                                                                                                                                                                                                                                                                |                                        |
|    |  |   |          | <i>RANBP2</i> | c.1258A>G  | p.Thr420 Ala | T/B/N | AD/Het | 3 |                                                                                                                                                                                                                                                                                                                                                                                                                                                                                                |                                        |
|    |  |   |          | <i>PEX6</i>   | c.235G>C   | p.Ala79Pro   | T/B/N | AR/Het | 3 |                                                                                                                                                                                                                                                                                                                                                                                                                                                                                                |                                        |
|    |  |   |          | <i>ISG15</i>  | c.142C>T   | p.His48Tyr   | T/B/N | AR/Het | 3 |                                                                                                                                                                                                                                                                                                                                                                                                                                                                                                |                                        |
|    |  |   |          | <i>RNF213</i> | c.12463A>C | p.Thr4155Pro | T/P/N | AR/Het | 3 |                                                                                                                                                                                                                                                                                                                                                                                                                                                                                                |                                        |
|    |  |   |          | <i>PRF1</i>   | c.272C>T   | p.Ala91 Val  | D/D/D | AR/Het | 3 |                                                                                                                                                                                                                                                                                                                                                                                                                                                                                                |                                        |
|    |  |   |          | <i>USP18</i>  | c.974A>G   | p.Asn325 Ser | T/B/N | AR/Het | 3 |                                                                                                                                                                                                                                                                                                                                                                                                                                                                                                |                                        |
| 47 |  | F | 15       | <i>C8A</i>    | c.1558C>T  | p.Arg520 Cys | D/D/N | AR/Het | 3 | <p><b>Clinical features:</b><br/>Progressive neurological disorder with no systemic symptoms or other organ involvement.</p> <p><b>Investigations:</b> MRI brain showed cystic encephalomalacia affecting left frontal lobe, right occipital lobe and right temporal lobe. Meningeal biopsy showed</p>                                                                                                                                                                                         | Unclassified neuroinflammatory disease |
|    |  |   |          | <i>ELN</i>    | c.1363G>A  | p.Ala455 Thr | ././N | AD/Het | 3 |                                                                                                                                                                                                                                                                                                                                                                                                                                                                                                |                                        |
|    |  |   |          | <i>GATA2</i>  | c.481C>G   | p.Pro161 Ala | T/D/D | AD/Het | 3 |                                                                                                                                                                                                                                                                                                                                                                                                                                                                                                |                                        |
|    |  |   |          | <i>NOD2</i>   | c.1292C>T  | p.Ser431 Leu | D/P/N | AD/Het | 3 |                                                                                                                                                                                                                                                                                                                                                                                                                                                                                                |                                        |
|    |  |   |          | <i>NOD2</i>   | c.1390G>A  | p.Gly464Arg  | T/P/N | AD/Het | 3 |                                                                                                                                                                                                                                                                                                                                                                                                                                                                                                |                                        |
|    |  |   |          | <i>NOD2</i>   | c.2377G>A  | p.Val793 Met | D/P/D | AD/Het | 3 |                                                                                                                                                                                                                                                                                                                                                                                                                                                                                                |                                        |

|    |  |   |    |                 |           |              |       |        |   |                                                                                                                                                                                                                                                                                                                                                                                                                                                                 |                                        |
|----|--|---|----|-----------------|-----------|--------------|-------|--------|---|-----------------------------------------------------------------------------------------------------------------------------------------------------------------------------------------------------------------------------------------------------------------------------------------------------------------------------------------------------------------------------------------------------------------------------------------------------------------|----------------------------------------|
|    |  |   |    | <i>PEX26</i>    | c.911G>A  | p.Arg304His  | T/B/N | AR/Het | 3 | lymphocytic infiltrate and reactive gliosis. Autoantibodies negative. Negative CSF OGB.<br><b>Treatment:</b> corticosteroids, mycophenolate mofetil.                                                                                                                                                                                                                                                                                                            |                                        |
|    |  |   |    | <i>PHYH</i>     | c.238C>T  | p.Arg80Cys   | T/B/D | AR/Het | 3 |                                                                                                                                                                                                                                                                                                                                                                                                                                                                 |                                        |
|    |  |   |    | <i>RNASE T2</i> | c.643G>A  | p.Glu215Lys  | T/D/N | AR/Het | 3 |                                                                                                                                                                                                                                                                                                                                                                                                                                                                 |                                        |
|    |  |   |    | <i>TSC2</i>     | c.3140T>C | p.Val1047Ala | T/B/D | AD/Het | 3 |                                                                                                                                                                                                                                                                                                                                                                                                                                                                 |                                        |
|    |  |   |    | <i>TUFM</i>     | c.760G>A  | p.Ala254Thr  | T/B/N | AR/Het | 3 |                                                                                                                                                                                                                                                                                                                                                                                                                                                                 |                                        |
|    |  |   |    | <i>USP18</i>    | c.974A>G  | p.Asn325Ser  | T/B/N | AR/Het | 3 |                                                                                                                                                                                                                                                                                                                                                                                                                                                                 |                                        |
|    |  |   |    | <i>WDR1</i>     | c.512C>T  | p.Ala171Val  | T/B/D | -/Het  | 3 |                                                                                                                                                                                                                                                                                                                                                                                                                                                                 |                                        |
| 48 |  | F | 14 | <i>ATP7B</i>    | c.442C>T  | p.Arg148Trp  | D/D/D | AR/Het | 3 | <b>Clinical features:</b> Spasticity, dystonia, sensory neuropathy, severe myopia and astigmatism, episode of right sided hemiparesis and collapse. No systemic symptoms or other organ involvement.<br><b>Investigations:</b> MRI/MRA brain showed subacute right intraventricular haemorrhage and a left MCA infarct with involvement of the basal ganglia associated with cerebral oedema. MRA showed irregular narrowing of the left ICA and distal basilar | Unclassified neuroinflammatory disease |
|    |  |   |    | <i>C7</i>       | c.1606G>A | p.Val536Ile  | T/B/N | -/Het  | 3 |                                                                                                                                                                                                                                                                                                                                                                                                                                                                 |                                        |
|    |  |   |    | <i>COL4A1</i>   | c.1673C>T | p.Ala558Val  | T/B/D | AD/Het | 3 |                                                                                                                                                                                                                                                                                                                                                                                                                                                                 |                                        |
|    |  |   |    | <i>FBNI</i>     | c.5865G>T | p.Gln1955His | T/B/D | AD/Het | 3 |                                                                                                                                                                                                                                                                                                                                                                                                                                                                 |                                        |
|    |  |   |    | <i>HEPACAM</i>  | c.139G>A  | p.Val47Met   | T/D/D | AR/Het | 3 |                                                                                                                                                                                                                                                                                                                                                                                                                                                                 |                                        |
|    |  |   |    | <i>LPIN2</i>    | c.1876C>T | p.Pro626Ser  | T/B/N | -/Het  | 3 |                                                                                                                                                                                                                                                                                                                                                                                                                                                                 |                                        |
|    |  |   |    | <i>NDUFS2</i>   | c.1234G>C | p.Val412Leu  | D/B/D | AR/Het | 3 |                                                                                                                                                                                                                                                                                                                                                                                                                                                                 |                                        |
|    |  |   |    | <i>USP18</i>    | c.974A>G  | p.Asn325Ser  | T/B/N | AR/Het | 3 |                                                                                                                                                                                                                                                                                                                                                                                                                                                                 |                                        |

|    |             |           |                  |                |                     |                       |       |            |   |                                                                                                                                                                                                                                                                                                                                                                                                                                                                                                                                                                                                           |                                                                                                                                                          |  |
|----|-------------|-----------|------------------|----------------|---------------------|-----------------------|-------|------------|---|-----------------------------------------------------------------------------------------------------------------------------------------------------------------------------------------------------------------------------------------------------------------------------------------------------------------------------------------------------------------------------------------------------------------------------------------------------------------------------------------------------------------------------------------------------------------------------------------------------------|----------------------------------------------------------------------------------------------------------------------------------------------------------|--|
|    |             |           |                  |                |                     |                       |       |            |   |                                                                                                                                                                                                                                                                                                                                                                                                                                                                                                                                                                                                           | artery.<br>Negative CSF OGB and normal CSF neopterins. Negative autoantibody screen and no acute phase response.<br><b>Treatment:</b><br>corticosteroids |  |
| 49 |             | M         | 8                | <i>ATP7B</i>   | c.4175T>C           | p.Met139<br>2Thr      | T/B/D | AR/Het     | 3 | <b>Clinical features:</b> Severe bilateral optic atrophy and visual impairment, bulbar palsy, hearing loss. No systemic symptoms or other organ involvement.<br><b>Investigations:</b> MRI brain showed extensive dural thickening most prominently along the right frontal convexity with cavernous sinus involvement and narrowing of the left ICA, signal abnormality associated with extensive dural enhancement along the left cerebellar hemisphere and obliteration of the left sigmoid sinus where it drains into the internal jugular vein on the left, consistent with jugular vein thrombosis. | Likely STA-4 deficiency, novel disease on-going functional experiments                                                                                   |  |
|    |             |           |                  | <i>C5</i>      | c.4133A>T           | p.Tyr137<br>8Phe      | T/B/N | AD/Het     | 3 |                                                                                                                                                                                                                                                                                                                                                                                                                                                                                                                                                                                                           |                                                                                                                                                          |  |
|    |             |           |                  | <i>C6</i>      | c.11G>T             | p.Arg4Leu             | T/B/N | -/Het      | 3 |                                                                                                                                                                                                                                                                                                                                                                                                                                                                                                                                                                                                           |                                                                                                                                                          |  |
|    |             |           |                  | <i>CBL</i>     | c.105_106ins<br>CAC | p.His42_<br>L43insHis | ././  | AD;Smu/Hom | 3 |                                                                                                                                                                                                                                                                                                                                                                                                                                                                                                                                                                                                           |                                                                                                                                                          |  |
|    |             |           |                  | <i>CBS</i>     | c.1273G>A           | p.Val425<br>Met       | D/D/D | AR/Het     | 3 |                                                                                                                                                                                                                                                                                                                                                                                                                                                                                                                                                                                                           |                                                                                                                                                          |  |
|    |             |           |                  | <i>CFHR5</i>   | c.427A>C            | p.Thr143<br>Pro       | T/P/N | AD/Het     | 3 |                                                                                                                                                                                                                                                                                                                                                                                                                                                                                                                                                                                                           |                                                                                                                                                          |  |
|    |             |           |                  | <i>COL3A1</i>  | c.130G>A            | p.Val<br>44Ile        | T/D/D | AD/Het     | 3 |                                                                                                                                                                                                                                                                                                                                                                                                                                                                                                                                                                                                           |                                                                                                                                                          |  |
|    |             |           |                  | <i>COQ8A</i>   | c.1876C>T           | p.Arg626<br>Cys       | T/B/N | AR/Het     | 3 |                                                                                                                                                                                                                                                                                                                                                                                                                                                                                                                                                                                                           |                                                                                                                                                          |  |
|    |             |           |                  | <i>COX10</i>   | c.773T>A            | p.Leu<br>258His       | D/D/D | AR; MI/Het | 3 |                                                                                                                                                                                                                                                                                                                                                                                                                                                                                                                                                                                                           |                                                                                                                                                          |  |
|    |             |           |                  | <i>CSF1R</i>   | c.721A>G            | p.N241<br>Asp         | T/B/N | AD/Het     | 3 |                                                                                                                                                                                                                                                                                                                                                                                                                                                                                                                                                                                                           |                                                                                                                                                          |  |
|    |             |           |                  | <i>CYP27A1</i> | c.506C>T            | p.Ala<br>169Val       | T/P/N | AR/Het     | 3 |                                                                                                                                                                                                                                                                                                                                                                                                                                                                                                                                                                                                           |                                                                                                                                                          |  |
|    |             |           |                  | <i>ELN</i>     | c.931G>A            | p.Ala311<br>Thr       | D/D/D | AD/Het     | 3 |                                                                                                                                                                                                                                                                                                                                                                                                                                                                                                                                                                                                           |                                                                                                                                                          |  |
|    | <i>FBN2</i> | c.4784C>T | p.Thr159<br>5Ile | T/B/N          | AD/Het              | 3                     |       |            |   |                                                                                                                                                                                                                                                                                                                                                                                                                                                                                                                                                                                                           |                                                                                                                                                          |  |

|    |  |   |    |                |                 |                   |       |            |   |                                                                                                                                                                                                                                 |
|----|--|---|----|----------------|-----------------|-------------------|-------|------------|---|---------------------------------------------------------------------------------------------------------------------------------------------------------------------------------------------------------------------------------|
|    |  |   |    | <i>FOXP3</i>   | c.171_173del    | p.Ser60del        | ./.   | AR;XLR/Hom | 3 | Necrotising granulomatous inflammation on brain biopsy. Negative autoantibodies. normal ACE, no infection identified (including TB and atypical TB).<br><b>Treatment:</b> anti TB medication, corticosteroids and azathioprine. |
|    |  |   |    | <i>ITPR3</i>   | c.1588G>C       | p.Gly530Arg       | T/D/D | AR/Het     | 3 |                                                                                                                                                                                                                                 |
|    |  |   |    | <i>NOTCH1</i>  | c.6454G>C       | p.Gly2152Arg      | T/B/  | AD/Het     | 3 |                                                                                                                                                                                                                                 |
|    |  |   |    | <i>PEX1</i>    | c.1142C>A       | p.Ala381Asp       | D/B/N | AR/Het     | 3 |                                                                                                                                                                                                                                 |
|    |  |   |    | <i>PHYH</i>    | c.568G>A        | p.Val190Ile       | T/D/D | AR/Het     | 3 |                                                                                                                                                                                                                                 |
|    |  |   |    | <i>POLG</i>    | c.158_159insGCA | p.Gln55_P56insGln | ./.   | AD;AR/Het  | 3 |                                                                                                                                                                                                                                 |
|    |  |   |    | <i>RNF213</i>  | c.103G>A        | p.Glu35Lys        | T/B/N | -/Het      | 3 |                                                                                                                                                                                                                                 |
|    |  |   |    | <i>SLC29A3</i> | c.74G>A         | p.Arg25Gln        | T/B/N | AR/Het     | 3 |                                                                                                                                                                                                                                 |
|    |  |   |    | <i>STAT4</i>   | Exon 4 Deletion | -                 | -     | -/Hom      | - |                                                                                                                                                                                                                                 |
|    |  |   |    | <i>TMEM173</i> | c.659G>A        | p.Arg220His       | T/B/N | AD/Het     | 3 |                                                                                                                                                                                                                                 |
|    |  |   |    | <i>TSC2</i>    | c.4316G>A       | p.Gly1439Asp      | T/P/N | AD/Het     | 3 |                                                                                                                                                                                                                                 |
|    |  |   |    | <i>TTC37</i>   | c.4414A>G       | p.Thr1472Ala      | T/B/N | AR/Het     | 3 |                                                                                                                                                                                                                                 |
|    |  |   |    | <i>UNC13D</i>  | c.740T>G        | p.Val247Gly       | D/D/D | -/Het      | 3 |                                                                                                                                                                                                                                 |
|    |  |   |    | <i>USP18</i>   | c.974A>G        | p.Asn325Ser       | T/B/N | AR/Het     | 3 |                                                                                                                                                                                                                                 |
|    |  |   |    | <i>USP18</i>   | c.1089T>A       | p.Tyr363Xaa       | ./D   | AR/Het     | 3 |                                                                                                                                                                                                                                 |
| 50 |  | M | 14 | <i>ADAR</i>    | c.1577A>G       | p.Gln526Arg       | D/D/D | AD;AR/Het  | 3 | <b>Clinical features:</b><br>Systemic lupus                                                                                                                                                                                     |



|    |  |   |    |                 |            |                   |       |           |   |                                                                                                                                                                                                                                                                                    |                                        |
|----|--|---|----|-----------------|------------|-------------------|-------|-----------|---|------------------------------------------------------------------------------------------------------------------------------------------------------------------------------------------------------------------------------------------------------------------------------------|----------------------------------------|
|    |  |   |    | <i>CTCI</i>     | c.1795C>T  | p.Pro599 Ser      | T/B/N | AR/Het    | 3 | erythematous disease with skin rashes, arthralgia.<br><b>Investigations:</b> positive ANA and dsDNA antibodies, with worsening leucoencephalopathy on MRI brain imaging, but no intracerebral calcification.<br><b>Treatment:</b> corticosteroids, cyclophosphamide and rituximab. | Likely systemic lupus erythematous     |
|    |  |   |    | <i>MASP2</i>    | c.1351G>A  | p.Ala451 Thr      | T/B/P | AR/Het    | 3 |                                                                                                                                                                                                                                                                                    |                                        |
|    |  |   |    | <i>MFN2</i>     | c.439C>A   | p.Leu147I le      | T/B/D | AD;AR/Het | 3 |                                                                                                                                                                                                                                                                                    |                                        |
|    |  |   |    | <i>MYLK</i>     | c.1007C>T  | p.Pro336 Leu      | D/P/N | AD/Het    | 3 |                                                                                                                                                                                                                                                                                    |                                        |
|    |  |   |    | <i>PSTPIP 1</i> | c.203C>T   | p.Thr68Met        | T/P/D | AD/Het    | 3 |                                                                                                                                                                                                                                                                                    |                                        |
|    |  |   |    | <i>RANBP 2</i>  | c.2339C>T  | p.Pro780 Leu      | D/B/D | AD/Het    | 3 |                                                                                                                                                                                                                                                                                    |                                        |
|    |  |   |    | <i>RANBP 2</i>  | c.6362A>G  | p.Gln2121 Arg     | T/D/D | AD/Het    | 3 |                                                                                                                                                                                                                                                                                    |                                        |
|    |  |   |    | <i>RNF213</i>   | c.15017C>T | p.Ser5006 Leu     | T/B/N | -/Het     | 3 |                                                                                                                                                                                                                                                                                    |                                        |
|    |  |   |    | <i>TGFBR 2</i>  | c.374delA  | p.Lys128 Serfs*34 | ././  | AD/Hom    | 3 |                                                                                                                                                                                                                                                                                    |                                        |
|    |  |   |    | <i>UNC13 D</i>  | c.2782C>T  | p.Arg928 Cys      | T/B/N | -/Het     | 3 |                                                                                                                                                                                                                                                                                    |                                        |
| 51 |  | F | 10 | <i>C5</i>       | c.512T>C   | p.Val171 Ala      | D/D/D | AD/Het    | 3 | <b>Clinical features:</b> Acute onset hemiplegia and encephalopathy. No systemic symptoms or other organ involvement.<br><b>Investigations:</b> MRI/MRA showed bilateral multifocal vasculopathy. Negative autoantibody screen and no acute phase                                  | Unclassified neuroinflammatory disease |
|    |  |   |    | <i>C7</i>       | c.1258A>C  | p.Lys420 Gln      | D/D/D | -/Het     | 3 |                                                                                                                                                                                                                                                                                    |                                        |
|    |  |   |    | <i>C8B</i>      | c.1625C>T  | p.Thr542I le      | T/B/N | AR/Het    | 3 |                                                                                                                                                                                                                                                                                    |                                        |
|    |  |   |    | <i>CBS</i>      | c.518T>C   | p.Ile173Thr       | D/D/A | AR/Het    | 4 |                                                                                                                                                                                                                                                                                    |                                        |
|    |  |   |    | <i>CLEC16 A</i> | c.2728G>A  | p.Gly910 Ser      | T/P/D | -/Het     | 3 |                                                                                                                                                                                                                                                                                    |                                        |
|    |  |   |    | <i>EIF2B3</i>   | c.407A>G   | p.Gln136 Arg      | T/B/N | AR/Het    | 3 |                                                                                                                                                                                                                                                                                    |                                        |

|    |  |   |   |                 |           |                      |       |           |   |                                                                                                                                                                                                                                                                                                            |                                        |
|----|--|---|---|-----------------|-----------|----------------------|-------|-----------|---|------------------------------------------------------------------------------------------------------------------------------------------------------------------------------------------------------------------------------------------------------------------------------------------------------------|----------------------------------------|
|    |  |   |   | <i>ELN</i>      | c.328A>g  | p.Ala110<br>Thr      | D/D/D | AD/Het    | 3 | response. Negative CSF OGB.<br><b>Treatment:</b><br>Corticosteroids, IVIG                                                                                                                                                                                                                                  |                                        |
|    |  |   |   | <i>GJC2</i>     | c.1067A>G | p.Gln356<br>Arg      | T/B/N | AD;AR/Het | 3 |                                                                                                                                                                                                                                                                                                            |                                        |
|    |  |   |   | <i>RANBP2</i>   | c.7754T>C | p.Ile2585<br>Thr     | T/B/N | AD/Het    | 3 |                                                                                                                                                                                                                                                                                                            |                                        |
|    |  |   |   | <i>RNF213</i>   | c.6551A>G | p.Gln218<br>4Arg     | T/B/N | AD/Het    | 3 |                                                                                                                                                                                                                                                                                                            |                                        |
|    |  |   |   | <i>TGFBR2</i>   | c.374delA | p.Lys128<br>Serfs*34 | ./.   | AD/Hom    | 3 |                                                                                                                                                                                                                                                                                                            |                                        |
|    |  |   |   | <i>TSC2</i>     | c.856A>G  | p.Met286<br>Val      | T/B/N | AD/Het    | 3 |                                                                                                                                                                                                                                                                                                            |                                        |
|    |  |   |   | <i>USP18</i>    | c.295G>A  | p.Val99Ile           | T/D/N | AR/Het    | 3 |                                                                                                                                                                                                                                                                                                            |                                        |
|    |  |   |   | <i>USP18</i>    | c.974A>G  | p.Asn325<br>Ser      | T/B/N | AR/Het    | 3 |                                                                                                                                                                                                                                                                                                            |                                        |
|    |  |   |   | <i>USP18</i>    | c.1115G>T | p.Cys372<br>Phe      | D/B/N | AR/Het    | 3 |                                                                                                                                                                                                                                                                                                            |                                        |
|    |  |   |   | <i>GLA</i>      | c.61C>T   | p.Leu21Phe           | T/B/N | XL/Het    | 3 |                                                                                                                                                                                                                                                                                                            |                                        |
| 52 |  | M | 3 | <i>AARS2</i>    | c.1661G>A | p.Arg554<br>His      | T/B/D | AR/Het    | 3 | <b>Clinical features:</b><br>Encephalopathy<br><b>Investigations:</b> MRI brain suggestive of diffuse necrotising encephalopathy clinical presentation. No systemic symptoms or other organ involvement. Positive ANA and ACL antibodies at presentation subsequently negative when tested 12 weeks later. | Unclassified neuroinflammatory disease |
|    |  |   |   | <i>EIF2B3</i>   | c.1025C>T | p.Ser342<br>Leu      | T/B/N | AR/Het    | 3 |                                                                                                                                                                                                                                                                                                            |                                        |
|    |  |   |   | <i>LPIN2</i>    | c.755C>T  | p.Ala252<br>Val      | T/B/N | -/Het     | 3 |                                                                                                                                                                                                                                                                                                            |                                        |
|    |  |   |   | <i>MEFV</i>     | c.442G>C  | p.Glu148<br>Gln      | D/D/P | AD;AR/Het | 3 |                                                                                                                                                                                                                                                                                                            |                                        |
|    |  |   |   | <i>SLC25A12</i> | c.995T>G  | p.Leu332<br>Arg      | D/D/D | AR/Het    | 3 |                                                                                                                                                                                                                                                                                                            |                                        |

|    |               |           |                 |                |                       |                               |       |        |   |                                                                                                                                                                                                                                                                                                                               |                                                |  |
|----|---------------|-----------|-----------------|----------------|-----------------------|-------------------------------|-------|--------|---|-------------------------------------------------------------------------------------------------------------------------------------------------------------------------------------------------------------------------------------------------------------------------------------------------------------------------------|------------------------------------------------|--|
|    |               |           |                 |                |                       |                               |       |        |   |                                                                                                                                                                                                                                                                                                                               | <b>Treatment:</b><br>corticosteroids and IVIG. |  |
| 53 |               | F         | 2               | <i>C2</i>      | c.839_849del          | p.Met280<br>Asnfs*3           | ./.   | AR/Het | 3 | <b>Clinical features:</b> Fever, maculopapular rash, encephalopathy, anaemia, lymphadenopathy, hepatosplenomegaly.<br><b>Investigations:</b> MRI brain showed diffuse oedema. Positive CSF OGB. Negative autoantibodies and extensive infection screen negative.<br><b>Treatment:</b> corticosteroids, IVIG, plasma exchange. | Unclassified neuroinflammatory disease         |  |
|    |               |           |                 | <i>C5</i>      | c.2653C>T             | p.Arg885<br>Cys               | T/P/N | AD/Het | 3 |                                                                                                                                                                                                                                                                                                                               |                                                |  |
|    |               |           |                 | <i>C5</i>      | c.1060C>A             | p. Leu<br>354Met              | D/D/D | AD/Het | 3 |                                                                                                                                                                                                                                                                                                                               |                                                |  |
|    |               |           |                 | <i>CYP27A1</i> | c.536A>G              | p.Asn179<br>Ser               | D/P/D | AR/Het | 3 |                                                                                                                                                                                                                                                                                                                               |                                                |  |
|    |               |           |                 | <i>CYP27A1</i> | c.1151C>T             | p.Pro384<br>Leu               | D/D/D | AR/Het | 3 |                                                                                                                                                                                                                                                                                                                               |                                                |  |
|    |               |           |                 | <i>NDUFA1</i>  | c.199G>A              | p.Val67Ile                    | D/B/N | AR/Het | 3 |                                                                                                                                                                                                                                                                                                                               |                                                |  |
|    |               |           |                 | <i>PEX10</i>   | c.880A>G              | p.Thr294<br>Ala               | T/D/D | AR/Het | 3 |                                                                                                                                                                                                                                                                                                                               |                                                |  |
|    |               |           |                 | <i>PEX2</i>    | c.748T>C              | p.Trp250<br>Arg               | T/D/D | AR/Het | 3 |                                                                                                                                                                                                                                                                                                                               |                                                |  |
|    |               |           |                 | <i>PYCR2</i>   | c.898C>G              | p.Leu300<br>Val               | D/B/N | AR/Het | 3 |                                                                                                                                                                                                                                                                                                                               |                                                |  |
|    |               |           |                 | <i>SAMD3</i>   | c.1378G>A             | p.Asp460<br>Asn               | T/D/D | -/Het  | 3 |                                                                                                                                                                                                                                                                                                                               |                                                |  |
|    |               |           |                 | <i>SLCIA4</i>  | c.40G>A               | p.Ala14Tj<br>r                | T/B/D | AR/Het | 3 |                                                                                                                                                                                                                                                                                                                               |                                                |  |
|    |               |           |                 | <i>STAT2</i>   | c.2478G>T             | p.Gln826<br>His               | D/B/N | AR/Het | 3 |                                                                                                                                                                                                                                                                                                                               |                                                |  |
|    |               |           |                 | <i>TRAP1</i>   | c.1432_1433<br>insCCG | p.Ser477_<br>Gly<br>478insAla | ./.   | -/Het  | 3 |                                                                                                                                                                                                                                                                                                                               |                                                |  |
|    | <i>TRAP1</i>  | c.1429T>G | p.Ser477<br>Ala | T/B/N          | -/Het                 | 3                             |       |        |   |                                                                                                                                                                                                                                                                                                                               |                                                |  |
|    | <i>UNC13D</i> | c.2782C>T | p.Arg928<br>Cys | T/B/N          | -/Het                 | 3                             |       |        |   |                                                                                                                                                                                                                                                                                                                               |                                                |  |

|    |  |   |    |               |                        |                             |       |           |   |                                                                                                                                                                                                                                                                                                                                                                                                                               |                                        |
|----|--|---|----|---------------|------------------------|-----------------------------|-------|-----------|---|-------------------------------------------------------------------------------------------------------------------------------------------------------------------------------------------------------------------------------------------------------------------------------------------------------------------------------------------------------------------------------------------------------------------------------|----------------------------------------|
|    |  |   |    | <i>USP18</i>  | c.974A>G               | p.Asn325<br>Ser             | T/B/N | AR/Het    | 3 |                                                                                                                                                                                                                                                                                                                                                                                                                               |                                        |
| 54 |  | M | 11 | <i>C8B</i>    | c.444C>G               | p.Asp148<br>Glu             | D/D/D | AR/Het    | 3 | <p><b>Clinical features:</b> Febrile induced epilepsy refractory to treatment.</p> <p><b>Investigations:</b> MRI brain showed symmetrical contrast enhancing basal ganglia and external capsule, cerebral cortex and frontal lobe lesions associated with brain atrophy. Normal spinal appearances. Extensive metabolic, infectious disease and rheumatological causes excluded.</p> <p><b>Treatment:</b> Corticosteroids</p> | Unclassified neuroinflammatory disease |
|    |  |   |    | <i>RANBP2</i> | c.6362A>G              | p.Gln212<br>1Arg            | T/D/D | AD/Het    | 3 |                                                                                                                                                                                                                                                                                                                                                                                                                               |                                        |
|    |  |   |    | <i>C6</i>     | c.1355G>A              | p. Gly<br>452Glu            | D/B/N | -/Het     | 3 |                                                                                                                                                                                                                                                                                                                                                                                                                               |                                        |
|    |  |   |    | <i>C6</i>     | c.10C>T                | p.Arg4Cys                   | T/B/N | -/Het     | 3 |                                                                                                                                                                                                                                                                                                                                                                                                                               |                                        |
|    |  |   |    | <i>PEX1</i>   | c.1579A>G              | p. Thr527<br>Ala            | T/B/D | AR/Het    | 3 |                                                                                                                                                                                                                                                                                                                                                                                                                               |                                        |
|    |  |   |    | <i>PEX2</i>   | c.748T>C               | p. Trp250<br>Arg            | T/D/D | AR/Het    | 3 |                                                                                                                                                                                                                                                                                                                                                                                                                               |                                        |
|    |  |   |    | <i>TRAP1</i>  | c.598A>G /<br>c.757A>G | p. Ile200Val /<br>Ile253Val | T/B/D | -/Het     | 3 |                                                                                                                                                                                                                                                                                                                                                                                                                               |                                        |
|    |  |   |    | <i>PEX26</i>  | c.457C>G               | p. Leu153<br>Val            | T/B/N | AR/Het    | 3 |                                                                                                                                                                                                                                                                                                                                                                                                                               |                                        |
| 55 |  | F | 7  | <i>EIF2B4</i> | c.913C>G               | p. Arg305<br>Gly            | T/B/N | AR/Het    | 3 | <p><b>Clinical features:</b> Spasticity, dystonia, bulbar symptoms with dysphagia, speech regression, microcephaly. No systemic symptoms or other organ involvement.</p> <p><b>Investigations:</b> MRI brain showed lack of myelin maturation in frontal lobes, no leukodystrophy. Negative autoantibody screen and no systemic</p>                                                                                           | Unclassified neuroinflammatory disease |
|    |  |   |    | <i>NLRC4</i>  | c.2785G>T              | p. Ala929<br>Ser            | T/B/. | AD/Het    | 3 |                                                                                                                                                                                                                                                                                                                                                                                                                               |                                        |
|    |  |   |    | <i>COL3A1</i> | c.505C>T               | p. Leu169<br>Phe            | T/B/N | AD/Het    | 3 |                                                                                                                                                                                                                                                                                                                                                                                                                               |                                        |
|    |  |   |    | <i>CFI</i>    | c.1322A>G              | p. Lys441<br>Arg            | T/B/N | AD;AR/Het | 3 |                                                                                                                                                                                                                                                                                                                                                                                                                               |                                        |
|    |  |   |    | <i>ETFDH</i>  | c.572G>A               | p. Gly191<br>Asp            | D/P/D | AR/Het    | 3 |                                                                                                                                                                                                                                                                                                                                                                                                                               |                                        |
|    |  |   |    | <i>OTULIN</i> | c.345G>T               | p. Gln115<br>His            | T/B/D | AR/Het    | 3 |                                                                                                                                                                                                                                                                                                                                                                                                                               |                                        |
|    |  |   |    | <i>C2</i>     | c.1922T>C              | p. Val641<br>Ala            | T/B/N | AR/Het    | 3 |                                                                                                                                                                                                                                                                                                                                                                                                                               |                                        |

|    |  |   |    |                     |            |                  |       |           |   |                                                                                                                                                                                                                                                                                                                                                                                                                                                                                            |                                        |
|----|--|---|----|---------------------|------------|------------------|-------|-----------|---|--------------------------------------------------------------------------------------------------------------------------------------------------------------------------------------------------------------------------------------------------------------------------------------------------------------------------------------------------------------------------------------------------------------------------------------------------------------------------------------------|----------------------------------------|
|    |  |   |    | <i>SPTAN1</i>       | c.3803T>C  | p.Val126<br>8Ala | D/D/D | AR/Het    | 3 | symptoms or other organ involvement. <b>Treatment:</b> IVIG.                                                                                                                                                                                                                                                                                                                                                                                                                               |                                        |
|    |  |   |    | <i>MEFV</i>         | c.1222C>T  | p.Arg408<br>Trp  | T/B/N | AD;AR/Het | 3 |                                                                                                                                                                                                                                                                                                                                                                                                                                                                                            |                                        |
|    |  |   |    | <i>ALDH3<br/>A2</i> | c.1270C>T  | p.Pro424<br>Ser  | T/B/D | AR/Het    | 3 |                                                                                                                                                                                                                                                                                                                                                                                                                                                                                            |                                        |
|    |  |   |    | <i>GFAP</i>         | c.1288C>T  | p.Arg430<br>Cys  | D/B/D | AD/Het    | 3 |                                                                                                                                                                                                                                                                                                                                                                                                                                                                                            |                                        |
|    |  |   |    | <i>USP18</i>        | c.1115G>T  | p.Cys372<br>Phe  | D/B/N | AR/Het    | 3 |                                                                                                                                                                                                                                                                                                                                                                                                                                                                                            |                                        |
| 56 |  | M | 11 | <i>EIF2B5</i>       | c.1202G>A  | p.Arg401<br>Gln  | T/B/N | AR/Het    | 3 | <b>Clinical features:</b><br>Encephalopathy, seizures, cognitive dysfunction. No systemic symptoms or other organ involvement.<br><b>Investigations:</b> MRI brain showed diffuse cortical blurring with symmetrical signal abnormality in the claustra adjacent to the external capsules and the juxtacortical white matter of the right temporal lobe. No spinal pathology. Negative autoantibody profile and no acute phase response.<br><b>Treatment:</b><br>corticosteroids and IVIG. | Unclassified neuroinflammatory disease |
|    |  |   |    | <i>CLCN2</i>        | c.218G>A   | p.Arg73H<br>is   | T/B/D | AD;AR/Het | 3 |                                                                                                                                                                                                                                                                                                                                                                                                                                                                                            |                                        |
|    |  |   |    | <i>TTC37</i>        | c.3808C>G  | p.Pro1270<br>Ala | T/B/D | AR/Het    | 3 |                                                                                                                                                                                                                                                                                                                                                                                                                                                                                            |                                        |
|    |  |   |    | <i>RARS</i>         | c.982G>A   | p.Val328I<br>le  | T/B/N | AR/Het    | 3 |                                                                                                                                                                                                                                                                                                                                                                                                                                                                                            |                                        |
|    |  |   |    | <i>GALC</i>         | c.17A>G    | p.His6Ar<br>g    | D/B/N | AR/Het    | 3 |                                                                                                                                                                                                                                                                                                                                                                                                                                                                                            |                                        |
|    |  |   |    | <i>NDUFA<br/>F1</i> | c.215C>G   | p.Thr72S<br>er   | T/B/N | AR/Het    | 3 |                                                                                                                                                                                                                                                                                                                                                                                                                                                                                            |                                        |
|    |  |   |    | <i>RNF213</i>       | c.14999A>G | p.Gln500<br>0Arg | D/D/D | -/Het     | 3 |                                                                                                                                                                                                                                                                                                                                                                                                                                                                                            |                                        |
|    |  |   |    | <i>USP18</i>        | c.295G>A   | p.Val99I<br>e    | T/P/N | AR/Het    | 3 |                                                                                                                                                                                                                                                                                                                                                                                                                                                                                            |                                        |
|    |  |   |    | <i>MEFV</i>         | c.442G>C   | p.Glu148<br>Gln  | D/D/P | AD;AR/Het | 3 |                                                                                                                                                                                                                                                                                                                                                                                                                                                                                            |                                        |
|    |  |   |    | <i>ARSA</i>         | c.*96A>G   | -                | ././  | AR/Het    | 3 |                                                                                                                                                                                                                                                                                                                                                                                                                                                                                            |                                        |
|    |  |   |    | <i>ARSA</i>         | c.1055A>G  | p.Asn352<br>Ser  | T/B/P | AR/Het    | 3 |                                                                                                                                                                                                                                                                                                                                                                                                                                                                                            |                                        |
| 57 |  | F | 13 | <i>LYST</i>         | c.8913T>G  | p.Asn297<br>1Lys | T/P/D | AR/Het    | 3 | <b>Clinical features:</b><br>Isolated episode of                                                                                                                                                                                                                                                                                                                                                                                                                                           |                                        |

|    |  |   |   |                 |           |                  |       |           |   |                                                                                                                                                                                                                                                                                                                                               |                                        |
|----|--|---|---|-----------------|-----------|------------------|-------|-----------|---|-----------------------------------------------------------------------------------------------------------------------------------------------------------------------------------------------------------------------------------------------------------------------------------------------------------------------------------------------|----------------------------------------|
|    |  |   |   | <i>LYST</i>     | c.5518T>G | p.Ser1840<br>Ala | T/B/D | AR/Het    | 3 | hemiplegia and ataxia. No systemic symptoms or other organ involvement.<br><b>Investigations:</b> MRI brain showed multiple white matter lesions in both hemispheres, posterior fossa, spinal cord with contrast enhancement and optic nerve swelling.<br>Negative autoantibody profile and no acute phase response.<br><b>Treatment:</b> Nil | Unclassified neuroinflammatory disease |
|    |  |   |   | <i>FBN2</i>     | c.68C>G   | p.Ala23Gly       | D/B/N | AD/Het    | 3 |                                                                                                                                                                                                                                                                                                                                               |                                        |
|    |  |   |   | <i>ELN</i>      | c.259T>C  | p.Phr87Leu       | D/B/N | AD/Het    | 3 |                                                                                                                                                                                                                                                                                                                                               |                                        |
|    |  |   |   | <i>PEX2</i>     | c.748T>C  | p.Trp250Arg      | T/D/D | AR/Het    | 3 |                                                                                                                                                                                                                                                                                                                                               |                                        |
|    |  |   |   | <i>SPTAN1</i>   | c.965A>C  | p.Gln322Pro      | T/P/D | AD/Het    | 3 |                                                                                                                                                                                                                                                                                                                                               |                                        |
|    |  |   |   | <i>CLEC16A</i>  | c.1024C>G | p.Leu342Val      | T/D/D | -/Het     | 3 |                                                                                                                                                                                                                                                                                                                                               |                                        |
|    |  |   |   | <i>PLCG2</i>    | c.2393A>G | p.Asn798Ser      | D/D/D | AD/Het    | 3 |                                                                                                                                                                                                                                                                                                                                               |                                        |
|    |  |   |   | <i>NF1</i>      | c.2342A>T | p.His781Leu      | T/B/D | AD/Het    | 3 |                                                                                                                                                                                                                                                                                                                                               |                                        |
|    |  |   |   | <i>LONP1</i>    | c.2485G>A | p.Ala829Thr      | T/B/N | AR/Het    | 3 |                                                                                                                                                                                                                                                                                                                                               |                                        |
|    |  |   |   | <i>CBS;CBSL</i> | c.833T>C  | p.Ile278Thr      | D/P/A | AR/Het    | 4 |                                                                                                                                                                                                                                                                                                                                               |                                        |
| 58 |  | F | 8 | <i>PLOD1</i>    | c.607C>A  | p.Arg203Ser      | D/B/D | AR/Het    | 3 | <b>Clinical features:</b> Microcephaly, seizure disorder. No systemic symptoms or other organ involvement.<br><b>Investigations:</b> MRI brain showed leukodystrophy and intracerebral calcification. Negative autoantibody profile and no acute phase response.                                                                              | Unclassified neuroinflammatory disease |
|    |  |   |   | <i>CFH</i>      | c.737G>C  | p.Arg246Thr      | T/D/D | AD;AR/Het | 3 |                                                                                                                                                                                                                                                                                                                                               |                                        |
|    |  |   |   | <i>CFHR5</i>    | c.329T>C  | p.Val110Ala      | D/P/N | AD/Het    | 3 |                                                                                                                                                                                                                                                                                                                                               |                                        |
|    |  |   |   | <i>COQ8A</i>    | c.25A>G   | p.Ile9Val        | D/B/D | AR/Het    | 3 |                                                                                                                                                                                                                                                                                                                                               |                                        |
|    |  |   |   | <i>LYST</i>     | c.8497G>A | p.Ala2833Thr     | D/B/N | AR/Het    | 3 |                                                                                                                                                                                                                                                                                                                                               |                                        |
|    |  |   |   | <i>GFMI</i>     | c.77A>G   | p.Lys26Arg       | T/B/D | AR/Het    | 3 |                                                                                                                                                                                                                                                                                                                                               |                                        |
|    |  |   |   | <i>TMEM173</i>  | c.1124G>T | p.Arg375Leu      | D/D/D | AD/Het    | 3 |                                                                                                                                                                                                                                                                                                                                               |                                        |

|    |  |   |    |                |              |                        |       |           |   |                                                                                                                                                                                                                                                     |                                        |
|----|--|---|----|----------------|--------------|------------------------|-------|-----------|---|-----------------------------------------------------------------------------------------------------------------------------------------------------------------------------------------------------------------------------------------------------|----------------------------------------|
|    |  |   |    | <i>EIF2B2</i>  | c.982A>G     | p.Ile328Val            | T/B/D | AR/Het    | 3 | <b>Treatment:</b><br>Corticosteroids                                                                                                                                                                                                                |                                        |
|    |  |   |    | <i>FBN1</i>    | c.4277G>C    | p.Gly1426Ala           | T/D/D | AD/Het    | 3 |                                                                                                                                                                                                                                                     |                                        |
|    |  |   |    | <i>MEFV</i>    | c.442G>C     | p.Glu148Gln            | D/D/P | AD;AR/Het | 3 |                                                                                                                                                                                                                                                     |                                        |
|    |  |   |    | <i>PSTPIP1</i> | c.1115C>T    | p.Ala372Val            | D/D/D | AD/Het    | 3 |                                                                                                                                                                                                                                                     |                                        |
|    |  |   |    | <i>TSC2</i>    | c.2348C>G    | p.Thr783Ser            | T/B/N | AD/Het    | 3 |                                                                                                                                                                                                                                                     |                                        |
| 59 |  | M | 1  | <i>CFHR5</i>   | c.1067G>A    | p.Arg356His            | T/P/N | AD/Het    | 3 | <b>Clinical features:</b> Seizure disorder. No systemic symptoms or other organ involvement.<br><b>Investigations:</b> Intracerebral calcification on CT brain. Negative autoantibody profile and no acute phase response.<br><b>Treatment:</b> Nil | Unclassified neuroinflammatory disease |
|    |  |   |    | <i>CFHR5</i>   | c.1412G>A    | p.Gly471Glu            | D/P/N | AD/Het    | 3 |                                                                                                                                                                                                                                                     |                                        |
|    |  |   |    | <i>TGFBR2</i>  | c.374del     | p.Lys128Serfs*34       | ./.   | AD/Het    | 3 |                                                                                                                                                                                                                                                     |                                        |
|    |  |   |    | <i>NOTCH1</i>  | c.4372G>A    | p.Ala1458Thr           | D/B/N | AD/Het    | 3 |                                                                                                                                                                                                                                                     |                                        |
|    |  |   |    | <i>MVK</i>     | c.877G>A     | p.Val293Met            | T/P/N | AD;AR/Het | 3 |                                                                                                                                                                                                                                                     |                                        |
|    |  |   |    | <i>PEX12</i>   | c.785_787del | p.Asp262_Trp263delinsG | ./.   | AR/Het    | 3 |                                                                                                                                                                                                                                                     |                                        |
|    |  |   |    | <i>RNF213</i>  | c.11882A>G   | p.Glu3961Gly           | T/B/N | -/Het     | 3 |                                                                                                                                                                                                                                                     |                                        |
|    |  |   |    | <i>PRX</i>     | c.731C>T     | p.Ala244Val            | T/B/N | AD;AR/Het | 3 |                                                                                                                                                                                                                                                     |                                        |
| 60 |  | M | 10 | <i>YYIAP1</i>  | c.320G>A     | p.Gly107Glu            | D/B/D | AR/Het    | 3 | <b>Clinical features:</b> Left sided hemiplegia and progressive motor function deterioration, ataxia.                                                                                                                                               | Unclassified neuroinflammatory disease |
|    |  |   |    | <i>CFHR5</i>   | c.1067G>A    | p.Arg356His            | T/P/N | AD/Het    | 3 |                                                                                                                                                                                                                                                     |                                        |
|    |  |   |    | <i>LYST</i>    | c.8806G>A    | p.Val2936Ile           | T/B/D | AR/Het    | 3 |                                                                                                                                                                                                                                                     |                                        |

|    |  |   |   |               |             |                     |       |           |   |                                                                                                                                                                                                                                                                                                                                                                                                                                 |                                        |
|----|--|---|---|---------------|-------------|---------------------|-------|-----------|---|---------------------------------------------------------------------------------------------------------------------------------------------------------------------------------------------------------------------------------------------------------------------------------------------------------------------------------------------------------------------------------------------------------------------------------|----------------------------------------|
|    |  |   |   | <i>IFIH1</i>  | c.2138C>G   | p.Thr713<br>Ser     | T/B/D | AD/Het    | 3 | <p><b>Investigations:</b> MRI brain showed diffuse predominantly white matter diseases in right frontal lobe involving the ipsilateral deep grey matter and extending into the right cerebral peduncle.</p> <p>Brain biopsy suggestive of perivascular inflammatory process predominantly lymphocytic. Negative autoantibody profile.</p> <p><b>Treatment:</b> corticosteroids, cyclophosphamide and mycophenolate mofetil.</p> |                                        |
|    |  |   |   | <i>TSC1</i>   | c.2194C>T   | p.His732<br>Tyr     | D/P/A | AD/Het    | 3 |                                                                                                                                                                                                                                                                                                                                                                                                                                 |                                        |
|    |  |   |   | <i>NOTCH1</i> | c.4129C>T   | p.Pro1377<br>Ser    | T/B/N | AD/Het    | 3 |                                                                                                                                                                                                                                                                                                                                                                                                                                 |                                        |
|    |  |   |   | <i>COL4A1</i> | c.161C>T    | p.Pro54L<br>eu      | D/D/D | AD/Het    | 3 |                                                                                                                                                                                                                                                                                                                                                                                                                                 |                                        |
|    |  |   |   | <i>RNF213</i> | c.5114C>A   | p.Thr170<br>5Lys    | D/.D  | -/Het     | 3 |                                                                                                                                                                                                                                                                                                                                                                                                                                 |                                        |
|    |  |   |   | <i>RNF213</i> | c.9952A>G   | p.Ile3318<br>Val    | T/B/N | -/Het     | 3 |                                                                                                                                                                                                                                                                                                                                                                                                                                 |                                        |
|    |  |   |   | <i>PRX</i>    | c.1483G>C   | p.Glu495<br>Gln     | T/B/D | AD;AR/Het | 3 |                                                                                                                                                                                                                                                                                                                                                                                                                                 |                                        |
| 61 |  | F | 6 | <i>LYST</i>   | c.5518T>G   | p.Ser1840<br>Ala    | T/B/D | AR/Het    | 3 | <p><b>Clinical features:</b> Bilateral optic atrophy with severe visual loss, oral ulceration, arthralgia, fatigue. No systemic symptoms or other organ involvement</p> <p><b>Investigations:</b> Negative autoantibody profile. Normal complement studies.</p> <p><b>Treatment:</b> corticosteroids.</p>                                                                                                                       | Unclassified neuroinflammatory disease |
|    |  |   |   | <i>RANBP2</i> | c.7172C>G   | p.Thr239<br>1Ser    | T/B/N | AD/Het    | 3 |                                                                                                                                                                                                                                                                                                                                                                                                                                 |                                        |
|    |  |   |   | <i>COL3A1</i> | c.1165A>T   | p.Asn389<br>Tyr     | D/B/N | AD/Het    | 3 |                                                                                                                                                                                                                                                                                                                                                                                                                                 |                                        |
|    |  |   |   | <i>GFMI</i>   | c.490C>T    | p.Arg164<br>Cys     | D/D/D | AR/Het    | 3 |                                                                                                                                                                                                                                                                                                                                                                                                                                 |                                        |
|    |  |   |   | <i>C6</i>     | c.2087A>G   | p.Asp696<br>Gly     | T/B/D | -/Het     | 3 |                                                                                                                                                                                                                                                                                                                                                                                                                                 |                                        |
|    |  |   |   | <i>C2</i>     | c.39_849del | p.Met280<br>Asnfs*3 | ././  | AR/Het    | 3 |                                                                                                                                                                                                                                                                                                                                                                                                                                 |                                        |
|    |  |   |   | <i>PSMB8</i>  | c.689A>G    | p.Tyr230<br>Cys     | D/B/D | AR/Het    | 3 |                                                                                                                                                                                                                                                                                                                                                                                                                                 |                                        |



|    |  |   |                |               |                     |                             |           |           |   |                                                                                                                                                                                                                                                       |                                        |
|----|--|---|----------------|---------------|---------------------|-----------------------------|-----------|-----------|---|-------------------------------------------------------------------------------------------------------------------------------------------------------------------------------------------------------------------------------------------------------|----------------------------------------|
|    |  |   |                | <i>POLG</i>   | c.158_159ins<br>GCA | p.Gln55_<br>Pro56ins<br>Gln | ././.     | AD;AR/Het | 3 |                                                                                                                                                                                                                                                       |                                        |
|    |  |   |                | <i>MYH11</i>  | c.5275G>A           | p.Val175<br>9Ile            | T/B/N     | AD/Het    | 3 |                                                                                                                                                                                                                                                       |                                        |
|    |  |   |                | <i>RNF213</i> | c.2122C>G           | p.His708<br>Asp             | T/B/N     | -/Het     | 3 |                                                                                                                                                                                                                                                       |                                        |
|    |  |   |                | <i>RNF213</i> | c.14194A>G          | p.Lys473<br>2Glu            | T/B/N     | -/Het     | 3 |                                                                                                                                                                                                                                                       |                                        |
|    |  |   |                | <i>USP18</i>  | c.974A>G            | p.Asn325<br>Ser             | T/B/N     | AR/Het    | 3 |                                                                                                                                                                                                                                                       |                                        |
| 62 |  | F | 14             | <i>LMNA</i>   | c.1672G>A           | p.Gly558<br>Arg             | D/P/D     | AD;AR/Het | 3 | <b>Clinical features:</b><br>Retinitis. No systemic symptoms or other organ involvement.<br><b>Investigations:</b> MRI brain showed leucoencephalopathy. Negative autoantibody profile and no acute phase response.<br><b>Treatment:</b> Nil          | Unclassified neuroinflammatory disease |
|    |  |   | <i>CYP27A1</i> | c.1151C>T     | p.Pro384<br>Leu     | D/D/D                       | AR/Het    | 3         |   |                                                                                                                                                                                                                                                       |                                        |
|    |  |   | <i>AARS2</i>   | c.967G>A      | p.Val323<br>Met     | D/D/D                       | AR/Het    | 3         |   |                                                                                                                                                                                                                                                       |                                        |
|    |  |   | <i>POLG</i>    | c.156_158del  | p.<br>Gln55del      | ././.                       | AD;AR/Hom | 3         |   |                                                                                                                                                                                                                                                       |                                        |
|    |  |   | <i>MEFV</i>    | c.910G>A      | p. Gly<br>304Arg    | D/B/N                       | AD;AR/Het | 3         |   |                                                                                                                                                                                                                                                       |                                        |
|    |  |   | <i>TRAP1</i>   | c.109C>T      | p.Arg37T<br>rp      | T/B/N                       | - /Het    | 3         |   |                                                                                                                                                                                                                                                       |                                        |
| 63 |  | F | 15             | <i>RANBP2</i> | c.6680A>G           | p.Tyr222<br>7Cys            | D/D/D     | AD/Het    | 3 | <b>Clinical features:</b><br>Relapsing-remitting MS like disorder characterised by seizures associated with autistic spectrum disorder and significant developmental delay.<br><b>Investigations:</b> MRI brain showed multiple, supratentorial white | Multiple sclerosis                     |
|    |  |   | <i>SUMF1</i>   | c.95C>T       | p.Ala32<br>Val      | T/P/N                       | AR/Het    | 3         |   |                                                                                                                                                                                                                                                       |                                        |
|    |  |   | <i>PSMB8</i>   | c.208A>T      | p.Thr70S<br>er      | D/D/D                       | AR/Het    | 3         |   |                                                                                                                                                                                                                                                       |                                        |
|    |  |   | <i>ITPR3</i>   | c.3489G>C     | p.Glu116<br>3Asp    | T/B/D                       | AR/Het    | 3         |   |                                                                                                                                                                                                                                                       |                                        |
|    |  |   | <i>PEX7</i>    | c.695G>A      | p.Arg232<br>Gln     | D/P/D/                      | AR/Het    | 3         |   |                                                                                                                                                                                                                                                       |                                        |

|    |  |   |           |                 |                    |                        |       |           |   |                                                                                                                                                                                                                                                                                                                                                                            |                                        |
|----|--|---|-----------|-----------------|--------------------|------------------------|-------|-----------|---|----------------------------------------------------------------------------------------------------------------------------------------------------------------------------------------------------------------------------------------------------------------------------------------------------------------------------------------------------------------------------|----------------------------------------|
|    |  |   |           | <i>ELN</i>      | c.1831G>A          | p.Gly611 Arg           | T/B/D | AD/Het    | 3 | matter lesions mostly in periventricular/callosal location with other foci of abnormality in the deep and subcortical white matter. Negative autoantibody profile. Normal biotinidase, negative autoantibodies including Aq4/MOG. Positive OGB<br><b>Treatment:</b> corticosteroids, rituximab, IVIG                                                                       |                                        |
|    |  |   |           | <i>COL4A1</i>   | c.1673C>T          | p.Ala558Val            | ./.   | AD/Het    | 3 |                                                                                                                                                                                                                                                                                                                                                                            |                                        |
|    |  |   |           | <i>POLG</i>     | c.158_159ins GCA   | p.Glyln55_Pro56ins Gln | ./.   | AD;AR/Het | 3 |                                                                                                                                                                                                                                                                                                                                                                            |                                        |
|    |  |   |           | <i>TRAP1</i>    | c.1432_1433 insCCG | Ser477_Gly478insAla    | T/B/N | AR/Het    | 3 |                                                                                                                                                                                                                                                                                                                                                                            |                                        |
|    |  |   |           | <i>RNF213</i>   | c.9952A>G          | p.Ile3318 Val          | T/P/D | AD/Het    | 3 |                                                                                                                                                                                                                                                                                                                                                                            |                                        |
|    |  |   |           | <i>LPIN2</i>    | c.1159A>G          | p.Lys387 Glu           | T/P/D | -/Het     | 3 |                                                                                                                                                                                                                                                                                                                                                                            |                                        |
|    |  |   |           | <i>ERCC2</i>    | c.1426G>A          | p.Val476Ile            | D/B/D | AR/Het    | 3 |                                                                                                                                                                                                                                                                                                                                                                            |                                        |
|    |  |   |           | <i>USP18</i>    | c.280G>A           | p.Glu94Lys             | D/D/N | AR/Het    | 3 |                                                                                                                                                                                                                                                                                                                                                                            |                                        |
| 64 |  | F | 18m onths | <i>MASP2</i>    | c.467G>A           | p.Cys156 Tyr           | D/D/D | AR/Het    | 3 | <b>Clinical features:</b> Sensorineural hearing loss, cardiomyopathy, hepatosplenomegaly, squint, hypotonia.<br><b>Investigations:</b> MRI brain showed posterior fossa haemorrhage and marked atrophy, distortion of cerebellum and abnormal brainstem. Periventricular calcification. Negative autoantibody profile and no systemic symptoms or other organ involvement. | Unclassified neuroinflammatory disease |
|    |  |   |           | <i>C8A</i>      | c.1331G>A          | p.Arg444 His           | D/D/D | AR/Het    | 3 |                                                                                                                                                                                                                                                                                                                                                                            |                                        |
|    |  |   |           | <i>DGUOK</i>    | c.4G>T             | p.Ala2Ser              | T/B/N | AR/Het    | 3 |                                                                                                                                                                                                                                                                                                                                                                            |                                        |
|    |  |   |           | <i>SLC25A12</i> | c.870G>C           | p.Glu290 Asp           | T/B/D | AR/Het    | 3 |                                                                                                                                                                                                                                                                                                                                                                            |                                        |
|    |  |   |           | <i>GATA2</i>    | c.481C>G           | p.Pro161 Ala           | T/D/D | AD/Het    | 3 |                                                                                                                                                                                                                                                                                                                                                                            |                                        |
|    |  |   |           | <i>CLCN2</i>    | c.704G>A           | p.Arg235 Gln           | D/D/D | AD;AR/Het | 3 |                                                                                                                                                                                                                                                                                                                                                                            |                                        |
|    |  |   |           | <i>C6</i>       | c.650T>C           | p.Ile217Thr            | T/B/N | AD/Het    | 3 |                                                                                                                                                                                                                                                                                                                                                                            |                                        |
|    |  |   |           | <i>CLEC16A</i>  | c.2707G>A          | p. Ala903Thr           | D/B/N | -/Het     | 3 |                                                                                                                                                                                                                                                                                                                                                                            |                                        |

|    |  |   |    |                      |           |                  |       |           |   |                                                                                                                                                                                                                                                                                             |                                               |
|----|--|---|----|----------------------|-----------|------------------|-------|-----------|---|---------------------------------------------------------------------------------------------------------------------------------------------------------------------------------------------------------------------------------------------------------------------------------------------|-----------------------------------------------|
|    |  |   |    | <i>GFAP</i>          | c.1288C>T | p.Arg430<br>Cys  | D/P/D | AD/Het    | 3 | <b>Treatment:</b><br>Corticosteroids                                                                                                                                                                                                                                                        |                                               |
|    |  |   |    | <i>PRX</i>           | c.1490C?T | p.Pro497<br>Leu  | D/B/D | AD;AR/Het | 3 |                                                                                                                                                                                                                                                                                             |                                               |
|    |  |   |    | <i>PRX</i>           | c.1483G>C | p.Glu495<br>Gln  | T/B/D | AD;AR/Het | 3 |                                                                                                                                                                                                                                                                                             |                                               |
|    |  |   |    | <i>CBS;CB<br/>SL</i> | c.833T>C  | p.Ile278T<br>hr  | D/D/A | AR/Het    | 4 |                                                                                                                                                                                                                                                                                             |                                               |
|    |  |   |    | <i>USP18</i>         | c.974A>G  | p.Asn325<br>Ser  | T/B/N | AR/Het    | 3 |                                                                                                                                                                                                                                                                                             |                                               |
| 65 |  | M | 15 | <i>PEX10</i>         | c.820A>G  | p.Thr274<br>Ala  | T/D/D | AR/Het    | 3 | <b>Clinical features:</b><br>Recurrent fevers,<br>developmental regression,<br>and family history of<br>lupus.<br><b>Investigations:</b> MRI<br>brain showed white<br>matter disease.<br>Negative autoantibodies<br>and no acute phase<br>response.<br><b>Treatment:</b><br>Corticosteroids | Unclassified<br>neuroinflamma<br>tory disease |
|    |  |   |    | <i>MASP2</i>         | c.1142C>T | p.Thr381I<br>le  | D/D/D | AR/Het    | 3 |                                                                                                                                                                                                                                                                                             |                                               |
|    |  |   |    | <i>C8A</i>           | c.1723C>T | p.Pro575<br>Ser  | T/B/N | AR/Het    | 3 |                                                                                                                                                                                                                                                                                             |                                               |
|    |  |   |    | <i>RANBP<br/>2</i>   | c.6362A>G | p.Gln212<br>1Arg | T/D/D | AD/Het    | 3 |                                                                                                                                                                                                                                                                                             |                                               |
|    |  |   |    | <i>IFIH1</i>         | c.2767A>G | p.Ile923V<br>al  | T/D/D | AD/Het    | 3 |                                                                                                                                                                                                                                                                                             |                                               |
|    |  |   |    | <i>GBE1</i>          | c.2017G>A | p.Ala673<br>Thr  | T/B/N | AR/Het    | 3 |                                                                                                                                                                                                                                                                                             |                                               |
|    |  |   |    | <i>WDR1</i>          | c.743A>G  | p.His248<br>Arg  | T/B/D | -/Het     | 3 |                                                                                                                                                                                                                                                                                             |                                               |
|    |  |   |    | <i>NOTCH<br/>1</i>   | c.3836G>A | p.Arg127<br>9His | T/B/D | AD/Het    | 3 |                                                                                                                                                                                                                                                                                             |                                               |
|    |  |   |    | <i>NOTCH<br/>1</i>   | c.2542G>A | p.Glu848<br>Lys  | T/D/D | AD/Het    | 3 |                                                                                                                                                                                                                                                                                             |                                               |
|    |  |   |    | <i>TSC2</i>          | c.1100G>A | p.Arg367<br>Gln  | T/D/D | AD/Het    | 3 |                                                                                                                                                                                                                                                                                             |                                               |
|    |  |   |    | <i>MEFV</i>          | c.554G>T  | p.Gly185<br>Val  | T/P/N | AD;AR/Het | 3 |                                                                                                                                                                                                                                                                                             |                                               |
|    |  |   |    | <i>MEFV</i>          | c.537C>G  | p.Ser179<br>Arg  | D/P/N | AD;AR/Het | 3 |                                                                                                                                                                                                                                                                                             |                                               |

|    |  |   |    |               |            |                      |       |            |   |                                                                                                                                                                                                                                  |                                          |
|----|--|---|----|---------------|------------|----------------------|-------|------------|---|----------------------------------------------------------------------------------------------------------------------------------------------------------------------------------------------------------------------------------|------------------------------------------|
|    |  |   |    | <i>TRAP1</i>  | c.1324G>A  | p.Glu442<br>Lys      | T/B/D | -/Het      | 3 |                                                                                                                                                                                                                                  |                                          |
|    |  |   |    | <i>CTCI</i>   | c.2162G>C  | p.Gly 721<br>Ala     | T/B/N | AR/Het     | 3 |                                                                                                                                                                                                                                  |                                          |
|    |  |   |    | <i>CTCI</i>   | c.1241G>C  | p.Gly414<br>Ala      | T/D/D | AR/Het     | 3 |                                                                                                                                                                                                                                  |                                          |
|    |  |   |    | <i>USP18</i>  | c.295G>A   | p.Val99I<br>e        | T/D/N | AR/Het     | 3 |                                                                                                                                                                                                                                  |                                          |
|    |  |   |    | <i>USP18</i>  | c.974A>G   | p.Asn325<br>Ser      | T/B/N | AR/Het     | 3 |                                                                                                                                                                                                                                  |                                          |
| 66 |  | M | 10 | <i>COL3A1</i> | c.4165G>T  | p.Ala138<br>9Ser     | T/B/N | AD/Het     | 3 | <b>Clinical features:</b><br>Common variable immunodeficiency, PANDAS like syndrome, colitis.<br><b>Investigations:</b> MRI brain non-specific white matter disease.<br>Negative autoantibody profile.<br><b>Treatment:</b> IVIG | Unclassified neuroinflammatory disease   |
|    |  |   |    | <i>DDX58</i>  | c.212G>A   | p.Arg71H<br>is       | D/D/N | AD/Het     | 3 |                                                                                                                                                                                                                                  |                                          |
|    |  |   |    | <i>CBL</i>    | c.2588A>G  | p.Asn863<br>Ser      | T/B/N | AD;Smu/Het | 3 |                                                                                                                                                                                                                                  |                                          |
|    |  |   |    | <i>NOD2</i>   | c.3017dupC | p.Leu100<br>7Profs*1 | ././  | AD;Mu/Hom  | 3 |                                                                                                                                                                                                                                  |                                          |
|    |  |   |    | <i>POLG2</i>  | c.1247G>C  | p.Gly416<br>Ala      | T/D/D | AD/Het     | 3 |                                                                                                                                                                                                                                  |                                          |
|    |  |   |    | <i>LPIN2</i>  | c.1654C>G  | p.Pro552<br>Ala      | D/D/D | -/Het      | 3 |                                                                                                                                                                                                                                  |                                          |
|    |  |   |    | <i>PRX</i>    | c.1483G>C  | p.Glu495<br>Gln      | T/B/N | AD;AR/Het  | 3 |                                                                                                                                                                                                                                  |                                          |
| 67 |  | M | 15 | <i>RANBP2</i> | c.6680A>G  | p.Tyr222<br>7Cys     | D/D/D | AD/Hom     | 3 | <b>Clinical features:</b><br>Common variable immunodeficiency, PANDAS like syndrome, colitis.<br>MRI brain non-specific white matter disease.<br>Negative autoantibody profile.<br><b>Treatment:</b> IVIG                        | Unclassified – neuroinflammatory disease |
|    |  |   |    | <i>FBN2</i>   | c.4312G>A  | p.Glu143<br>8Lys     | T/P/D | AD/Het     | 3 |                                                                                                                                                                                                                                  |                                          |
|    |  |   |    | <i>ITPR3</i>  | c.4366G>A  | p.Glu145<br>6Lys     | T/P/D | AR/Het     | 3 |                                                                                                                                                                                                                                  |                                          |
|    |  |   |    | <i>ITPR3</i>  | c.7301C>T  | p.Ser2434<br>Leu     | T/B/N | AR/Het     | 3 |                                                                                                                                                                                                                                  |                                          |
|    |  |   |    | <i>DDX58</i>  | c.212G>A   | p.Arg71H<br>is       | D/D/D | AD/Het     | 3 |                                                                                                                                                                                                                                  |                                          |

|    |  |   |    |                     |           |                  |       |           |   |                                                                                                                                                                                                                                                                                                                                  |                                               |
|----|--|---|----|---------------------|-----------|------------------|-------|-----------|---|----------------------------------------------------------------------------------------------------------------------------------------------------------------------------------------------------------------------------------------------------------------------------------------------------------------------------------|-----------------------------------------------|
|    |  |   |    | <i>C5</i>           | c.3047C>T | p.Ala101<br>6Val | T/D/D | AD/Het    | 3 |                                                                                                                                                                                                                                                                                                                                  |                                               |
|    |  |   |    | <i>CBL</i>          | c.2588A>G | p.Asn863<br>Ser  | T/B/N | AD/Het    | 3 |                                                                                                                                                                                                                                                                                                                                  |                                               |
|    |  |   |    | <i>NOD2</i>         | c.866A>G  | p.Asn289<br>Ser  | T/B/D | AD/Het    | 3 |                                                                                                                                                                                                                                                                                                                                  |                                               |
|    |  |   |    | <i>POLG2</i>        | c.1247G>C | p.Gly416<br>Ala  | T/D/D | AD/Het    | 3 |                                                                                                                                                                                                                                                                                                                                  |                                               |
|    |  |   |    | <i>LPIN2</i>        | c.1654C>G | p.Pro552<br>Ala  | D/D/D | -/Het     | 3 |                                                                                                                                                                                                                                                                                                                                  |                                               |
| 68 |  | F | 18 | <i>PEX10</i>        | c.820A>G  | p.Thr274<br>Ala  | T/D/D | AR/Het    | 3 | <p><b>Clinical features:</b><br/>Thyroiditis,<br/>leucoencephalopathy,<br/>peripheral neuropathy,<br/>thrombocytopenia.<br/><b>Investigations:</b> MRI<br/>brain non progressive<br/>white matter disease.<br/>Thyroid antibodies<br/>positive, other<br/>autoantibodies negative<br/><b>Treatment:</b><br/>corticosteroids.</p> | Unclassified<br>neuroinflamma<br>tory disease |
|    |  |   |    | <i>GJC2</i>         | c.355G>C  | p.Gly119<br>Arg  | T/P/N | AD;AR/Het | 3 |                                                                                                                                                                                                                                                                                                                                  |                                               |
|    |  |   |    | <i>GATA2</i>        | c.439C>T  | p.Pro147<br>Ser  | D/P/D | AD/Het    | 3 |                                                                                                                                                                                                                                                                                                                                  |                                               |
|    |  |   |    | <i>GUCY1<br/>A3</i> | c.720C>G  | p.Phe240<br>Leu  | T/B/N | AR/Het    | 3 |                                                                                                                                                                                                                                                                                                                                  |                                               |
|    |  |   |    | <i>OTULI<br/>N</i>  | c.439C>T  | p.Pro147<br>Ser  | T/B/N | AR/Het    | 3 |                                                                                                                                                                                                                                                                                                                                  |                                               |
|    |  |   |    | <i>HSD17<br/>B4</i> | c.1192T>C | p.Ser398P<br>ro  | T/B/N | AR/Het    | 3 |                                                                                                                                                                                                                                                                                                                                  |                                               |
|    |  |   |    | <i>LMNB1</i>        | c.872C>T  | p.Ala291<br>Val  | D/B/D | AD/Het    | 3 |                                                                                                                                                                                                                                                                                                                                  |                                               |
|    |  |   |    | <i>PEX6</i>         | c.235G>C  | p.Ala79Pr<br>o   | T/B/N | AD;AR/Het | 3 |                                                                                                                                                                                                                                                                                                                                  |                                               |
|    |  |   |    | <i>NOTCH<br/>1</i>  | c.4129C>T | p.Pro1377<br>Ser | T/B/N | AD/Het    | 3 |                                                                                                                                                                                                                                                                                                                                  |                                               |
|    |  |   |    | <i>ERCC6</i>        | c.3965G>T | p.Gly132<br>2Val | D/D/. | AD;AR/Het | 3 |                                                                                                                                                                                                                                                                                                                                  |                                               |
|    |  |   |    | <i>STAT2</i>        | c.2473G>T | p. Gly<br>825C   | T/B/N | AR/Het    | 3 |                                                                                                                                                                                                                                                                                                                                  |                                               |
|    |  |   |    | <i>TSC2</i>         | c.3100G>A | p.Val103<br>4Ile | D/D/D | AD/Het    | 3 |                                                                                                                                                                                                                                                                                                                                  |                                               |

|    |  |   |   |               |           |                  |       |           |   |                                                                                                                                                                                                                                         |                                        |
|----|--|---|---|---------------|-----------|------------------|-------|-----------|---|-----------------------------------------------------------------------------------------------------------------------------------------------------------------------------------------------------------------------------------------|----------------------------------------|
|    |  |   |   | <i>MEFV</i>   | c.688G>A  | p.E230K          | D/B/N | AD;AR/Het | 3 |                                                                                                                                                                                                                                         |                                        |
|    |  |   |   | <i>PLCG2</i>  | c.1258G>A | p.Ala420<br>Thr  | T/B/N | AD/Het    | 3 |                                                                                                                                                                                                                                         |                                        |
|    |  |   |   | <i>NOTCH3</i> | c.4036C>T | p.His1346<br>Tyr | T/D/. | AD/Het    | 3 |                                                                                                                                                                                                                                         |                                        |
| 69 |  | M | 8 | <i>MFN2</i>   | c.1574A>G | p.Asn525<br>Ser  | T/B/N | AD;AR/Het | 3 | <b>Clinical features:</b> Autism and epilepsy. No systemic symptoms or other organ involvement<br><b>Investigations:</b> MRI brain showed non progressive white matter disease. Negative autoantibody profile.<br><b>Treatment:</b> Nil | Unclassified neuroinflammatory disease |
|    |  |   |   | <i>CIQC</i>   | c.8T>C    | p.Val3Ala        | T/B/N | AR/Het    | 3 |                                                                                                                                                                                                                                         |                                        |
|    |  |   |   | <i>C8A</i>    | c.1558C>T | p.Arg520<br>Cys  | D/D/N | AR/Het    | 3 |                                                                                                                                                                                                                                         |                                        |
|    |  |   |   | <i>RANBP2</i> | c.1258A>G | p.Thr420<br>Ala  | T/B/N | AD/Het    | 3 |                                                                                                                                                                                                                                         |                                        |
|    |  |   |   | <i>RANBP2</i> | c.2306G>A | p.Arg769<br>Gln  | T/B/N | AD/Het    | 3 |                                                                                                                                                                                                                                         |                                        |
|    |  |   |   | <i>FBN2</i>   | c.3476T>C | p.Ile1159<br>Thr | D/P/D | AD/Het    | 3 |                                                                                                                                                                                                                                         |                                        |
|    |  |   |   | <i>RHOD</i>   | c.244C>T  | p.Arg82T<br>rp   | D/D/D | -/Het     | 3 |                                                                                                                                                                                                                                         |                                        |
|    |  |   |   | <i>ATP7B</i>  | c.406A>G  | p.Arg136<br>Gly  | T/B/N | AR/Het    | 3 |                                                                                                                                                                                                                                         |                                        |
|    |  |   |   | <i>TSC2</i>   | c.5017G>C | p.Val167<br>3Leu | D/B/N | AD/Het    | 3 |                                                                                                                                                                                                                                         |                                        |
|    |  |   |   | <i>NOD2</i>   | c.1621C>T | p.Arg541<br>Trp  | D/D/N | AD;Mu/Het | 3 |                                                                                                                                                                                                                                         |                                        |
|    |  |   |   | <i>DNASE2</i> | c.664G>A  | p.Gly222<br>Arg  | D/D/D | -/Het     | 3 |                                                                                                                                                                                                                                         |                                        |
|    |  |   |   | <i>NOTCH3</i> | c.5779G>A | p.Ala192<br>7Thr | T/B/D | AD/Het    | 3 |                                                                                                                                                                                                                                         |                                        |
|    |  |   |   | <i>TYMP</i>   | c.194G>A  | p.Ser65A<br>sn   | T/B/N | AR/Het    | 3 |                                                                                                                                                                                                                                         |                                        |
|    |  |   |   | <i>MEFV</i>   | c.442G>C  | p.Glu148<br>Gln  | D/D/P | AD;AR/Het | 3 |                                                                                                                                                                                                                                         |                                        |
| 70 |  | F | 6 | <i>RANBP2</i> | c.5941T>A | p.Ser1981<br>Thr | T/B/N | AD/Het    | 3 | <b>Clinical features:</b><br>Arthralgia and                                                                                                                                                                                             |                                        |

|    |  |   |    |                 |                   |                       |       |           |   |                                                                                                                                                                                                                                                                                                                                      |                                        |
|----|--|---|----|-----------------|-------------------|-----------------------|-------|-----------|---|--------------------------------------------------------------------------------------------------------------------------------------------------------------------------------------------------------------------------------------------------------------------------------------------------------------------------------------|----------------------------------------|
|    |  |   |    | <i>DNASE1L3</i> | c.244G>C          | p. Gly82Arg           | T/B/N | AR/Het    | 3 | erythematous skin rash, headaches and cognitive decline.<br><b>Investigations:</b> MRI brain showed white matter disease with T2 progressive enhancing lesions.<br>No acute phase response, MPO antibodies positive on one occasion, negative autoantibody screen since. Sibling of patient 66.<br><b>Treatment:</b> corticosteroids | Unclassified neuroinflammatory disease |
|    |  |   |    | <i>SAMD3</i>    | c.1112C>T         | p.Thr371Ile           | T/P/D | -/Het     | 3 |                                                                                                                                                                                                                                                                                                                                      |                                        |
|    |  |   |    | <i>ELN</i>      | c.1043G>A         | p.Gly348Glu           | D/D/D | AD/Het    | 3 |                                                                                                                                                                                                                                                                                                                                      |                                        |
|    |  |   |    | <i>STAT2</i>    | c.2473G>T         | p.Gly825Cys           | T/B/N | AR/Het    | 3 |                                                                                                                                                                                                                                                                                                                                      |                                        |
|    |  |   |    | <i>POLG</i>     | c.158_159insGCA   | p.Gln55_Pro56insGln   | ./.   | AD/Het    | 3 |                                                                                                                                                                                                                                                                                                                                      |                                        |
|    |  |   |    | <i>HSD17B4</i>  | c.1438-2A>G       | p.Intronic            | ./D   | AR/Het    | 3 |                                                                                                                                                                                                                                                                                                                                      |                                        |
| 71 |  | M | 18 | <i>RANBP2</i>   | c.3162G>T         | p. Gln1054His         | T/B/D | AD/Het    | 3 | <b>Clinical features:</b> Peripheral neuropathy and erythematous skin rashes.<br><b>Investigations:</b> MRI brain showed non progressive white matter disease.<br>GAD antibodies positive, remaining autoantibody screen negative.<br><b>Treatment:</b> corticosteroids                                                              | Unclassified neuroinflammatory disease |
|    |  |   |    | <i>RANBP2</i>   | c.3163C>T         | p.Pro1055Ser          | T/B/D | AD/Het    | 3 |                                                                                                                                                                                                                                                                                                                                      |                                        |
|    |  |   |    | <i>CLCN2</i>    | c.2103G>C         | p.Glu701Asp           | T/B/N | AD;AR/Het | 3 |                                                                                                                                                                                                                                                                                                                                      |                                        |
|    |  |   |    | <i>CLCN2</i>    | c.2012G>A         | p.Arg671Gln           | T/B/D | AD;AR/Het | 3 |                                                                                                                                                                                                                                                                                                                                      |                                        |
|    |  |   |    | <i>CLCN2</i>    | c.1883_1884insCCG | p.Arg629_Gln630insArg | ./.   | AD;AR/Hom | 3 |                                                                                                                                                                                                                                                                                                                                      |                                        |
|    |  |   |    | <i>ERCC8</i>    | c.1012G>A         | p. Asp338Asn          | T/B/D | AR/Het    | 3 |                                                                                                                                                                                                                                                                                                                                      |                                        |
|    |  |   |    | <i>TGFBI</i>    | c.1061A>G         | p.Asn354Ser           | D/P/D | AD/Het    | 3 |                                                                                                                                                                                                                                                                                                                                      |                                        |
|    |  |   |    | <i>SAMD3</i>    | c.1112C>T         | p.T371Ile             | T/P/D | -/Het     | 3 |                                                                                                                                                                                                                                                                                                                                      |                                        |
|    |  |   |    | <i>ELN</i>      | c.1043G>A         | p. Gly348Glu          | D/D/D | AD/Het    | 3 |                                                                                                                                                                                                                                                                                                                                      |                                        |

|    |  |   |               |                |                  |                      |        |           |   |                                                                                                                                                                                                                                                                                                                                                                                                                                                                                       |                                        |
|----|--|---|---------------|----------------|------------------|----------------------|--------|-----------|---|---------------------------------------------------------------------------------------------------------------------------------------------------------------------------------------------------------------------------------------------------------------------------------------------------------------------------------------------------------------------------------------------------------------------------------------------------------------------------------------|----------------------------------------|
|    |  |   |               | <i>PEX2</i>    | c.748T>C         | p.Trp250 Arg         | T/D/D  | AR/Het    | 3 |                                                                                                                                                                                                                                                                                                                                                                                                                                                                                       |                                        |
|    |  |   |               | <i>TBK1</i>    | c.1391T>C        | p.Val464 Ala         | T/B/D  | AD/Het    | 3 |                                                                                                                                                                                                                                                                                                                                                                                                                                                                                       |                                        |
|    |  |   |               | <i>POLG</i>    | c.158_159ins GCA | p.Gln55_Pro56ins Gln | ./.    | AD;AR/Het | 3 |                                                                                                                                                                                                                                                                                                                                                                                                                                                                                       |                                        |
|    |  |   |               | <i>POLG</i>    | c.G125A          | p.Arg42Gln           | ./.    | AD;AR/Het | 3 |                                                                                                                                                                                                                                                                                                                                                                                                                                                                                       |                                        |
|    |  |   |               | <i>NOTCH3</i>  | c.3399C>A        | p.His1133 Gln        | T/B/N  | AD/Het    | 3 |                                                                                                                                                                                                                                                                                                                                                                                                                                                                                       |                                        |
|    |  |   |               | <i>PRX</i>     | c.4077_4079 del  | p.Glu1361 del        | ./.    | AD;AR/Het | 3 |                                                                                                                                                                                                                                                                                                                                                                                                                                                                                       |                                        |
|    |  |   |               | <i>HSD17B4</i> | c.1438-2A>G      | p.Intron1c           | ./D    | AR/Het    | 3 |                                                                                                                                                                                                                                                                                                                                                                                                                                                                                       |                                        |
| 72 |  | M | 3             | <i>CIQC</i>    | c.559G>A         | p.Val187Ile          | T/B/N  | AR/Het    | 3 | <p><b>Clinical features:</b> Episode of HSV encephalitis in infancy treated with antivirals; recurrence of seizures age 4 years old. No other systemic symptoms or other organ involvement</p> <p><b>Investigations:</b> MRI brain showed widespread asymmetrical cortical and subcortical thalamic enhancing lesions on MRI brain. Brain biopsy revealed granulomatous inflammation. Negative autoantibodies, no acute phase response.</p> <p><b>Treatment:</b> corticosteroids.</p> | Chronic HSV granulomatous encephalitis |
|    |  |   | <i>RANBP2</i> | c.7172C>G      | p.Thr2391Ser     | T/B/N                | AD/Het | 3         |   |                                                                                                                                                                                                                                                                                                                                                                                                                                                                                       |                                        |
|    |  |   | <i>TGFBR2</i> | c.449del       | p.Lys153Serfs*34 | ./.                  | AD/Het | 3         |   |                                                                                                                                                                                                                                                                                                                                                                                                                                                                                       |                                        |
|    |  |   | <i>PEX1</i>   | c.3283G>A      | p.Asp1095Asn     | T/D/D                | AR/Het | 3         |   |                                                                                                                                                                                                                                                                                                                                                                                                                                                                                       |                                        |
|    |  |   | <i>POLG2</i>  | c.1105A>G      | p.Arg369Gly      | D/D/D                | AD/Het | 3         |   |                                                                                                                                                                                                                                                                                                                                                                                                                                                                                       |                                        |
|    |  |   | <i>ERCC2</i>  | c.442C>T       | p.His148Tyr      | T/B/D                | AR/Het | 3         |   |                                                                                                                                                                                                                                                                                                                                                                                                                                                                                       |                                        |
|    |  |   | <i>NLRP12</i> | c.3088C>G      | p.Arg1030Gly     | D/D/N                | AD/Het | 3         |   |                                                                                                                                                                                                                                                                                                                                                                                                                                                                                       |                                        |



|    |  |   |    |               |                |              |       |           |   |                                                                                                                                                                                                                                                                                                                                                                                                                                          |                                        |
|----|--|---|----|---------------|----------------|--------------|-------|-----------|---|------------------------------------------------------------------------------------------------------------------------------------------------------------------------------------------------------------------------------------------------------------------------------------------------------------------------------------------------------------------------------------------------------------------------------------------|----------------------------------------|
| 73 |  | F | 15 | <i>SDHB</i>   | c.487T>C       | p.Ser163Pro  | T/B/A | AD/Het    | 3 | <p><b>Clinical features:</b> Papilloedema and headaches, raised ICP, arthralgia but no other systemic symptoms</p> <p><b>Investigations:</b> MRI brain showed white matter insular and frontal cortex lesions. No acute phase response, autoantibodies negative.</p> <p><b>Treatment:</b> corticosteroids.</p>                                                                                                                           | Unclassified neuroinflammatory disease |
|    |  |   |    | <i>TRNT1</i>  | c.1232T>C      | p.Ile411Thr  | D/P/D | AR/Het    | 3 |                                                                                                                                                                                                                                                                                                                                                                                                                                          |                                        |
|    |  |   |    | <i>C5</i>     | c.3029C>T      | c.Thr1232Cys | T/D/D | AD/Het    | 3 |                                                                                                                                                                                                                                                                                                                                                                                                                                          |                                        |
|    |  |   |    | <i>NOTCH1</i> | c.3836G>A      | p.Arg1279His | T/B/D | -/Het     | 3 |                                                                                                                                                                                                                                                                                                                                                                                                                                          |                                        |
|    |  |   |    | <i>DNASE1</i> | c.619C>T       | p.Arg207Cys  | D/D/D | AD/Het    | 3 |                                                                                                                                                                                                                                                                                                                                                                                                                                          |                                        |
|    |  |   |    | <i>ACOX1</i>  | c.1830A>T      | p.Glu610Asp  | T/B/D | AR/Het    | 3 |                                                                                                                                                                                                                                                                                                                                                                                                                                          |                                        |
|    |  |   |    | <i>RNF213</i> | c.14030G>T     | p.Trp4677Leu | D/D/D | -/Het     | 3 |                                                                                                                                                                                                                                                                                                                                                                                                                                          |                                        |
|    |  |   |    | <i>PRX</i>    | c.4077_4079del | p.Glu1361del | ././  | AD;AR/Het | 3 |                                                                                                                                                                                                                                                                                                                                                                                                                                          |                                        |
| 74 |  | F | 4  | <i>MASP2</i>  | c.881C>T       | p.Thr294Met  | D/B/N | AR/Het    | 3 | <p><b>Clinical features:</b> Raised ICP, right sided sixth nerve palsy and ophthalmological examination revealed papilloedema.</p> <p><b>Investigations:</b> MRI brain showed bilateral subdural haemorrhages and left sided cortical swelling with involvement of the caudate nucleus and hippocampus and bilateral shallow subdural collections, left being more acute than the right of uncertain aetiology, possibly an acute on</p> | Unclassified neuroinflammatory disease |
|    |  |   |    | <i>TGFBR2</i> | c.1234G>A      | p.Val412Met  | T/D/D | AD/Het    | 3 |                                                                                                                                                                                                                                                                                                                                                                                                                                          |                                        |
|    |  |   |    | <i>HFE</i>    | c.829G>A       | p.Glu2771ys  | D/D/D | AR/Het    | 3 |                                                                                                                                                                                                                                                                                                                                                                                                                                          |                                        |
|    |  |   |    | <i>PEX1</i>   | c.1380A>C      | p.Glu460Asp  | T/B/D | -/Het     | 3 |                                                                                                                                                                                                                                                                                                                                                                                                                                          |                                        |
|    |  |   |    | <i>COL4A1</i> | c.1673C>T      | p.Ala558Val  | T/B/D | AD/Het    | 3 |                                                                                                                                                                                                                                                                                                                                                                                                                                          |                                        |
|    |  |   |    | <i>IRF8</i>   | c.982T>G       | p.Phe328Val  | D/B/N | AD;AR/Het | 3 |                                                                                                                                                                                                                                                                                                                                                                                                                                          |                                        |
|    |  |   |    | <i>CTCI</i>   | c.671G>A       | p.Arg224Gln  | T/B/N | AR/Het    | 3 |                                                                                                                                                                                                                                                                                                                                                                                                                                          |                                        |

|    |  |   |    |              |          |              |       |        |   |                                                                                                                                                                                                                                                                                                                                                                                                                                                                                                                                                                                                               |                                        |
|----|--|---|----|--------------|----------|--------------|-------|--------|---|---------------------------------------------------------------------------------------------------------------------------------------------------------------------------------------------------------------------------------------------------------------------------------------------------------------------------------------------------------------------------------------------------------------------------------------------------------------------------------------------------------------------------------------------------------------------------------------------------------------|----------------------------------------|
|    |  |   |    |              |          |              |       |        |   | <p>chronic process. Repeat scans showed increased ventricular dilatation and persistent filling defect in the right sigmoid sinus thought to represent a non-occlusive thrombus. CT Angiogram - No radiological features to suggest a mid or large vessel vasculitis. No acute phase response, autoantibodies negative, CSF raised neopterin (105nmol/l, RR&lt;65 nmol/l), raised blood lactate at first presentation (7.9 and 4.3), CSF lactate normal, no infection identified.</p> <p><b>Treatment:</b><br/>dexamethasone and underwent a burr-hole procedure and evacuation of sub-dural haemorrhage.</p> |                                        |
| 75 |  | M | 16 | <i>MASP2</i> | c.881C>T | p.Thr294 Met | D/B/N | AR/Het | 3 | <p><b>Clinical features:</b><br/>Developmental delay, dystonia. No systemic symptoms or other organ involvement</p>                                                                                                                                                                                                                                                                                                                                                                                                                                                                                           | Unclassified neuroinflammatory disease |
|    |  |   |    | <i>PLOD1</i> | c.376T>G | p.Phe126 Val | D/D/D | AR/Hom | 3 |                                                                                                                                                                                                                                                                                                                                                                                                                                                                                                                                                                                                               |                                        |
|    |  |   |    | <i>C8A</i>   | c.176G>A | p.Arg59Gln   | D/D/D | AR/Het | 3 |                                                                                                                                                                                                                                                                                                                                                                                                                                                                                                                                                                                                               |                                        |

|    |  |   |   |               |            |               |       |           |   |                                                                                                                                                   |                                        |
|----|--|---|---|---------------|------------|---------------|-------|-----------|---|---------------------------------------------------------------------------------------------------------------------------------------------------|----------------------------------------|
|    |  |   |   | <i>C8A</i>    | c.1742C>G  | p.Thr581 Arg  | T/P/D | AR/Het    | 3 | <b>Investigations:</b> Bilateral striatal necrosis on MRI brain imaging. Negative autoantibody screen. Negative CSF OGB.<br><b>Treatment:</b> Nil |                                        |
|    |  |   |   | <i>PTPN22</i> | c.550A>G   | p.Thr184 Ala  | T/B/D | AD;AR/Het | 3 |                                                                                                                                                   |                                        |
|    |  |   |   | <i>RANBP2</i> | c.1730A>G  | p.Ala550 Gly  | D/B/N | AD/Het    | 3 |                                                                                                                                                   |                                        |
|    |  |   |   | <i>IFIH1</i>  | c.2431A>G  | p.Thr811 Ala  | D/D/D | AD/Het    | 3 |                                                                                                                                                   |                                        |
|    |  |   |   | <i>SCN9A</i>  | c.1838C>T  | p.Pro613 Leu  | D/B/D | AD;AR/Het | 3 |                                                                                                                                                   |                                        |
|    |  |   |   | <i>SAMD3</i>  | c.569T>C   | p.Leu190 Pro  | D/D/D | -/Het     | 3 |                                                                                                                                                   |                                        |
|    |  |   |   | <i>SAMD3</i>  | c.241C>G   | p.Leu81 Val   | T/B/N | -/Het     | 3 |                                                                                                                                                   |                                        |
|    |  |   |   | <i>ELN</i>    | c.328G>A   | p.Ala110 Thr  | D/D/D | AD/Het    | 3 |                                                                                                                                                   |                                        |
|    |  |   |   | <i>NDUFA1</i> | c.536G>A   | p.Arg179 Gln  | T/B/N | AR/Het    | 3 |                                                                                                                                                   |                                        |
|    |  |   |   | <i>CTCI</i>   | c.139A>G   | p.Lys47G lu   | T/D/N | AR/Het    | 3 |                                                                                                                                                   |                                        |
|    |  |   |   | <i>ATPAF2</i> | c.310T>C   | p.Tyr104 His  | T/B/D | AR/Het    | 3 |                                                                                                                                                   |                                        |
|    |  |   |   | <i>RNF213</i> | c.15017C>T | p.Ser5006 Leu | T/B/B | -/Het     | 3 |                                                                                                                                                   |                                        |
|    |  |   |   | <i>LPIN2</i>  | c.2621G>T  | p.Cys874 Phe  | T/B/D | -/Het     | 3 |                                                                                                                                                   |                                        |
|    |  |   |   | <i>MEFV</i>   | c.442G>C   | p.Glu148 Gln  | D/D/P | AD;AR/Het | 3 |                                                                                                                                                   |                                        |
|    |  |   |   | <i>CFHR5</i>  | c.970+2T>G | -             | ././D | AD/Het    | 3 |                                                                                                                                                   |                                        |
| 76 |  | M | 7 | <i>CFHR5</i>  | c.1067G>A  | p.Arg356 His  | T/P/N | AD/Het    | 3 | <b>Clinical features:</b> Recurrent fevers, headaches, arthralgia, loss of memory, seizures.                                                      | Unclassified neuroinflammatory disease |
|    |  |   |   | <i>RANBP2</i> | c.7172C>G  | p.Thr239 1Ser | T/B/N | AD/Het    | 3 |                                                                                                                                                   |                                        |

|  |  |  |  |                    |                     |                             |       |           |   |                                                                                                                                                                                        |  |
|--|--|--|--|--------------------|---------------------|-----------------------------|-------|-----------|---|----------------------------------------------------------------------------------------------------------------------------------------------------------------------------------------|--|
|  |  |  |  | <i>BTD</i>         | c.133G>A            | p. Gly<br>45Arg             | T/B/N | AR/Het    | 3 | <b>Investigations:</b> MRI<br>brain non progressive<br>white matter disease,<br>normal ESR and CRP,<br>normal SAA, negative<br>autoantibodies.<br><b>Treatment:</b><br>corticosteroids |  |
|  |  |  |  | <i>TGFBR<br/>2</i> | c.449del            | p.Lys153<br>Serfs*34        | ././. | AD/Het    | 3 |                                                                                                                                                                                        |  |
|  |  |  |  | <i>PEX6</i>        | c.235G>C            | p.Ala79Pro                  | T/B/N | AD;AR/Het | 3 |                                                                                                                                                                                        |  |
|  |  |  |  | <i>POLG</i>        | c.158_159ins<br>GCA | p.Gln55_<br>Pro56ins<br>Gln | ././. | AD;AR/Het | 3 |                                                                                                                                                                                        |  |
|  |  |  |  | <i>PEX26</i>       | c.457C>G            | p.Leu153<br>Val             | T/B/N | AD;AR/Het | 3 |                                                                                                                                                                                        |  |

**eFigure. Further Tests in Patients With Isolated Neuroinflammation**

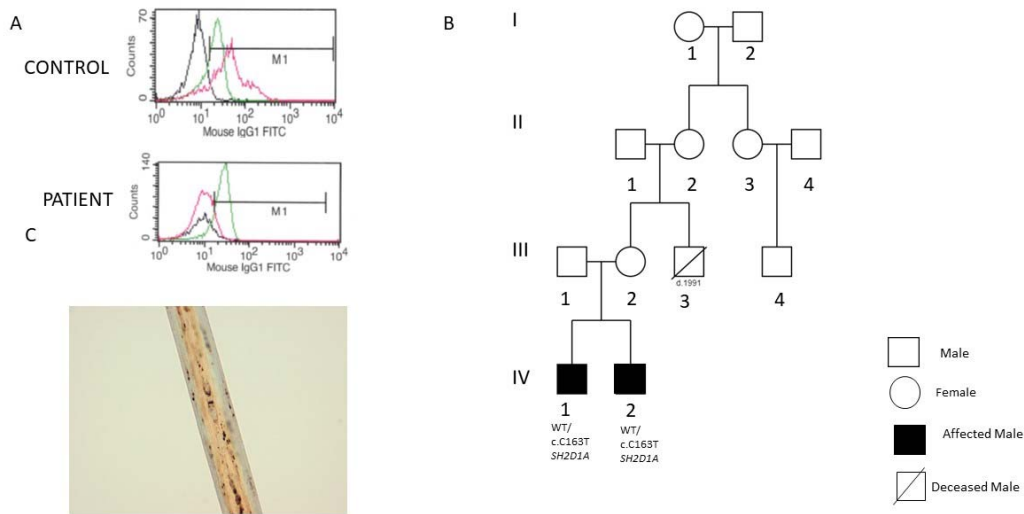

**eFigure.** (A) Absent signaling-lymphocytic-activation-molecule-associated protein (SAP) protein expression in lymphocytes derived from a 3 year old patient with isolated neuroinflammation due to X linked lymphoproliferative disease. (B) Pedigree for family of same patient (IV-1) diagnosed with X linked lymphoproliferative disease due to heterozygous NM\_002351:c.C163T (p.Arg55Ter) in the SH2 Domain Containing 1A (*SH2D1A*) gene. His sibling (IV-2) also carried the same mutation. (C) Hair shaft examination from patient 42, showing prominent, diffuse clumps of melanin pigment, typical of Griscelli syndrome. She was identified on NIP to have two variants NM\_004580:c.C550T (p.Arg184Ter) and NM\_004580:c.G259C (p.Ala87Pro) variants in the Member RAS Oncogene Family (*RAB27A*) gene.
